# Supplementary material for: A 2700-year annual timescale and accumulation history for an ice core from Roosevelt Island, West Antarctica
Source: Copernicus journal article supplement (doi:10.5194/cp-15-751-2019), 2019-04-10
Supplement: Supplementary file 1 [file RICE_2700-year_timescale_and_accumulation.xlsx]

## Sheet: Metadata
Study
Study Title (where, when, what)	Roosevelt Island Climate Evolution (RICE) ice core from Roosevelt Island, Ross Sea Region, Antarctica
Original Source_URL (if applicable)
Investigators	Winstrup, Mai
Proxy Archive	Ice cores
Description and Notes	Annually resolved timescale and snow accumulation record for the past 2,700 years derived from the RICE ice core
Scientific keywords	RICE, timescale, agescale, snow accumulation, climate, Antarctica, Roosevelt Island
Publication Section
Authors	Winstrup, M., Vallelonga, P., Kjær, H. A., Fudge, T. J., Lee, J. E., Riis, M. H., Edwards, R., Bertler, N. A. N., Blunier, T., Brook, E. J., Buizert, C., Ciobanu, G., Conway, H., Dahl-Jensen, D., Ellis, A., Emanuelsson, B. D., Hindmarsh, R. C. A., Keller, E. D., Kurbatov, A. V., Mayewski, P. A., Neff, P. D., Pyne, R. L., Simonsen, M. F., Svensson, A., Tuohy, A., Waddington, E. D., and Wheatley, S.	Bertler, N. A. N., Conway, H., Dahl-Jensen, D., Emanuelsson, D. B., Winstrup, M., Vallelonga, P. T., Lee, J. E., Brook, E. J., Severinghaus, J. P., Fudge, T. J., Keller, E. D., Baisden, W. T., Hindmarsh, R. C. A., Neff, P. D., Blunier, T., Edwards, R., Mayewski, P. A., Kipfstuhl, S., Buizert, C., Canessa, S., Dadic, R., Kjær, H. A., Kurbatov, A., Zhang, D., Waddington, E. D., Baccolo, G., Beers, …	Thomas, E. R., van Wessem, J. M., Roberts, J., Isaksson, E., Schlosser, E., Fudge, T. J., Vallelonga, P., Medley, B., Lenaerts, J., Bertler, N., van den Broeke, M. R., Dixon, D. A., Frezzotti, M., Stenni, B., Curran, M., and Ekaykin, A. A.	Lee, J., Brook, E. J., Bertler, N. A. N., Buizert, C., Baisden, W. T., Blunier, T., Ciobanu, G., Conway, H., Dahl-Jensen, D., Fudge, T. J., Hindmarsh, R. C. A., Keller, E. D., Parrenin, F., Severinghaus, J. P., Vallelonga, P., Waddington, E. D. and Winstrup, M.
Publication title	A 2700-year annual timescale and accumulation history for an ice core from Roosevelt Island, West Antarctica	The Ross Sea Dipole – temperature, snow accumulation and sea ice variability in the Ross Sea region, Antarctica, over the past 2,700 years	Regional Antarctic snow accumulation over the past 1000 years	A 83,000 year old ice core from Roosevelt Island, Ross Sea, Antarctica
Journal	Climate of the Past	Climate of the Past	Climate of the Past	Climate of the Past Discussions
Year	2019	2018	2017	2018
Volume		14	13
Issue
Pages		193-214	1491-1513	1-44
Report Number
DOI		10.5194/cp-14-193-2018	10.5194/cp-13-1491-2017	doi:10.5194/cp-2018-68
Abstract	We present a 2700-year annually-resolved chronology and snow accumulation history for the Roosevelt Island Climate Evolution (RICE) ice core, Ross Ice Shelf, West Antarctica. The timescale was constructed by identifying annual cycles in high-resolution impurity records, and it constitutes the top part of the Roosevelt Island Ice Core Chronology 2017 (RICE17). The timescale was validated by volcan…	High-resolution, well-dated climate archives provide an opportunity to investigate the dynamic interactions of climate patterns relevant for future projections. Here, we present data from a new, annually dated ice core record from the eastern Ross Sea, named the Roosevelt Island Climate Evolution (RICE) ice core. Comparison of this record with climate reanalysis data for the 1979–2012 interval sh…	Here we present Antarctic snow accumulation variability at the regional scale over the past 1000 years. A total of 79 ice core snow accumulation records were gathered and assigned to seven geographical regions, separating the high-accumulation coastal zones below 2000m of elevation from the dry central Antarctic Plateau. The regional composites of annual snow accumulation were evaluated against m…	In 2013, an ice core was recovered from Roosevelt Island in the Ross Sea, Antarctica, as part of the Roosevelt Island Climate Evolution (RICE) project. Roosevelt Island is located between two submarine troughs carved by paleo-ice-streams. The RICE ice core provides new important information about the past configuration of the West Antarctic Ice Sheet and its retreat during the most recent deglaci…
Alternate citation in paragraph format (fields above preferred)
Site Information
Site name	Roosevelt Island
Northernmost latitude (decimal degree, South negative)	-79.36398
Southernmost latitude (decimal degree, South negative)	-79.36398
Easternmost longitude (decimal degree, West negative)	-161.70645
Westernmost longitude (decimal degree, West negative)	-161.70645
Elevation (m), negative below sea level	550
Data Collection Information
Collection_Name (typically a core name)	RICE
Oldest Year (relative to 1950AD)	2649
Most Recent Year relative to 1950AD)	-62
Time_Unit	CE, BP 1950
Notes
Core_Length	764m; only the top 343.72m are presented here
Units for Core Length	m
Funding_Agency
Funding_Agency_Name	University of Copenhagen, Carlsberg Foundation, European Research Council
Grant	"North-South Climate Connection" Project; ERC FP7/2007-2013 grant agreement 610055 ("Ice2Ice")

## Sheet: Chronology and accumulation
RICE annual-layer-counted timescale and accumulation record (RICE17; 2012 CE-700 BCE)
Dating method:	Annual layer counting using continuous flow measurements of black carbon, Ca, pH, conductivity, stable isotopes, discrete samples of SO4, among others. The estimated 95% age confidence interval is provided. The timescale was constructed by a combination of manual and automated annual-layer counting, and subsequently validated by volcanic and methane matching to the WAIS Divide ice core on the WD2…
Accumulation rates:	Past annual accumulation rates were obtained from the annual layer thicknesses, after correction for firn densification and layer thinning due to ice flow. The uncertainty of past accumulation rates was estimated based on the uncertainty in ice flow thinning with depth.
Depth:	0 - 344 m
Age:	2012 CE to 700 BCE
For questions on the use or construction of this chronology and corresponding accumulation rate history, please contact:
			Mai Winstrup, Centre for Ice and Climate, University of Copenhagen				mai@nbi.ku.dk
For questions regarding the RICE chemistry data:			Paul Vallelonga, Centre for Ice and Climate, University of Copenhagen				vallelonga@nbi.ku.dk
For questions regarding the thinning rate reconstruction:			T.J. Fudge, Earth and Space Sciences, University of Washington				tjfudge@uw.edu
References:
Winstrup et al, A 2700-year annual timescale and accumulation history for an ice core from Roosevelt Island, West Antarctica, Climate of the Past (2019)
Data has been archived at PANGAEA with the following reference:
Winstrup et al (2019): Roosevelt Island Climate Evolution (RICE) ice core: The RICE17 chronology and accumulation record for the past 2700 years. PANGAEA, https://doi.org/10.1594/PANGAEA.899147
Depth [m]	Age [CE]	Age [BP 1950]	Max age (oldest) [BP 1950]	Min age (youngest) [BP 1950]	Layer thickness [m]	Density [g/cm3]	Thinning	Min thinning	Max thinning	Accumulation [m.w.eq]	Min accumulation [m.w.eq]	Max accumulation [m.w.eq]
0.53	2012	-62	-62	-62	0.53	0.414686	0.9996	0.9996	0.9996	0.219872	0.219872	0.219872
1.29	2011	-61	-61	-61	0.76	0.426093	0.998142	0.996362	0.998464	0.324433	0.324328	0.325013
1.46	2010	-60	-60	-60	0.17	0.43435	0.997842	0.995775	0.998346	0.0739992	0.0739619	0.0741529
1.81	2009	-59	-59	-60	0.35	0.438972	0.997254	0.994622	0.998183	0.154063	0.15392	0.154471
2.23	2008	-58	-58	-59	0.42	0.445817	0.996721	0.993578	0.997799	0.187859	0.187656	0.188453
2.7	2007	-57	-57	-58	0.47	0.453745	0.995987	0.992229	0.997279	0.214119	0.213842	0.21493
3.13	2006	-56	-56	-57	0.43	0.461762	0.995379	0.991109	0.996732	0.19948	0.199209	0.200339
3.57	2005	-55	-55	-56	0.44	0.469507	0.994673	0.98984	0.996164	0.207689	0.207379	0.208704
3.91	2004	-54	-54	-55	0.34	0.47645	0.99415	0.988915	0.995729	0.162946	0.162688	0.163809
4.33	2003	-53	-53	-54	0.42	0.483206	0.993575	0.987871	0.995192	0.204259	0.203927	0.205438
4.9	2002	-52	-51	-53	0.57	0.491984	0.992572	0.986099	0.994524	0.28253	0.281975	0.284384
5.31	2001	-51	-50	-52	0.41	0.500661	0.991779	0.984728	0.993875	0.206973	0.206536	0.208455
5.8	2000	-50	-49	-51	0.49	0.508587	0.991027	0.983427	0.993062	0.251464	0.250949	0.253407
6.13	1999	-49	-48	-50	0.33	0.515808	0.990649	0.982668	0.992561	0.171823	0.171492	0.173219
6.48	1998	-48	-47	-49	0.35	0.521744	0.990269	0.981434	0.991976	0.184405	0.184087	0.186065
6.78	1997	-47	-46	-48	0.3	0.527412	0.989848	0.980601	0.991615	0.159846	0.159562	0.161354
7.03	1996	-46	-45	-47	0.25	0.532209	0.989445	0.979882	0.991297	0.134472	0.13422	0.135784
7.33	1995	-45	-44	-46	0.3	0.53687	0.988941	0.979028	0.990907	0.162862	0.162539	0.164511
7.73	1994	-44	-43	-45	0.4	0.542711	0.988378	0.978039	0.990451	0.219637	0.219178	0.221959
8.09	1993	-43	-42	-44	0.36	0.549053	0.987922	0.977235	0.990092	0.200076	0.199637	0.202264
8.61	1992	-42	-41	-43	0.52	0.550627	0.987097	0.975702	0.989407	0.290069	0.289391	0.293456
9.11	1991	-41	-40	-42	0.5	0.55073	0.986221	0.974064	0.988624	0.279212	0.278534	0.282697
9.35	1990	-40	-39	-41	0.24	0.550758	0.985816	0.973142	0.988208	0.134084	0.133759	0.13583
9.54	1989	-39	-38	-40	0.19	0.550758	0.985388	0.972339	0.987793	0.106196	0.105937	0.107621
10	1988	-38	-37	-39	0.46	0.550758	0.983958	0.970395	0.986808	0.257479	0.256736	0.261078
10.41	1987	-37	-36	-38	0.41	0.573086	0.983351	0.969375	0.986316	0.238944	0.238225	0.242388
10.71	1986	-36	-35	-37	0.3	0.573086	0.982891	0.968729	0.986051	0.174919	0.174358	0.177476
11.04	1985	-35	-34	-36	0.33	0.573086	0.982258	0.967486	0.985493	0.192534	0.191902	0.195474
11.37	1984	-34	-33	-35	0.33	0.581882	0.981572	0.966223	0.984851	0.195626	0.194975	0.198734
11.78	1983	-33	-32	-34	0.41	0.581882	0.980768	0.964956	0.984194	0.24325	0.242403	0.247236
12.11	1982	-32	-31	-33	0.33	0.581882	0.980145	0.96393	0.983709	0.195911	0.195201	0.199206
12.54	1981	-31	-30	-32	0.43	0.593385	0.979305	0.962515	0.983041	0.260547	0.259557	0.265092
13.09	1980	-30	-29	-31	0.55	0.593385	0.978087	0.960562	0.982045	0.333673	0.332329	0.339761
13.43	1979	-29	-28	-30	0.34	0.600827	0.977405	0.959332	0.981485	0.209004	0.208135	0.212941
13.76	1978	-28	-27	-29	0.33	0.600827	0.976565	0.957872	0.980798	0.203031	0.202155	0.206993
14.04	1977	-27	-26	-28	0.28	0.600827	0.975626	0.956575	0.980053	0.172435	0.171656	0.175869
14.27	1976	-26	-25	-27	0.23	0.601504	0.975099	0.955742	0.979584	0.141879	0.141229	0.144752
14.65	1975	-25	-24	-26	0.38	0.601504	0.974344	0.954451	0.978942	0.23459	0.233488	0.23948
14.9	1974	-24	-23	-25	0.25	0.601504	0.973871	0.95372	0.978543	0.154411	0.153673	0.157673
15.37	1973	-23	-22	-24	0.47	0.620449	0.973124	0.952361	0.977908	0.299665	0.298199	0.306198
15.84	1972	-22	-21	-23	0.47	0.620449	0.972089	0.950851	0.977105	0.299984	0.298444	0.306684
16.14	1971	-21	-20	-22	0.3	0.620449	0.971563	0.949827	0.97668	0.191583	0.190579	0.195967
16.46	1970	-20	-19	-21	0.32	0.621802	0.970657	0.948388	0.975987	0.204992	0.203872	0.209805
16.59	1969	-19	-18	-20	0.13	0.621802	0.97027	0.947762	0.975665	0.0833111	0.0828504	0.0852896
16.97	1968	-18	-17	-20	0.38	0.621802	0.969257	0.946349	0.974768	0.243779	0.242401	0.24968
17.3	1967	-17	-16	-19	0.33	0.633304	0.968537	0.945191	0.97422	0.21578	0.214521	0.221109
17.79	1966	-16	-15	-17	0.49	0.633304	0.967186	0.943952	0.973554	0.320847	0.318749	0.328745
18.2	1965	-15	-14	-16	0.41	0.633304	0.96626	0.942492	0.972881	0.268721	0.266893	0.275498
18.77	1964	-14	-13	-15	0.57	0.640747	0.964513	0.939981	0.971656	0.378663	0.37588	0.388546
19.14	1963	-13	-12	-14	0.37	0.640747	0.963107	0.938137	0.970724	0.246158	0.244226	0.25271
19.46	1962	-12	-11	-13	0.32	0.649543	0.962202	0.93654	0.969796	0.216019	0.214327	0.221938
20.04	1961	-11	-10	-12	0.58	0.649543	0.960994	0.934107	0.968429	0.392026	0.389017	0.40331
20.41	1960	-10	-9	-11	0.37	0.653603	0.960146	0.9322	0.967481	0.251871	0.249962	0.259422
20.74	1959	-9	-8	-10	0.33	0.653603	0.959248	0.93085	0.966553	0.224852	0.223153	0.231712
21.11	1958	-8	-7	-9	0.37	0.653603	0.958351	0.929312	0.965777	0.252343	0.250403	0.260228
21.44	1957	-7	-6	-8	0.33	0.659015	0.957512	0.92804	0.965056	0.227125	0.22535	0.234338
21.71	1956	-6	-5	-7	0.27	0.659015	0.956833	0.927159	0.964482	0.185962	0.184487	0.191913
21.9	1955	-5	-4	-6	0.19	0.659015	0.956408	0.926603	0.96411	0.13092	0.129874	0.135131
22.17	1954	-4	-3	-5	0.27	0.667135	0.955891	0.925845	0.96365	0.188438	0.186921	0.194554
22.47	1953	-3	-2	-4	0.3	0.667135	0.955418	0.924897	0.963278	0.209479	0.20777	0.216392
22.69	1952	-2	-1	-3	0.22	0.667135	0.954941	0.924109	0.96291	0.153695	0.152423	0.158823
23.1	1951	-1	0	-2	0.41	0.667135	0.95396	0.922839	0.962147	0.286726	0.284286	0.296395
23.34	1950	0	1	-1	0.24	0.669841	0.953586	0.921855	0.961791	0.168587	0.167148	0.17439
23.8	1949	1	3	0	0.46	0.669841	0.952789	0.920021	0.96075	0.323395	0.320715	0.334913
24.14	1948	2	4	1	0.34	0.669841	0.952032	0.918502	0.960089	0.239221	0.237213	0.247954
24.34	1947	3	5	2	0.2	0.671194	0.951492	0.917848	0.95949	0.141083	0.139907	0.146254
24.62	1946	4	6	3	0.28	0.671194	0.950665	0.916995	0.958844	0.197687	0.196001	0.204946
25.07	1945	5	7	4	0.45	0.671194	0.949486	0.915067	0.958139	0.318106	0.315233	0.330071
25.58	1944	6	8	5	0.51	0.689463	0.948345	0.912297	0.956835	0.370779	0.367489	0.385429
25.97	1943	7	9	6	0.39	0.689463	0.947566	0.910852	0.955566	0.28377	0.281394	0.295208
26.19	1942	8	10	7	0.22	0.685403	0.947201	0.910016	0.954982	0.159194	0.157897	0.165699
26.5	1941	9	11	8	0.31	0.685403	0.946559	0.90895	0.954492	0.224471	0.222605	0.233759
26.79	1940	10	12	9	0.29	0.685403	0.945721	0.907656	0.953866	0.210175	0.20838	0.218989
27.18	1939	11	13	10	0.39	0.685403	0.944701	0.906173	0.953003	0.282954	0.280489	0.294985
27.45	1938	12	14	11	0.27	0.696905	0.944057	0.905226	0.952319	0.199315	0.197585	0.207865
27.74	1937	13	15	12	0.29	0.696905	0.943443	0.904323	0.95175	0.214218	0.212348	0.223485
27.95	1936	14	16	12	0.21	0.696905	0.942922	0.903511	0.951378	0.155209	0.15383	0.161979
28.26	1935	15	17	13	0.31	0.703672	0.94197	0.902396	0.950824	0.231576	0.22942	0.241732
28.53	1934	16	18	14	0.27	0.703672	0.941227	0.901401	0.95022	0.201855	0.199945	0.210773
28.81	1933	17	19	15	0.28	0.703672	0.940551	0.900205	0.94966	0.209481	0.207472	0.21887
29.17	1932	18	20	16	0.36	0.703672	0.93969	0.898645	0.948904	0.26958	0.266963	0.281893
29.55	1931	19	21	17	0.38	0.710438	0.938782	0.89715	0.947879	0.287571	0.284811	0.300916
29.76	1930	20	22	18	0.21	0.710438	0.938225	0.896224	0.94735	0.159015	0.157483	0.166467
30.14	1929	21	23	19	0.38	0.710438	0.937112	0.894596	0.94657	0.288083	0.285205	0.301775
30.47	1928	22	24	20	0.33	0.713144	0.936565	0.893335	0.945844	0.251277	0.248812	0.263437
30.8	1927	23	25	21	0.33	0.713144	0.935843	0.892	0.945258	0.251471	0.248967	0.263831
31.04	1926	24	26	22	0.24	0.713144	0.93538	0.891167	0.944856	0.182979	0.181144	0.192057
31.41	1925	25	27	23	0.37	0.71788	0.934683	0.88983	0.944233	0.284177	0.281303	0.298502
31.64	1924	26	28	24	0.23	0.71788	0.934179	0.888994	0.943907	0.176746	0.174924	0.185729
31.86	1923	27	29	25	0.22	0.71788	0.93353	0.888269	0.943384	0.169179	0.167412	0.177799
32.2	1922	28	30	26	0.34	0.723293	0.932957	0.886952	0.942745	0.263592	0.260855	0.277264
32.39	1921	29	31	27	0.19	0.723293	0.932702	0.88617	0.942511	0.147342	0.145808	0.155078
32.67	1920	30	32	28	0.28	0.723293	0.931979	0.885031	0.942043	0.217303	0.214982	0.22883
33.02	1919	31	33	29	0.35	0.723293	0.930807	0.883714	0.941066	0.271971	0.269006	0.286464
33.27	1918	32	34	30	0.25	0.728029	0.930285	0.882886	0.940549	0.195647	0.193512	0.20615
33.64	1917	33	35	31	0.37	0.728029	0.929424	0.881392	0.939825	0.289826	0.286618	0.30562
33.81	1916	34	36	32	0.17	0.728029	0.929037	0.880552	0.939506	0.133219	0.131734	0.140554
34.07	1915	35	37	33	0.26	0.728029	0.928389	0.879269	0.93899	0.203888	0.201586	0.215278
34.38	1914	36	38	34	0.31	0.731412	0.927419	0.878093	0.938265	0.244483	0.241656	0.258216
34.79	1913	37	39	35	0.41	0.731412	0.926244	0.876658	0.937114	0.323758	0.320003	0.342071
35.14	1912	38	40	37	0.35	0.731412	0.925076	0.87523	0.936295	0.276728	0.273412	0.292488
35.32	1911	39	41	38	0.18	0.736825	0.924702	0.874431	0.935791	0.143428	0.141729	0.151674
35.6	1910	40	42	39	0.28	0.736825	0.924097	0.873186	0.935293	0.223257	0.220584	0.236274
35.82	1909	41	43	40	0.22	0.736825	0.923416	0.872368	0.934882	0.175546	0.173393	0.185818
36.21	1908	42	44	41	0.39	0.749004	0.92198	0.870719	0.933708	0.316831	0.312851	0.335483
36.48	1907	43	44	42	0.27	0.749004	0.921405	0.869503	0.932994	0.219481	0.216755	0.232582
36.82	1906	44	45	43	0.34	0.749004	0.920689	0.868089	0.932386	0.276599	0.273129	0.293359
37	1905	45	46	44	0.18	0.749004	0.920307	0.867316	0.932064	0.146495	0.144647	0.155446
37.4	1904	46	47	45	0.4	0.753064	0.919342	0.865494	0.93134	0.327653	0.323432	0.348039
37.68	1903	47	48	46	0.28	0.753064	0.91832	0.86428	0.93069	0.229613	0.226561	0.243969
37.97	1902	48	49	47	0.29	0.753064	0.917593	0.863155	0.929728	0.238001	0.234895	0.253012
38.3	1901	49	50	48	0.33	0.756447	0.916281	0.861977	0.928998	0.272436	0.268706	0.289599
38.56	1900	50	51	49	0.26	0.756447	0.91557	0.861247	0.928146	0.214813	0.211902	0.228362
38.95	1899	51	53	50	0.39	0.756447	0.914209	0.85993	0.927064	0.322699	0.318224	0.343068
39.19	1898	52	54	51	0.24	0.767273	0.913523	0.859017	0.926422	0.201577	0.198771	0.214368
39.5	1897	53	55	52	0.31	0.767273	0.912456	0.857751	0.925682	0.260675	0.256951	0.2773
39.72	1896	54	56	53	0.22	0.767273	0.911656	0.857103	0.924983	0.185158	0.18249	0.196942
39.89	1895	55	57	54	0.17	0.767273	0.91108	0.856582	0.924458	0.143167	0.141095	0.152275
40.08	1894	56	58	55	0.19	0.767273	0.910481	0.855951	0.9239	0.160115	0.15779	0.170316
40.34	1893	57	59	56	0.26	0.767273	0.909683	0.855021	0.923207	0.219297	0.216085	0.233317
40.6	1892	58	60	57	0.26	0.767273	0.908938	0.854054	0.922539	0.219477	0.216241	0.233581
40.95	1891	59	61	58	0.35	0.767273	0.908067	0.852398	0.921711	0.295733	0.291355	0.315047
41.07	1890	60	61	59	0.12	0.781481	0.907818	0.85181	0.921439	0.1033	0.101773	0.110092
41.26	1889	61	62	60	0.19	0.781481	0.907355	0.851106	0.921104	0.163642	0.1612	0.174457
41.51	1888	62	63	61	0.25	0.781481	0.906577	0.850273	0.9206	0.215503	0.212221	0.229774
41.72	1887	63	64	62	0.21	0.781481	0.905994	0.849476	0.92005	0.181139	0.178372	0.193191
42.02	1886	64	65	63	0.3	0.781481	0.905338	0.848359	0.919352	0.258958	0.255011	0.276351
42.34	1885	65	66	64	0.32	0.775392	0.904362	0.847185	0.918769	0.274365	0.270063	0.292882
42.69	1884	66	67	64	0.35	0.775392	0.903553	0.845533	0.917867	0.300356	0.295672	0.320966
42.83	1883	67	68	65	0.14	0.775392	0.903212	0.84478	0.917604	0.120188	0.118303	0.128501
43.1	1882	68	69	66	0.27	0.775392	0.90234	0.843639	0.917052	0.232014	0.228292	0.248158
43.35	1881	69	70	67	0.25	0.790277	0.901616	0.842754	0.916359	0.219128	0.215603	0.234433
43.59	1880	70	72	68	0.24	0.790277	0.900793	0.841867	0.915771	0.210555	0.207111	0.225293
43.83	1879	71	73	69	0.24	0.790277	0.900146	0.841014	0.915086	0.210706	0.207266	0.225521
44.04	1878	72	74	70	0.21	0.790277	0.899538	0.840131	0.91459	0.184493	0.181456	0.197538
44.6	1877	73	75	71	0.56	0.786894	0.89782	0.838118	0.913199	0.490812	0.482546	0.525774
44.78	1876	74	76	72	0.18	0.786894	0.897311	0.837613	0.912722	0.157851	0.155185	0.169101
45.02	1875	75	77	73	0.24	0.786894	0.896673	0.836562	0.912127	0.210617	0.207049	0.225751
45.21	1874	76	78	74	0.19	0.779452	0.896188	0.83563	0.911689	0.165251	0.162441	0.177226
45.51	1873	77	79	75	0.3	0.779452	0.894659	0.834312	0.911037	0.261368	0.25667	0.280273
45.69	1872	78	80	76	0.18	0.779452	0.89408	0.833543	0.910368	0.156922	0.154115	0.168319
46.07	1871	79	81	77	0.38	0.779452	0.893148	0.832257	0.909098	0.331627	0.325808	0.35589
46.2	1870	80	82	77	0.13	0.79569	0.892815	0.831675	0.908825	0.115858	0.113817	0.124375
46.4	1869	81	83	78	0.2	0.79569	0.892182	0.830974	0.908393	0.17837	0.175186	0.191508
46.59	1868	82	84	79	0.19	0.79569	0.891572	0.830222	0.90798	0.169567	0.166503	0.182097
47	1867	83	85	81	0.41	0.79569	0.890117	0.828756	0.906888	0.366506	0.359728	0.393642
47.24	1866	84	87	82	0.24	0.796367	0.889704	0.827919	0.906132	0.214822	0.210927	0.230853
47.55	1865	85	88	83	0.31	0.796367	0.888966	0.82668	0.905514	0.277709	0.272634	0.298633
47.75	1864	86	89	84	0.2	0.796367	0.888562	0.826082	0.905105	0.179248	0.175972	0.192806
47.96	1863	87	90	85	0.21	0.796367	0.888156	0.825338	0.904722	0.188297	0.184849	0.202628
48.27	1862	88	91	86	0.31	0.804486	0.887102	0.82413	0.904209	0.28113	0.275811	0.302611
48.44	1861	89	92	87	0.17	0.804486	0.886592	0.823535	0.903731	0.154257	0.151331	0.166068
48.75	1860	90	93	88	0.31	0.804486	0.88552	0.822541	0.902911	0.281632	0.276207	0.303196
48.93	1859	91	94	89	0.18	0.804486	0.885069	0.821941	0.902355	0.163612	0.160477	0.176177
49.1	1858	92	94	89	0.17	0.811252	0.884658	0.821199	0.901902	0.155894	0.152913	0.167941
49.41	1857	93	95	90	0.31	0.811252	0.883555	0.819976	0.901255	0.284632	0.279042	0.306702
49.61	1856	94	97	91	0.2	0.811252	0.883092	0.819218	0.900702	0.18373	0.180138	0.198055
49.77	1855	95	97	92	0.16	0.811252	0.882395	0.818437	0.900219	0.1471	0.144187	0.158595
50.04	1854	96	98	93	0.27	0.811252	0.881335	0.817394	0.899577	0.24853	0.24349	0.267971
50.28	1853	97	99	94	0.24	0.817342	0.880436	0.816562	0.898827	0.222801	0.218242	0.240229
50.49	1852	98	100	94	0.21	0.817342	0.879831	0.815794	0.898448	0.195085	0.191043	0.210398
50.66	1851	99	101	95	0.17	0.817342	0.879449	0.815133	0.898095	0.157994	0.154714	0.170461
50.87	1850	100	102	96	0.21	0.817342	0.878899	0.814312	0.897522	0.195292	0.19124	0.210781
51.2	1849	101	103	97	0.33	0.825461	0.877817	0.813008	0.896669	0.310318	0.303793	0.335054
51.39	1848	102	104	98	0.19	0.825461	0.877282	0.81231	0.896219	0.178777	0.174999	0.193076
51.63	1847	103	105	99	0.24	0.825461	0.876699	0.811398	0.895461	0.225973	0.221239	0.24416
51.98	1846	104	107	100	0.35	0.825461	0.875739	0.810119	0.894672	0.329906	0.322924	0.356628
52.14	1845	105	108	101	0.16	0.832227	0.875108	0.809443	0.894269	0.15216	0.1489	0.164504
52.38	1844	106	109	102	0.24	0.832227	0.874407	0.808346	0.893738	0.228423	0.223482	0.24709
52.58	1843	107	110	103	0.2	0.832227	0.873792	0.807407	0.893239	0.190486	0.186339	0.206148
52.83	1842	108	111	104	0.25	0.832227	0.872751	0.806196	0.892565	0.238392	0.2331	0.258072
53.09	1841	109	112	105	0.26	0.832227	0.872112	0.804866	0.891872	0.248109	0.242612	0.268838
53.34	1840	110	113	106	0.25	0.821694	0.871337	0.803593	0.891353	0.235757	0.230463	0.255631
53.52	1839	111	114	107	0.18	0.821694	0.870858	0.802739	0.890885	0.169838	0.16602	0.18425
53.78	1838	112	115	108	0.26	0.821694	0.870105	0.80171	0.890203	0.245534	0.239991	0.266481
54.02	1837	113	116	109	0.24	0.821694	0.869182	0.800799	0.88968	0.226888	0.22166	0.246262
54.21	1836	114	117	110	0.19	0.84346	0.868578	0.800076	0.889137	0.184506	0.180239	0.200303
54.51	1835	115	119	111	0.3	0.84346	0.867734	0.798727	0.888199	0.291608	0.284889	0.316802
54.8	1834	116	120	112	0.29	0.84346	0.866838	0.797291	0.88725	0.282179	0.275687	0.306793
55.11	1833	117	121	113	0.31	0.84346	0.865972	0.7958	0.886253	0.301941	0.295032	0.328566
55.41	1832	118	122	114	0.3	0.840346	0.864812	0.794637	0.885511	0.291513	0.284699	0.317257
55.76	1831	119	123	115	0.35	0.840346	0.863401	0.793083	0.884543	0.340654	0.332512	0.370858
56.06	1830	120	124	116	0.3	0.840346	0.862197	0.791906	0.88352	0.292397	0.28534	0.318351
56.36	1829	121	125	117	0.3	0.851849	0.860921	0.790548	0.882634	0.296839	0.289536	0.323263
56.58	1828	122	126	118	0.22	0.851849	0.860039	0.7898	0.882045	0.217905	0.212468	0.237284
56.81	1827	123	127	119	0.23	0.851849	0.859194	0.789111	0.881153	0.228034	0.222351	0.248286
57.02	1826	124	128	120	0.21	0.851849	0.858543	0.788373	0.88054	0.208363	0.203157	0.226908
57.27	1825	125	129	121	0.25	0.847789	0.857787	0.787507	0.879613	0.247086	0.240955	0.269137
57.65	1824	126	130	122	0.38	0.847789	0.856424	0.786346	0.878649	0.376169	0.366654	0.409692
57.89	1823	127	131	123	0.24	0.847789	0.85528	0.785445	0.877915	0.237898	0.231764	0.25905
58.26	1822	128	133	125	0.37	0.855232	0.854115	0.784041	0.876943	0.370484	0.36084	0.403596
58.46	1821	129	134	126	0.2	0.855232	0.853734	0.783306	0.876373	0.200351	0.195175	0.218365
58.7	1820	130	135	127	0.24	0.855232	0.853075	0.782445	0.875541	0.240607	0.234433	0.262326
59.01	1819	131	136	128	0.31	0.855232	0.851972	0.78152	0.874944	0.311186	0.303016	0.339238
59.21	1818	132	137	128	0.2	0.863216	0.851232	0.7809	0.874553	0.202816	0.197407	0.221082
59.46	1817	133	138	129	0.25	0.863216	0.850439	0.77998	0.874009	0.253756	0.246913	0.276679
59.79	1816	134	139	130	0.33	0.863216	0.849093	0.778691	0.873168	0.335489	0.326239	0.36582
59.97	1815	135	140	131	0.18	0.863216	0.848621	0.778095	0.872862	0.183096	0.178011	0.199691
60.12	1814	136	141	132	0.15	0.866734	0.848261	0.777553	0.872607	0.153267	0.14899	0.167204
60.32	1813	137	142	133	0.2	0.866734	0.847771	0.776766	0.872146	0.204474	0.198759	0.223165
60.5	1812	138	143	134	0.18	0.866734	0.84729	0.776132	0.871559	0.184131	0.179004	0.201012
60.75	1811	139	144	135	0.25	0.866734	0.846519	0.775275	0.870959	0.25597	0.248787	0.279493
60.89	1810	140	145	136	0.14	0.866734	0.846037	0.774721	0.870684	0.143425	0.139365	0.156628
61.04	1809	141	146	137	0.15	0.866734	0.845706	0.774213	0.870299	0.15373	0.149386	0.167925
61.34	1808	142	147	138	0.3	0.850495	0.845075	0.773265	0.869582	0.301924	0.293415	0.329963
61.56	1807	143	148	139	0.22	0.850495	0.844637	0.772461	0.869245	0.221526	0.215255	0.242224
61.73	1806	144	149	140	0.17	0.850495	0.844259	0.7719	0.868866	0.171256	0.166406	0.18731
61.97	1805	145	150	141	0.24	0.850495	0.843466	0.771104	0.868301	0.242	0.235078	0.26471
62.16	1804	146	151	142	0.19	0.859291	0.842991	0.770278	0.867806	0.193674	0.188136	0.211956
62.28	1803	147	152	142	0.12	0.859291	0.842539	0.769662	0.867472	0.122386	0.118868	0.133974
62.49	1802	148	153	143	0.21	0.859291	0.841692	0.768569	0.866876	0.214391	0.208162	0.234788
62.69	1801	149	154	144	0.2	0.859291	0.840982	0.767681	0.866522	0.204354	0.198331	0.223867
62.93	1800	150	155	145	0.24	0.859291	0.84033	0.766601	0.865893	0.245415	0.23817	0.269018
63.18	1799	151	156	146	0.25	0.869233	0.83951	0.76543	0.865228	0.258851	0.251157	0.283904
63.33	1798	152	157	147	0.15	0.869233	0.838961	0.764876	0.864944	0.155413	0.150744	0.170465
63.56	1797	153	158	148	0.23	0.869233	0.838265	0.76393	0.864333	0.238497	0.231304	0.261704
63.8	1796	154	159	149	0.24	0.869233	0.837586	0.76309	0.863758	0.249068	0.241521	0.273383
63.96	1795	155	160	150	0.16	0.869233	0.837042	0.762604	0.863469	0.166153	0.161068	0.182372
64.2	1794	156	161	151	0.24	0.874283	0.836314	0.761751	0.862921	0.250896	0.24316	0.275455
64.4	1793	157	162	152	0.2	0.874283	0.835735	0.760764	0.862408	0.209225	0.202754	0.229843
64.55	1792	158	163	153	0.15	0.874283	0.835225	0.759983	0.862088	0.157015	0.152122	0.17256
64.76	1791	159	164	154	0.21	0.874283	0.834621	0.759073	0.861667	0.219979	0.213075	0.241873
64.98	1790	160	165	155	0.22	0.874283	0.834091	0.758227	0.861049	0.230601	0.223381	0.253674
65.13	1789	161	166	156	0.15	0.87147	0.833625	0.75769	0.860503	0.15681	0.151912	0.172525
65.33	1788	162	167	157	0.2	0.87147	0.832979	0.757156	0.859731	0.209242	0.202731	0.230196
65.64	1787	163	168	158	0.31	0.87147	0.832189	0.756062	0.858748	0.324633	0.314593	0.35732
65.97	1786	164	169	159	0.33	0.87147	0.830929	0.754898	0.857632	0.346101	0.335325	0.380959
66.26	1785	165	171	160	0.29	0.868087	0.829577	0.753828	0.856803	0.303462	0.293819	0.333956
66.47	1784	166	172	161	0.21	0.868087	0.828758	0.753023	0.856263	0.219966	0.2129	0.242088
66.81	1783	167	173	162	0.34	0.868087	0.82735	0.751737	0.855385	0.356741	0.345049	0.392623
67.05	1782	168	174	164	0.24	0.868087	0.826455	0.750621	0.854896	0.25209	0.243703	0.277558
67.25	1781	169	175	165	0.2	0.868764	0.82585	0.74991	0.854463	0.210393	0.203347	0.231698
67.52	1780	170	176	166	0.27	0.868764	0.824863	0.74908	0.853382	0.28437	0.274867	0.313139
67.68	1779	171	177	167	0.16	0.868764	0.824426	0.748684	0.852828	0.168605	0.16299	0.185662
67.85	1778	172	178	168	0.17	0.868764	0.823411	0.748257	0.852358	0.179363	0.173272	0.197378
68.03	1777	173	179	168	0.18	0.868764	0.822551	0.747649	0.851857	0.190113	0.183572	0.209159
68.4	1776	174	180	169	0.37	0.885002	0.821122	0.746145	0.850992	0.398785	0.384787	0.438857
68.69	1775	175	181	170	0.29	0.885002	0.820031	0.744771	0.85043	0.312977	0.301789	0.344603
68.9	1774	176	182	171	0.21	0.885002	0.819515	0.743909	0.84993	0.226781	0.218666	0.24983
69.15	1773	177	183	172	0.25	0.874853	0.818919	0.743	0.849242	0.267076	0.25754	0.294365
69.32	1772	178	184	173	0.17	0.874853	0.818349	0.742431	0.848788	0.181738	0.17522	0.200322
69.44	1771	179	185	174	0.12	0.874853	0.81803	0.742054	0.848521	0.128336	0.123724	0.141475
69.66	1770	180	186	175	0.22	0.874853	0.817257	0.741332	0.847959	0.235504	0.226978	0.259624
69.83	1769	181	187	176	0.17	0.874853	0.816691	0.740741	0.847582	0.182107	0.17547	0.200779
70.1	1768	182	188	177	0.27	0.874853	0.815866	0.739578	0.846842	0.289521	0.278931	0.319385
70.28	1767	183	189	178	0.18	0.895151	0.815323	0.738814	0.846143	0.197624	0.190426	0.218089
70.49	1766	184	190	179	0.21	0.895151	0.814664	0.738122	0.845589	0.230748	0.222309	0.254676
70.67	1765	185	191	180	0.18	0.895151	0.813894	0.737438	0.845103	0.197971	0.19066	0.218496
70.89	1764	186	192	181	0.22	0.895151	0.812972	0.736631	0.844717	0.242239	0.233135	0.267343
71.21	1763	187	193	182	0.32	0.883649	0.811635	0.735509	0.844162	0.348393	0.334969	0.384452
71.42	1762	188	194	183	0.21	0.883649	0.810849	0.734738	0.843771	0.228854	0.219925	0.252561
71.64	1761	189	195	184	0.22	0.883649	0.810092	0.734044	0.843152	0.239976	0.230567	0.264838
71.76	1760	190	196	184	0.12	0.883649	0.809702	0.733614	0.842797	0.130959	0.125817	0.144542
71.91	1759	191	197	185	0.15	0.883649	0.808975	0.733149	0.842302	0.163846	0.157363	0.180792
72.02	1758	192	198	186	0.11	0.883649	0.808461	0.732777	0.841922	0.12023	0.115452	0.132648
72.24	1757	193	199	187	0.22	0.885002	0.807559	0.731902	0.841133	0.241098	0.231474	0.26602
72.48	1756	194	200	188	0.24	0.885002	0.806716	0.730841	0.840426	0.26329	0.25273	0.290625
72.75	1755	195	201	189	0.27	0.885002	0.805909	0.729773	0.839766	0.296498	0.284544	0.327432
73.05	1754	196	202	190	0.3	0.885002	0.805029	0.728554	0.839113	0.329803	0.316406	0.364421
73.31	1753	197	203	191	0.26	0.889062	0.804233	0.727267	0.838462	0.287424	0.275691	0.317842
73.5	1752	198	204	192	0.19	0.889062	0.803643	0.726408	0.838004	0.210195	0.201576	0.232544
73.7	1751	199	205	193	0.2	0.889062	0.802987	0.725629	0.837345	0.221439	0.212352	0.245046
73.86	1750	200	206	194	0.16	0.889062	0.802527	0.724995	0.83671	0.177252	0.170011	0.196208
74.07	1749	201	207	195	0.21	0.889062	0.801996	0.72421	0.836266	0.232798	0.223258	0.257802
74.24	1748	202	208	196	0.17	0.894475	0.801459	0.723656	0.83584	0.18973	0.181926	0.210128
74.49	1747	203	209	197	0.25	0.894475	0.8006	0.722872	0.835157	0.279314	0.267756	0.309348
74.81	1746	204	210	198	0.32	0.894475	0.799468	0.721859	0.83426	0.358028	0.343097	0.39652
74.97	1745	205	211	199	0.16	0.894475	0.799011	0.721433	0.833884	0.179116	0.171626	0.198377
75.17	1744	206	212	200	0.2	0.893122	0.798439	0.720707	0.83333	0.223717	0.21435	0.247846
75.39	1743	207	213	201	0.22	0.893122	0.797861	0.719803	0.832813	0.246267	0.235931	0.272973
75.65	1742	208	214	202	0.26	0.893122	0.796998	0.718797	0.832154	0.291358	0.279049	0.323056
75.8	1741	209	215	203	0.15	0.893122	0.796606	0.718225	0.83184	0.168174	0.16105	0.186527
76.04	1740	210	216	204	0.24	0.893122	0.795835	0.717294	0.831193	0.269339	0.257881	0.29883
76.2	1739	211	217	205	0.16	0.882296	0.795147	0.716687	0.830636	0.177536	0.169951	0.196972
76.44	1738	212	218	206	0.24	0.882296	0.794095	0.715775	0.829798	0.266657	0.255184	0.295834
76.59	1737	213	219	207	0.15	0.882296	0.79363	0.715253	0.829388	0.166758	0.159569	0.185032
76.77	1736	214	220	208	0.18	0.882296	0.792979	0.714663	0.82886	0.200274	0.191605	0.222221
77.03	1735	215	221	209	0.26	0.882296	0.791907	0.713824	0.828004	0.289677	0.277048	0.321363
77.34	1734	216	222	210	0.31	0.917479	0.790431	0.71265	0.826782	0.359827	0.344007	0.3991
77.55	1733	217	223	211	0.21	0.917479	0.789584	0.711871	0.826065	0.244015	0.233239	0.270654
77.78	1732	218	224	212	0.23	0.917479	0.788819	0.711063	0.825445	0.267514	0.255644	0.296767
78.03	1731	219	225	213	0.25	0.917479	0.78784	0.710199	0.824596	0.291137	0.27816	0.322966
78.32	1730	220	227	214	0.29	0.901917	0.786873	0.709163	0.823872	0.332399	0.317472	0.368823
78.65	1729	221	228	215	0.33	0.901917	0.785928	0.708211	0.823143	0.378702	0.361581	0.42026
78.9	1728	222	229	216	0.25	0.901917	0.78526	0.707361	0.82245	0.28714	0.274156	0.318761
79.1	1727	223	230	217	0.2	0.903271	0.784851	0.706441	0.822099	0.230176	0.219748	0.255724
79.38	1726	224	231	218	0.28	0.903271	0.783675	0.705493	0.821339	0.322731	0.307931	0.358495
79.58	1725	225	232	219	0.2	0.903271	0.782894	0.70473	0.820636	0.230752	0.220139	0.256345
79.76	1724	226	233	220	0.18	0.903271	0.782193	0.704096	0.82012	0.207863	0.19825	0.230918
79.91	1723	227	234	221	0.15	0.903271	0.781484	0.703554	0.81969	0.173376	0.165295	0.19258
80.16	1722	228	235	222	0.25	0.901241	0.780778	0.702683	0.81891	0.288572	0.275134	0.320643
80.3	1721	229	236	223	0.14	0.901241	0.780299	0.702324	0.818472	0.161699	0.154158	0.179652
80.42	1720	230	237	224	0.12	0.901241	0.779843	0.701892	0.818097	0.13868	0.132196	0.154082
80.7	1719	231	238	225	0.28	0.901241	0.778807	0.700845	0.817272	0.324018	0.308768	0.360062
80.97	1718	232	239	226	0.27	0.901241	0.77802	0.699999	0.816487	0.312762	0.298027	0.347622
81.17	1717	233	240	227	0.2	0.903947	0.777402	0.699327	0.816022	0.232556	0.22155	0.258519
81.41	1716	234	241	228	0.24	0.903947	0.776507	0.698719	0.815429	0.279389	0.266053	0.310493
81.65	1715	235	242	229	0.24	0.903947	0.775621	0.697939	0.814671	0.279708	0.266301	0.31084
81.89	1714	236	243	230	0.24	0.903947	0.774797	0.697225	0.813927	0.280005	0.266544	0.311158
82.11	1713	237	244	231	0.22	0.905301	0.774031	0.696608	0.813317	0.25731	0.244881	0.285908
82.35	1712	238	245	232	0.24	0.905301	0.773243	0.69575	0.812626	0.280988	0.26737	0.312285
82.55	1711	239	246	233	0.2	0.905301	0.77245	0.694946	0.812102	0.234397	0.222953	0.260538
82.71	1710	240	247	234	0.16	0.905301	0.771931	0.694366	0.811685	0.187644	0.178454	0.208605
82.91	1709	241	248	235	0.2	0.905301	0.771227	0.693751	0.811034	0.234769	0.223246	0.260987
83.16	1708	242	249	236	0.25	0.897181	0.770354	0.692909	0.810472	0.291159	0.276747	0.323701
83.4	1707	243	250	237	0.24	0.897181	0.769557	0.692111	0.809986	0.279802	0.265836	0.311111
83.61	1706	244	251	238	0.21	0.897181	0.768919	0.691392	0.80911	0.24503	0.232858	0.272505
83.82	1705	245	252	239	0.21	0.897181	0.768181	0.69072	0.808461	0.245265	0.233045	0.27277
84.05	1704	246	253	240	0.23	0.897181	0.767272	0.689783	0.807925	0.268942	0.255409	0.299155
84.21	1703	247	254	241	0.16	0.891768	0.766741	0.689228	0.80734	0.18609	0.176732	0.207019
84.48	1702	248	255	242	0.27	0.891768	0.765715	0.688395	0.806497	0.314448	0.298547	0.349766
84.66	1701	249	256	243	0.18	0.891768	0.765252	0.687871	0.806032	0.209759	0.199146	0.233355
84.81	1700	250	257	244	0.15	0.891768	0.764699	0.687317	0.805551	0.174925	0.166054	0.19462
84.96	1699	251	258	244	0.15	0.891768	0.764121	0.686717	0.805198	0.175058	0.166127	0.19479
85.34	1698	252	259	245	0.38	0.904624	0.762956	0.685399	0.804098	0.45056	0.427506	0.501543
85.53	1697	253	261	247	0.19	0.904624	0.762294	0.684652	0.803518	0.225475	0.213907	0.251045
85.7	1696	254	262	248	0.17	0.904624	0.761786	0.684014	0.80314	0.201876	0.191481	0.224829
85.98	1695	255	263	249	0.28	0.904624	0.761077	0.683092	0.80233	0.332811	0.315699	0.370806
86.21	1694	256	264	250	0.23	0.908007	0.76032	0.682303	0.801856	0.274676	0.260448	0.306083
86.4	1693	257	265	251	0.19	0.908007	0.759792	0.681592	0.80141	0.227064	0.215272	0.253115
86.64	1692	258	266	252	0.24	0.908007	0.759142	0.680676	0.800698	0.287063	0.272165	0.320155
86.79	1691	259	267	253	0.15	0.908007	0.758648	0.680192	0.800389	0.179531	0.170169	0.200239
87	1690	260	268	254	0.21	0.908007	0.757729	0.67946	0.799933	0.251649	0.238372	0.280637
87.29	1689	261	269	255	0.29	0.908684	0.756569	0.678631	0.79911	0.348307	0.329765	0.388308
87.44	1688	262	270	256	0.15	0.908684	0.756109	0.678164	0.798596	0.180268	0.170678	0.200988
87.63	1687	263	271	257	0.19	0.908684	0.755525	0.677545	0.797914	0.228516	0.216377	0.254817
87.87	1686	264	272	258	0.24	0.908684	0.754719	0.677	0.797223	0.28896	0.273555	0.322133
87.99	1685	265	273	259	0.12	0.908684	0.754309	0.676738	0.796958	0.144559	0.136823	0.161129
88.17	1684	266	274	260	0.18	0.91139	0.753638	0.676217	0.796451	0.217678	0.205977	0.2426
88.4	1683	267	275	260	0.23	0.91139	0.752968	0.675543	0.795742	0.278391	0.263427	0.310298
88.55	1682	268	276	261	0.15	0.91139	0.752261	0.675174	0.795351	0.18173	0.171885	0.202479
88.71	1681	269	276	262	0.16	0.91139	0.751616	0.674705	0.794822	0.194012	0.183465	0.216128
88.91	1680	270	277	263	0.2	0.91139	0.750912	0.67408	0.79433	0.242742	0.229474	0.27041
89.16	1679	271	278	264	0.25	0.91342	0.75021	0.673397	0.793422	0.304388	0.28781	0.339109
89.43	1678	272	279	265	0.27	0.91342	0.749295	0.672539	0.792597	0.32914	0.311158	0.366705
89.66	1677	273	281	266	0.23	0.91342	0.748411	0.671687	0.791985	0.28071	0.265266	0.312775
89.82	1676	274	282	267	0.16	0.91342	0.74772	0.671031	0.791616	0.195457	0.184619	0.217795
90.03	1675	275	283	268	0.21	0.91342	0.747005	0.6702	0.791014	0.256783	0.242497	0.28621
90.26	1674	276	284	269	0.23	0.91139	0.74597	0.66934	0.790179	0.281003	0.265281	0.313174
90.45	1673	277	285	270	0.19	0.91139	0.745301	0.668562	0.789538	0.232341	0.219323	0.25901
90.71	1672	278	286	271	0.26	0.91139	0.744378	0.667447	0.788881	0.318335	0.300377	0.355027
90.84	1671	279	286	272	0.13	0.91139	0.743996	0.666772	0.788336	0.159249	0.150292	0.177693
91.16	1670	280	287	273	0.32	0.912743	0.742744	0.665861	0.787265	0.393242	0.371003	0.438647
91.38	1669	281	289	274	0.22	0.912743	0.741682	0.665269	0.786635	0.270741	0.255269	0.301838
91.59	1668	282	290	275	0.21	0.912743	0.741019	0.664737	0.786006	0.258665	0.243861	0.288349
91.76	1667	283	290	276	0.17	0.912743	0.740362	0.664315	0.785401	0.209582	0.197563	0.233573
91.92	1666	284	291	277	0.16	0.912743	0.739789	0.663935	0.784892	0.197406	0.186062	0.21996
92.21	1665	285	292	278	0.29	0.910037	0.738983	0.663313	0.783908	0.357127	0.33666	0.397867
92.45	1664	286	293	279	0.24	0.910037	0.738052	0.662738	0.783157	0.295926	0.278882	0.329555
92.7	1663	287	295	280	0.25	0.910037	0.737144	0.662026	0.782452	0.308636	0.290764	0.343656
92.85	1662	288	295	281	0.15	0.910037	0.736731	0.661596	0.782112	0.185285	0.174534	0.206328
93.18	1661	289	296	282	0.33	0.916803	0.735676	0.660488	0.781122	0.411247	0.387321	0.458062
93.39	1660	290	298	283	0.21	0.916803	0.735199	0.659959	0.780669	0.261873	0.24662	0.291728
93.62	1659	291	299	284	0.23	0.916803	0.73434	0.65915	0.780243	0.287149	0.270255	0.319904
93.78	1658	292	300	285	0.16	0.916803	0.733848	0.658606	0.779901	0.199889	0.188086	0.222726
94.07	1657	293	301	286	0.29	0.916803	0.733015	0.657758	0.77905	0.362711	0.341278	0.404211
94.28	1656	294	302	287	0.21	0.910713	0.732208	0.657291	0.77864	0.261196	0.24562	0.290967
94.58	1655	295	303	288	0.3	0.910713	0.730931	0.656469	0.777746	0.373789	0.35129	0.416187
94.76	1654	296	304	289	0.18	0.910713	0.730398	0.655944	0.777289	0.224437	0.210898	0.249912
95	1653	297	305	290	0.24	0.910713	0.729798	0.655397	0.776744	0.299495	0.281394	0.333495
95.21	1652	298	306	291	0.21	0.916803	0.729087	0.654906	0.776128	0.264068	0.248063	0.293979
95.37	1651	299	307	292	0.16	0.916803	0.728617	0.654503	0.775588	0.201325	0.189132	0.224122
95.55	1650	300	308	293	0.18	0.916803	0.728155	0.654066	0.77495	0.226634	0.212949	0.252305
95.81	1649	301	309	294	0.26	0.916803	0.72703	0.6533	0.773902	0.327867	0.308009	0.364869
95.93	1648	302	310	295	0.12	0.916803	0.726376	0.652898	0.773467	0.151459	0.142238	0.168505
96.06	1647	303	310	295	0.13	0.916803	0.725482	0.652512	0.773045	0.164283	0.154175	0.182655
96.21	1646	304	311	296	0.15	0.903947	0.725021	0.652147	0.772434	0.187018	0.175539	0.207916
96.45	1645	305	312	297	0.24	0.903947	0.724431	0.651543	0.771497	0.299473	0.281203	0.332975
96.6	1644	306	313	298	0.15	0.903947	0.723909	0.65108	0.770926	0.187305	0.175882	0.208257
96.72	1643	307	314	299	0.12	0.903947	0.723546	0.650653	0.770312	0.14992	0.140818	0.166715
96.98	1642	308	315	300	0.26	0.903947	0.722858	0.649893	0.76924	0.325135	0.30553	0.361638
97.16	1641	309	316	301	0.18	0.914773	0.722434	0.649374	0.768887	0.227923	0.214153	0.253566
97.31	1640	310	317	302	0.15	0.914773	0.722121	0.649022	0.768478	0.190018	0.178555	0.21142
97.5	1639	311	318	303	0.19	0.914773	0.721613	0.648426	0.767951	0.240859	0.226326	0.268044
97.74	1638	312	319	304	0.24	0.914773	0.721016	0.647578	0.767417	0.304495	0.286084	0.339026
97.98	1637	313	320	305	0.24	0.914773	0.720264	0.646895	0.766903	0.304812	0.286275	0.339383
98.28	1636	314	322	306	0.3	0.914773	0.719338	0.646143	0.766328	0.381506	0.358113	0.424723
98.55	1635	315	323	307	0.27	0.914773	0.71823	0.645457	0.765758	0.343885	0.322542	0.382657
98.78	1634	316	324	308	0.23	0.914773	0.717604	0.645037	0.765202	0.293195	0.274957	0.326179
99.08	1633	317	325	309	0.3	0.914773	0.716678	0.644132	0.764347	0.382922	0.359041	0.426049
99.35	1632	318	326	310	0.27	0.912067	0.716011	0.643315	0.763529	0.34393	0.322526	0.382795
99.62	1631	319	327	311	0.27	0.912067	0.715131	0.642638	0.762697	0.344354	0.322878	0.383199
100.05	1630	320	328	313	0.43	0.912067	0.713936	0.641449	0.761228	0.549333	0.515205	0.61141
100.23	1629	321	330	314	0.18	0.90733	0.713349	0.64101	0.760786	0.228948	0.214672	0.254785
100.35	1628	322	331	314	0.12	0.90733	0.712941	0.640705	0.760388	0.152719	0.14319	0.169937
100.58	1627	323	332	315	0.23	0.90733	0.71228	0.640147	0.759911	0.292983	0.274619	0.325997
100.74	1626	324	333	316	0.16	0.90733	0.711907	0.639669	0.759492	0.203921	0.191145	0.22695
100.89	1625	325	334	317	0.15	0.90733	0.711562	0.639183	0.759099	0.191269	0.179291	0.212928
101.04	1624	326	335	318	0.15	0.90733	0.711181	0.638711	0.758668	0.191371	0.179393	0.213085
101.15	1623	327	335	319	0.11	0.916126	0.710831	0.638486	0.758339	0.141769	0.132888	0.157833
101.31	1622	328	336	320	0.16	0.916126	0.710341	0.638082	0.757919	0.206352	0.193398	0.22972
101.45	1621	329	337	321	0.14	0.916126	0.709795	0.637725	0.757641	0.180697	0.169285	0.201117
101.6	1620	330	338	322	0.15	0.916126	0.709199	0.637288	0.757326	0.193767	0.181453	0.215631
101.81	1619	331	339	323	0.21	0.916126	0.708605	0.63668	0.756861	0.2715	0.25419	0.302172
102	1618	332	340	324	0.19	0.916126	0.708088	0.636156	0.756389	0.245822	0.230125	0.273618
102.18	1617	333	341	325	0.18	0.91139	0.707618	0.635593	0.755965	0.231834	0.217008	0.258106
102.47	1616	334	342	326	0.29	0.91139	0.706452	0.634845	0.755024	0.374128	0.350059	0.416327
102.63	1615	335	343	327	0.16	0.91139	0.705873	0.63452	0.754455	0.206584	0.193282	0.229815
102.8	1614	336	344	328	0.17	0.91139	0.705324	0.634072	0.754145	0.219667	0.205446	0.244351
103.13	1613	337	345	329	0.33	0.91139	0.704324	0.633262	0.753317	0.427018	0.399246	0.474935
103.29	1612	338	347	330	0.16	0.91342	0.703738	0.632896	0.75275	0.207673	0.194151	0.230918
103.52	1611	339	348	331	0.23	0.91342	0.702727	0.632309	0.751937	0.298959	0.279394	0.332253
103.64	1610	340	349	332	0.12	0.91342	0.702322	0.632012	0.751595	0.156069	0.145837	0.173431
103.82	1609	341	350	333	0.18	0.91342	0.701705	0.631441	0.751077	0.234309	0.218906	0.260382
104	1608	342	351	334	0.18	0.91342	0.701171	0.630891	0.750605	0.234487	0.219044	0.260608
104.21	1607	343	352	335	0.21	0.916126	0.700576	0.6304	0.750015	0.274612	0.25651	0.305182
104.39	1606	344	353	336	0.18	0.916126	0.700068	0.629888	0.749298	0.235552	0.220076	0.261797
104.52	1605	345	354	337	0.13	0.916126	0.699761	0.629539	0.748824	0.170196	0.159045	0.18918
104.67	1604	346	355	338	0.15	0.916126	0.699457	0.629177	0.748377	0.196465	0.183623	0.218411
104.82	1603	347	356	339	0.15	0.916126	0.699072	0.628893	0.747975	0.196573	0.183721	0.218509
105	1602	348	357	340	0.18	0.916126	0.698253	0.628527	0.747447	0.236165	0.220621	0.262364
105.15	1601	349	357	340	0.15	0.912743	0.69768	0.628216	0.747089	0.196238	0.18326	0.217937
105.39	1600	350	358	342	0.24	0.912743	0.696939	0.627783	0.746468	0.314315	0.29346	0.34894
105.65	1599	351	360	343	0.26	0.912743	0.696217	0.627128	0.745946	0.340861	0.318137	0.378413
105.77	1598	352	361	344	0.12	0.912743	0.695822	0.626887	0.745718	0.15741	0.146877	0.174719
105.99	1597	353	362	344	0.22	0.912743	0.695028	0.626304	0.745065	0.288914	0.269512	0.320617
106.1	1596	354	363	345	0.11	0.917479	0.694688	0.625995	0.74462	0.145278	0.135536	0.16122
106.38	1595	355	364	346	0.28	0.917479	0.693908	0.625311	0.74374	0.370214	0.345408	0.410826
106.61	1594	356	365	347	0.23	0.917479	0.693183	0.62483	0.743132	0.304422	0.283961	0.337724
106.8	1593	357	366	348	0.19	0.917479	0.69247	0.624428	0.742695	0.251738	0.234714	0.279169
107	1592	358	367	349	0.2	0.917479	0.691423	0.623946	0.742127	0.265389	0.247257	0.294089
107.16	1591	359	368	350	0.16	0.912743	0.690776	0.623562	0.741512	0.211413	0.196947	0.234201
107.37	1590	360	369	351	0.21	0.912743	0.690171	0.623058	0.741013	0.277723	0.258668	0.307638
107.67	1589	361	370	353	0.3	0.912743	0.689022	0.622216	0.740271	0.397408	0.369896	0.440077
107.88	1588	362	371	354	0.21	0.912743	0.688384	0.62175	0.739615	0.278444	0.259157	0.308285
108.06	1587	363	372	355	0.18	0.912743	0.687596	0.621373	0.739001	0.238939	0.222319	0.264404
108.26	1586	364	373	356	0.2	0.918156	0.686951	0.620943	0.73827	0.267313	0.248732	0.29573
108.42	1585	365	374	357	0.16	0.918156	0.68654	0.620594	0.737976	0.213979	0.199065	0.236717
108.6	1584	366	375	357	0.18	0.918156	0.686043	0.620225	0.73743	0.2409	0.224114	0.266465
108.75	1583	367	376	358	0.15	0.918156	0.68554	0.619917	0.737075	0.200898	0.186851	0.222164
108.86	1582	368	377	359	0.11	0.918156	0.685309	0.619675	0.736692	0.147375	0.137095	0.162984
109.01	1581	369	378	360	0.15	0.918156	0.684841	0.619376	0.736114	0.201103	0.187095	0.222358
109.29	1580	370	379	362	0.28	0.914773	0.683952	0.618786	0.735355	0.374495	0.348317	0.413934
109.53	1579	371	380	363	0.24	0.914773	0.683281	0.618248	0.734503	0.321311	0.298904	0.355109
109.7	1578	372	381	364	0.17	0.914773	0.682613	0.617873	0.733996	0.227818	0.21187	0.251688
109.88	1577	373	382	365	0.18	0.914773	0.681941	0.617352	0.733561	0.241457	0.224466	0.266718
110.03	1576	374	383	366	0.15	0.914773	0.681357	0.616882	0.733239	0.201386	0.187137	0.222435
110.22	1575	375	385	367	0.19	0.912743	0.680845	0.616298	0.732657	0.254715	0.236702	0.281392
110.48	1574	376	386	368	0.26	0.912743	0.679941	0.61571	0.732067	0.34902	0.324169	0.38543
110.63	1573	377	387	369	0.15	0.912743	0.679375	0.615334	0.731612	0.201526	0.187137	0.222499
110.79	1572	378	388	370	0.16	0.912743	0.6788	0.615024	0.731171	0.215143	0.199733	0.237452
110.96	1571	379	389	371	0.17	0.912743	0.678259	0.61461	0.730695	0.228772	0.212354	0.252463
111.18	1570	380	390	372	0.22	0.914773	0.677533	0.614113	0.730104	0.297034	0.275646	0.327709
111.41	1569	381	391	373	0.23	0.914773	0.676641	0.613628	0.72927	0.310944	0.288504	0.342875
111.66	1568	382	392	374	0.25	0.914773	0.675943	0.613057	0.728382	0.338332	0.313974	0.373037
111.78	1567	383	393	375	0.12	0.914773	0.675538	0.612755	0.728159	0.162497	0.150754	0.179146
111.99	1566	384	394	376	0.21	0.914773	0.674782	0.612202	0.727506	0.284688	0.264056	0.313789
112.14	1565	385	395	377	0.15	0.917479	0.67434	0.611815	0.727023	0.204084	0.189295	0.224941
112.43	1564	386	396	378	0.29	0.917479	0.673617	0.61092	0.72632	0.394985	0.366325	0.435522
112.59	1563	387	397	379	0.16	0.917479	0.673176	0.610527	0.726005	0.218066	0.202198	0.240443
112.79	1562	388	398	380	0.2	0.917479	0.67259	0.610104	0.725561	0.27282	0.252902	0.300762
113.04	1561	389	399	381	0.25	0.917479	0.671968	0.609559	0.725092	0.34134	0.316332	0.376288
113.24	1560	390	400	382	0.2	0.914773	0.671511	0.609087	0.724597	0.272452	0.252491	0.300375
113.4	1559	391	401	383	0.16	0.914773	0.671099	0.608722	0.724087	0.218095	0.202136	0.240444
113.54	1558	392	402	384	0.14	0.914773	0.670825	0.608388	0.72378	0.190911	0.176944	0.210504
113.75	1557	393	403	385	0.21	0.914773	0.670269	0.607856	0.723172	0.286605	0.265639	0.316033
113.87	1556	394	404	386	0.12	0.914773	0.669904	0.607508	0.722758	0.163863	0.15188	0.180693
114.08	1555	395	405	386	0.21	0.914773	0.669431	0.606925	0.722099	0.286963	0.266033	0.316517
114.26	1554	396	406	387	0.18	0.928609	0.668986	0.606543	0.721654	0.249855	0.23162	0.275578
114.45	1553	397	407	388	0.19	0.928609	0.668431	0.606192	0.721234	0.263955	0.24463	0.291056
114.59	1552	398	408	389	0.14	0.928609	0.667972	0.605941	0.720895	0.194627	0.180339	0.214551
114.86	1551	399	409	390	0.27	0.928609	0.667018	0.605377	0.720163	0.375888	0.34815	0.414162
115.07	1550	400	410	391	0.21	0.928609	0.666383	0.604832	0.71959	0.292636	0.270999	0.322417
115.32	1549	401	411	393	0.25	0.912093	0.665818	0.604237	0.718889	0.342471	0.317189	0.377374
115.44	1548	402	412	394	0.12	0.912093	0.665481	0.603947	0.71855	0.164469	0.152322	0.181227
115.67	1547	403	413	395	0.23	0.912093	0.664749	0.603407	0.717716	0.31558	0.29229	0.347662
115.88	1546	404	414	396	0.21	0.912093	0.664153	0.602978	0.717171	0.288397	0.267077	0.317656
116.04	1545	405	415	397	0.16	0.912093	0.663463	0.602618	0.71682	0.219959	0.203587	0.242168
116.16	1544	406	416	397	0.12	0.916126	0.662964	0.602371	0.716524	0.165824	0.153428	0.182504
116.3	1543	407	417	398	0.14	0.916126	0.662364	0.601893	0.716152	0.193636	0.179093	0.213091
116.45	1542	408	418	399	0.15	0.916126	0.661834	0.601537	0.715756	0.207634	0.191991	0.228446
116.55	1541	409	419	400	0.1	0.916126	0.661538	0.601296	0.715522	0.138484	0.128036	0.152359
116.72	1540	410	419	400	0.17	0.916126	0.661047	0.600903	0.715145	0.235598	0.217776	0.259179
116.93	1539	411	420	401	0.21	0.916126	0.660432	0.600477	0.714651	0.291304	0.269203	0.320389
117.06	1538	412	421	402	0.13	0.916126	0.660094	0.600194	0.714287	0.180423	0.166735	0.19843
117.27	1537	413	422	403	0.21	0.920186	0.659418	0.599695	0.713907	0.293045	0.270678	0.322229
117.5	1536	414	423	404	0.23	0.920186	0.658772	0.599259	0.713254	0.321268	0.296728	0.353174
117.69	1535	415	425	406	0.19	0.920186	0.658263	0.59889	0.712774	0.265601	0.245289	0.291932
117.84	1534	416	425	407	0.15	0.920186	0.657802	0.59866	0.712332	0.209832	0.193769	0.230561
117.98	1533	417	426	407	0.14	0.920186	0.657371	0.598345	0.711971	0.195972	0.180943	0.215304
118.14	1532	418	427	408	0.16	0.912067	0.656777	0.598001	0.71133	0.222192	0.205152	0.244031
118.32	1531	419	428	409	0.18	0.912067	0.656316	0.597568	0.710633	0.250142	0.231022	0.274734
118.5	1530	420	429	410	0.18	0.912067	0.655902	0.597083	0.709933	0.2503	0.23125	0.274957
118.67	1529	421	430	411	0.17	0.912067	0.655276	0.596565	0.70946	0.23662	0.218548	0.259907
118.86	1528	422	432	413	0.19	0.912067	0.654644	0.596029	0.708956	0.264713	0.244433	0.290745
119.04	1527	423	432	413	0.18	0.912067	0.654088	0.59545	0.708423	0.250994	0.231743	0.275711
119.31	1526	424	434	415	0.27	0.920186	0.653338	0.594862	0.707739	0.380278	0.351048	0.41766
119.46	1525	425	435	416	0.15	0.920186	0.652937	0.594485	0.707305	0.211395	0.195146	0.232181
119.6	1524	426	436	417	0.14	0.920186	0.652524	0.594139	0.706948	0.197427	0.182228	0.216828
119.76	1523	427	437	417	0.16	0.920186	0.652002	0.593777	0.706568	0.225812	0.208373	0.247955
119.94	1522	428	438	418	0.18	0.920186	0.651406	0.593408	0.706105	0.254271	0.234574	0.279122
120.09	1521	429	439	419	0.15	0.916803	0.651005	0.593095	0.70568	0.211243	0.194876	0.231869
120.23	1520	430	440	420	0.14	0.916803	0.650548	0.592788	0.705268	0.197299	0.181991	0.216523
120.38	1519	431	440	421	0.15	0.916803	0.650012	0.592456	0.704755	0.211566	0.195132	0.232119
120.56	1518	432	441	422	0.18	0.916803	0.64924	0.592133	0.704239	0.254181	0.23433	0.278695
120.66	1517	433	442	423	0.1	0.916803	0.648977	0.59194	0.70391	0.141269	0.130244	0.154881
120.86	1516	434	443	424	0.2	0.916803	0.648429	0.591486	0.703058	0.282777	0.260804	0.31
120.99	1515	435	444	425	0.13	0.916803	0.647939	0.591087	0.70265	0.183944	0.169621	0.201636
121.2	1514	436	445	426	0.21	0.914096	0.64717	0.590695	0.702043	0.296615	0.273431	0.324973
121.35	1513	437	446	427	0.15	0.914096	0.646702	0.590395	0.701666	0.212021	0.195413	0.232242
121.61	1512	438	447	428	0.26	0.914096	0.645999	0.589812	0.701029	0.367903	0.339023	0.40295
121.86	1511	439	448	429	0.25	0.914096	0.645177	0.589225	0.700317	0.354204	0.326315	0.387839
122.12	1510	440	450	430	0.26	0.914096	0.644401	0.588623	0.699602	0.368815	0.339715	0.403765
122.3	1509	441	451	431	0.18	0.914773	0.643937	0.588149	0.699082	0.255707	0.235536	0.279962
122.46	1508	442	452	432	0.16	0.914773	0.643299	0.587763	0.698581	0.227521	0.209516	0.249018
122.67	1507	443	453	433	0.21	0.914773	0.642533	0.587122	0.69781	0.298977	0.275293	0.327193
122.79	1506	444	454	434	0.12	0.914773	0.641867	0.586838	0.697388	0.171021	0.157405	0.187058
122.99	1505	445	454	435	0.2	0.914773	0.641261	0.586279	0.6969	0.285304	0.262526	0.312061
123.17	1504	446	455	436	0.18	0.914096	0.640794	0.585775	0.696508	0.256771	0.236232	0.280888
123.32	1503	447	456	437	0.15	0.914096	0.640403	0.585439	0.696252	0.214106	0.196932	0.234208
123.47	1502	448	457	437	0.15	0.914096	0.63995	0.585144	0.695922	0.214258	0.197026	0.234326
123.65	1501	449	458	438	0.18	0.914096	0.639382	0.584801	0.695504	0.257338	0.236573	0.281356
123.83	1500	450	459	439	0.18	0.914096	0.638949	0.584404	0.694849	0.257513	0.236796	0.281547
124.05	1499	451	460	441	0.22	0.914096	0.638472	0.583969	0.694266	0.314973	0.28966	0.34437
124.23	1498	452	461	442	0.18	0.918156	0.638125	0.583582	0.693772	0.25899	0.238217	0.283196
124.44	1497	453	463	443	0.21	0.918156	0.637543	0.583175	0.693056	0.302431	0.278207	0.330626
124.74	1496	454	464	444	0.3	0.918156	0.636602	0.582421	0.692406	0.432683	0.397811	0.472934
124.91	1495	455	465	445	0.17	0.918156	0.635982	0.582043	0.691973	0.245426	0.225568	0.26817
125.1	1494	456	466	446	0.19	0.918301	0.635211	0.58165	0.691486	0.274676	0.252322	0.299969
125.25	1493	457	467	447	0.15	0.918301	0.634644	0.581154	0.69088	0.217043	0.199376	0.23702
125.4	1492	458	468	448	0.15	0.918301	0.63404	0.580645	0.690396	0.21725	0.199516	0.237228
125.58	1491	459	469	449	0.18	0.918301	0.633388	0.580232	0.689895	0.260968	0.239593	0.284876
125.76	1490	460	470	450	0.18	0.918301	0.632883	0.579801	0.689383	0.261177	0.239771	0.285088
125.93	1489	461	471	451	0.17	0.918301	0.632308	0.579447	0.688992	0.246891	0.226579	0.269414
126.11	1488	462	472	452	0.18	0.91937	0.631739	0.579107	0.68857	0.261954	0.240334	0.285761
126.3	1487	463	473	453	0.19	0.91937	0.63123	0.578567	0.68799	0.27673	0.253899	0.301919
126.53	1486	464	474	454	0.23	0.91937	0.630594	0.577988	0.687442	0.335327	0.307597	0.365847
126.77	1485	465	476	455	0.24	0.91937	0.629928	0.577442	0.68697	0.350276	0.321191	0.382114
126.92	1484	466	477	456	0.15	0.91937	0.629523	0.577152	0.686707	0.219064	0.200822	0.238941
127.08	1483	467	478	457	0.16	0.916803	0.629195	0.576848	0.686338	0.233137	0.213726	0.254293
127.17	1482	468	478	458	0.09	0.916803	0.628968	0.576645	0.686093	0.131187	0.120264	0.14309
127.31	1481	469	479	459	0.14	0.916803	0.628595	0.576389	0.68573	0.204189	0.187176	0.222684
127.43	1480	470	480	460	0.12	0.916803	0.628105	0.576181	0.685402	0.175156	0.160514	0.190941
127.68	1479	471	481	461	0.25	0.916803	0.627101	0.575659	0.684633	0.365493	0.334779	0.398153
127.85	1478	472	482	462	0.17	0.916803	0.626592	0.575207	0.683984	0.248737	0.227866	0.270957
128.01	1477	473	483	463	0.16	0.916803	0.626106	0.574772	0.6834	0.234287	0.214645	0.255211
128.19	1476	474	485	464	0.18	0.918833	0.625549	0.574443	0.682758	0.264392	0.242238	0.287913
128.42	1475	475	486	465	0.23	0.918833	0.62491	0.573878	0.681935	0.338179	0.3099	0.368251
128.55	1474	476	487	466	0.13	0.918833	0.624418	0.573565	0.681607	0.191295	0.175245	0.208256
128.67	1473	477	488	467	0.12	0.918833	0.624008	0.57326	0.681299	0.176696	0.161838	0.192338
128.85	1472	478	489	468	0.18	0.918833	0.623484	0.572859	0.680727	0.265267	0.242961	0.28871
129	1471	479	489	469	0.15	0.918833	0.62313	0.572522	0.680296	0.221182	0.202596	0.240733
129.29	1470	480	491	470	0.29	0.9167	0.622292	0.571913	0.679584	0.4272	0.391185	0.464832
129.44	1469	481	492	471	0.15	0.9167	0.621819	0.571632	0.679196	0.221133	0.202453	0.240548
129.63	1468	482	493	472	0.19	0.9167	0.621048	0.571047	0.678722	0.28045	0.256619	0.305006
129.8	1467	483	494	473	0.17	0.9167	0.620412	0.570669	0.678257	0.251186	0.229764	0.273081
129.93	1466	484	495	474	0.13	0.9167	0.620093	0.570349	0.678023	0.192182	0.175762	0.208944
130.08	1465	485	496	475	0.15	0.9167	0.619709	0.569999	0.677693	0.221887	0.202902	0.241237
130.28	1464	486	497	476	0.2	0.9167	0.619215	0.569432	0.677221	0.296085	0.270724	0.32197
130.43	1463	487	498	477	0.15	0.9167	0.618759	0.569138	0.676667	0.222227	0.203209	0.241602
130.55	1462	488	499	478	0.12	0.9167	0.618486	0.56884	0.676312	0.17786	0.162653	0.193383
130.67	1461	489	500	479	0.12	0.9167	0.618179	0.568386	0.676054	0.177948	0.162715	0.193537
130.77	1460	490	500	479	0.1	0.9167	0.617907	0.56806	0.675886	0.148356	0.135629	0.161374
130.94	1459	491	501	480	0.17	0.9167	0.617464	0.567651	0.675429	0.252386	0.230726	0.274533
131.1	1458	492	502	481	0.16	0.9167	0.617059	0.567289	0.67504	0.237695	0.217279	0.258549
131.27	1457	493	503	482	0.17	0.9167	0.616498	0.566867	0.674475	0.252781	0.231052	0.274913
131.46	1456	494	504	483	0.19	0.9167	0.615885	0.566482	0.673999	0.282801	0.258417	0.307464
131.7	1455	495	505	484	0.24	0.9167	0.615193	0.566	0.673365	0.357624	0.326729	0.388707
131.93	1454	496	507	485	0.23	0.9167	0.614312	0.565493	0.672591	0.343215	0.313476	0.372845
132.14	1453	497	508	486	0.21	0.9167	0.61343	0.56502	0.671961	0.313821	0.286485	0.340708
132.41	1452	498	509	488	0.27	0.9167	0.612552	0.564398	0.670993	0.404062	0.36887	0.438536
132.57	1451	499	510	489	0.16	0.9167	0.612032	0.564124	0.670499	0.239648	0.218751	0.26
132.72	1450	500	511	490	0.15	0.9167	0.611423	0.563848	0.669921	0.224894	0.205256	0.243869
132.92	1449	501	512	491	0.2	0.9167	0.610602	0.563386	0.669221	0.300261	0.273961	0.325425
133.1	1448	502	513	492	0.18	0.9167	0.609996	0.563004	0.668834	0.270503	0.246707	0.293081
133.25	1447	503	514	493	0.15	0.9167	0.609518	0.56244	0.668438	0.225596	0.205711	0.244479
133.4	1446	504	515	494	0.15	0.9167	0.609075	0.561974	0.668126	0.22576	0.205807	0.244682
133.56	1445	505	516	495	0.16	0.9167	0.608512	0.561592	0.667699	0.241034	0.219668	0.261172
133.71	1444	506	517	496	0.15	0.9167	0.607975	0.561285	0.667371	0.226169	0.20604	0.244983
133.88	1443	507	518	497	0.17	0.9167	0.607565	0.560924	0.666967	0.256498	0.233653	0.277826
133.98	1442	508	519	498	0.1	0.9167	0.60734	0.56071	0.666718	0.150937	0.137494	0.163489
134.13	1441	509	520	499	0.15	0.9167	0.606959	0.560327	0.666366	0.226548	0.20635	0.245401
134.27	1440	510	521	500	0.14	0.9167	0.606468	0.559932	0.666058	0.211616	0.192683	0.229203
134.52	1439	511	522	501	0.25	0.9167	0.605584	0.559243	0.665257	0.378436	0.344491	0.409795
134.66	1438	512	523	502	0.14	0.9167	0.60526	0.558956	0.66486	0.212038	0.19303	0.229603
134.76	1437	513	524	502	0.1	0.9167	0.604944	0.558784	0.664605	0.151535	0.137932	0.164053
134.94	1436	514	525	503	0.18	0.9167	0.60434	0.558434	0.66414	0.273035	0.248451	0.29548
135.08	1435	515	526	504	0.14	0.9167	0.6039	0.558204	0.663755	0.212515	0.193351	0.229912
135.3	1434	516	527	505	0.22	0.9167	0.603177	0.557637	0.662797	0.334353	0.304277	0.361658
135.44	1433	517	528	506	0.14	0.9167	0.602788	0.557322	0.662302	0.212907	0.193776	0.230276
135.57	1432	518	529	507	0.13	0.9167	0.602365	0.557067	0.661913	0.197839	0.18004	0.213926
135.8	1431	519	530	508	0.23	0.9167	0.601787	0.556593	0.661271	0.350358	0.318842	0.378806
135.99	1430	520	531	509	0.19	0.9167	0.601305	0.556215	0.660792	0.289658	0.263582	0.31314
136.16	1429	521	532	510	0.17	0.9167	0.600597	0.555858	0.660451	0.259474	0.235959	0.280358
136.44	1428	522	533	512	0.28	0.9167	0.599726	0.5552	0.659458	0.427989	0.389223	0.462313
136.59	1427	523	534	513	0.15	0.9167	0.59923	0.554842	0.659007	0.229469	0.208655	0.247827
136.79	1426	524	535	514	0.2	0.9167	0.59852	0.554409	0.658425	0.306322	0.278452	0.330694
137.04	1425	525	536	515	0.25	0.9167	0.597738	0.553834	0.657818	0.383404	0.348387	0.413797
137.24	1424	526	538	516	0.2	0.9167	0.597004	0.5534	0.657404	0.3071	0.278885	0.331297
137.36	1423	527	539	517	0.12	0.9167	0.596384	0.553106	0.657107	0.184452	0.167406	0.198884
137.52	1422	528	540	518	0.16	0.9167	0.595789	0.552761	0.656743	0.246181	0.223332	0.265344
137.64	1421	529	541	519	0.12	0.9167	0.595424	0.552495	0.656497	0.184749	0.167562	0.199104
137.81	1420	530	542	520	0.17	0.9167	0.594877	0.552191	0.656132	0.261968	0.237512	0.282219
137.93	1419	531	543	521	0.12	0.9167	0.594525	0.551959	0.65575	0.185028	0.167753	0.199298
138.08	1418	532	544	522	0.15	0.9167	0.594104	0.551594	0.655232	0.231449	0.209857	0.249286
138.23	1417	533	545	523	0.15	0.9167	0.593699	0.551253	0.654724	0.231607	0.21002	0.249441
138.35	1416	534	546	524	0.12	0.9167	0.593405	0.550987	0.654454	0.185377	0.168085	0.199649
138.53	1415	535	546	525	0.18	0.9167	0.592893	0.550698	0.653988	0.278307	0.252307	0.299631
138.74	1414	536	547	526	0.21	0.9167	0.592203	0.550232	0.653367	0.325069	0.294638	0.349865
138.89	1413	537	548	527	0.15	0.9167	0.591844	0.549958	0.652917	0.232333	0.210601	0.250028
139.05	1412	538	549	528	0.16	0.9167	0.591312	0.549701	0.652431	0.248045	0.224808	0.266822
139.19	1411	539	550	529	0.14	0.9167	0.590994	0.549411	0.652063	0.217156	0.196819	0.233592
139.47	1410	540	552	530	0.28	0.9167	0.590269	0.548731	0.651308	0.434846	0.394093	0.467763
139.71	1409	541	553	531	0.24	0.9167	0.589573	0.54808	0.650736	0.373165	0.338091	0.401416
139.89	1408	542	554	532	0.18	0.9167	0.588773	0.547703	0.65031	0.280254	0.253735	0.301269
140.07	1407	543	555	533	0.18	0.9167	0.587943	0.547282	0.649543	0.28065	0.254034	0.301501
140.22	1406	544	556	534	0.15	0.9167	0.587385	0.546881	0.649183	0.234097	0.211812	0.251435
140.37	1405	545	557	535	0.15	0.9167	0.586981	0.54656	0.648725	0.234258	0.211962	0.251583
140.48	1404	546	558	535	0.11	0.9167	0.58638	0.546305	0.64839	0.171965	0.155519	0.18458
140.73	1403	547	559	536	0.25	0.9167	0.585456	0.545721	0.647513	0.391447	0.353931	0.419949
140.91	1402	548	560	537	0.18	0.9167	0.584818	0.545254	0.64711	0.282149	0.254989	0.302622
141.09	1401	549	561	538	0.18	0.9167	0.584086	0.54491	0.646414	0.282503	0.255264	0.302814
141.26	1400	550	562	539	0.17	0.9167	0.583618	0.544556	0.645678	0.267022	0.241357	0.286176
141.41	1399	551	563	540	0.15	0.9167	0.583282	0.544242	0.645163	0.235744	0.213132	0.252654
141.51	1398	552	564	541	0.1	0.9167	0.583086	0.543974	0.644877	0.157215	0.142151	0.168519
141.66	1397	553	565	542	0.15	0.9167	0.582695	0.543611	0.644468	0.235981	0.213362	0.252947
141.8	1396	554	566	543	0.14	0.9167	0.582275	0.543335	0.644053	0.220408	0.199266	0.236204
141.92	1395	555	566	544	0.12	0.9167	0.581875	0.543145	0.643744	0.189051	0.170882	0.202532
142.04	1394	556	567	545	0.12	0.9167	0.581511	0.542903	0.643435	0.189169	0.170964	0.202622
142.23	1393	557	568	546	0.19	0.9167	0.58099	0.542496	0.642968	0.299786	0.270889	0.321059
142.44	1392	558	569	547	0.21	0.9167	0.580417	0.542001	0.642487	0.33167	0.299628	0.355178
142.64	1391	559	570	548	0.2	0.9167	0.579884	0.541437	0.641872	0.316167	0.285633	0.338617
142.73	1390	560	571	549	0.09	0.9167	0.579625	0.541156	0.64161	0.142339	0.128588	0.152457
142.94	1389	561	572	550	0.21	0.9167	0.578968	0.540653	0.641093	0.3325	0.30028	0.356064
143.1	1388	562	573	551	0.16	0.9167	0.578481	0.540376	0.640655	0.253547	0.228941	0.271426
143.28	1387	563	574	552	0.18	0.9167	0.577889	0.539994	0.640294	0.285533	0.257704	0.30557
143.46	1386	564	575	553	0.18	0.9167	0.577356	0.539624	0.63985	0.285796	0.257882	0.305779
143.61	1385	565	576	554	0.15	0.9167	0.576891	0.539282	0.639418	0.238355	0.215047	0.254978
143.79	1384	566	577	555	0.18	0.9167	0.576374	0.538814	0.63898	0.286283	0.258233	0.306239
143.91	1383	567	578	556	0.12	0.9167	0.575986	0.538544	0.638434	0.190984	0.172303	0.204262
144.06	1382	568	579	556	0.15	0.9167	0.575507	0.538251	0.637761	0.238929	0.215606	0.255466
144.18	1381	569	580	557	0.12	0.9167	0.57519	0.538027	0.637297	0.191248	0.17261	0.204458
144.47	1380	570	581	558	0.29	0.9167	0.574377	0.537401	0.63652	0.462837	0.417651	0.494682
144.6	1379	571	582	560	0.13	0.9167	0.573951	0.537076	0.636182	0.207633	0.187322	0.221889
144.78	1378	572	583	561	0.18	0.9167	0.573405	0.536702	0.635703	0.287765	0.259565	0.307444
144.96	1377	573	584	562	0.18	0.9167	0.572964	0.536248	0.635128	0.287987	0.259799	0.307705
145.2	1376	574	585	563	0.24	0.9167	0.572103	0.535796	0.634315	0.38456	0.346843	0.410619
145.34	1375	575	587	564	0.14	0.9167	0.571659	0.535516	0.633776	0.224501	0.202497	0.239653
145.46	1374	576	587	564	0.12	0.9167	0.571352	0.53528	0.633421	0.192533	0.173667	0.205507
145.76	1373	577	588	565	0.3	0.9167	0.570594	0.534701	0.63278	0.481971	0.434606	0.514325
146	1372	578	589	567	0.24	0.9167	0.569769	0.534246	0.632288	0.386135	0.347955	0.41181
146.19	1371	579	591	568	0.19	0.9167	0.569132	0.533816	0.631646	0.306033	0.275745	0.326279
146.34	1370	580	592	569	0.15	0.9167	0.568565	0.533449	0.63121	0.241846	0.217844	0.257766
146.52	1369	581	593	570	0.18	0.9167	0.568076	0.532971	0.630788	0.290464	0.261587	0.309597
146.67	1368	582	594	571	0.15	0.9167	0.567559	0.532623	0.630409	0.242275	0.21812	0.258166
146.82	1367	583	595	572	0.15	0.9167	0.567005	0.532256	0.630043	0.242511	0.218247	0.258344
146.96	1366	584	596	573	0.14	0.9167	0.566583	0.531907	0.629719	0.226512	0.203802	0.241279
147.08	1365	585	597	574	0.12	0.9167	0.566202	0.53165	0.629386	0.194284	0.17478	0.206911
147.26	1364	586	598	575	0.18	0.9167	0.565641	0.531267	0.628917	0.291715	0.262365	0.31059
147.44	1363	587	599	576	0.18	0.9167	0.565034	0.530889	0.62836	0.292028	0.262598	0.31081
147.56	1362	588	600	577	0.12	0.9167	0.564597	0.530619	0.628033	0.194836	0.175156	0.207313
147.75	1361	589	601	578	0.19	0.9167	0.564134	0.530034	0.627466	0.308744	0.277582	0.328607
147.87	1360	590	602	579	0.12	0.9167	0.563787	0.529691	0.627141	0.195116	0.175405	0.207676
147.98	1359	591	602	579	0.11	0.9167	0.563506	0.529371	0.626814	0.178946	0.160872	0.190484
148.14	1358	592	603	580	0.16	0.9167	0.562921	0.529114	0.626386	0.260555	0.234156	0.277203
148.31	1357	593	604	581	0.17	0.9167	0.562399	0.528707	0.625934	0.277097	0.24897	0.294755
148.44	1356	594	605	582	0.13	0.9167	0.562047	0.528368	0.625503	0.21203	0.19052	0.225545
148.74	1355	595	606	583	0.3	0.9167	0.561315	0.527555	0.624722	0.489939	0.440211	0.521292
148.98	1354	596	608	585	0.24	0.9167	0.560516	0.527006	0.62417	0.392509	0.352481	0.417468
149.19	1353	597	609	586	0.21	0.9167	0.559844	0.526596	0.623601	0.343858	0.308702	0.365569
149.31	1352	598	610	587	0.12	0.9167	0.559404	0.526301	0.623265	0.196645	0.176496	0.209014
149.46	1351	599	611	588	0.15	0.9167	0.559045	0.526009	0.622839	0.245964	0.220771	0.261412
149.61	1350	600	612	588	0.15	0.9167	0.558656	0.525629	0.622457	0.246135	0.220907	0.261601
149.78	1349	601	613	589	0.17	0.9167	0.558202	0.525331	0.622142	0.279181	0.250488	0.296649
150	1348	602	614	590	0.22	0.9167	0.557585	0.524822	0.621543	0.361692	0.324473	0.384271
150.18	1347	603	615	591	0.18	0.9167	0.557065	0.524418	0.621169	0.296206	0.265638	0.314646
150.41	1346	604	616	593	0.23	0.9167	0.556365	0.523914	0.620673	0.378962	0.339697	0.402434
150.56	1345	605	617	594	0.15	0.9167	0.5558	0.523568	0.620221	0.2474	0.221703	0.262631
150.68	1344	606	618	594	0.12	0.9167	0.555423	0.523279	0.619868	0.198054	0.177464	0.21022
150.78	1343	607	619	595	0.1	0.9167	0.555146	0.523044	0.619563	0.165128	0.147959	0.175262
150.9	1342	608	620	596	0.12	0.9167	0.554843	0.522786	0.61914	0.198262	0.177672	0.210419
151.1	1341	609	621	597	0.2	0.9167	0.554284	0.52243	0.618466	0.330769	0.296443	0.350937
151.28	1340	610	622	598	0.18	0.9167	0.553763	0.522029	0.618021	0.297972	0.266991	0.316086
151.41	1339	611	623	599	0.13	0.9167	0.55327	0.521699	0.617627	0.215394	0.19295	0.228429
151.55	1338	612	623	600	0.14	0.9167	0.552789	0.521451	0.61714	0.232165	0.207956	0.246117
151.7	1337	613	624	601	0.15	0.9167	0.552332	0.521058	0.616685	0.248953	0.222974	0.263896
151.82	1336	614	625	602	0.12	0.9167	0.552002	0.520731	0.616412	0.199282	0.178459	0.211249
151.98	1335	615	626	603	0.16	0.9167	0.551594	0.520376	0.615862	0.265906	0.238157	0.281858
152.12	1334	616	627	604	0.14	0.9167	0.551239	0.519926	0.615483	0.232817	0.208516	0.246839
152.31	1333	617	628	605	0.19	0.9167	0.550726	0.519649	0.614867	0.316261	0.283269	0.335174
152.46	1332	618	629	606	0.15	0.9167	0.550355	0.519251	0.614425	0.249848	0.223795	0.264814
152.64	1331	619	631	607	0.18	0.9167	0.549535	0.518843	0.614013	0.300265	0.268734	0.318027
152.79	1330	620	631	608	0.15	0.9167	0.549167	0.518523	0.613636	0.250388	0.224082	0.265186
152.96	1329	621	632	609	0.17	0.9167	0.548573	0.518084	0.613124	0.284081	0.254172	0.300799
153.11	1328	622	633	610	0.15	0.9167	0.548017	0.517668	0.612623	0.250914	0.224453	0.265624
153.26	1327	623	634	611	0.15	0.9167	0.547446	0.51739	0.612238	0.251176	0.224594	0.265767
153.45	1326	624	635	612	0.19	0.9167	0.54683	0.517021	0.61187	0.318514	0.284657	0.336878
153.59	1325	625	636	613	0.14	0.9167	0.546335	0.516643	0.611529	0.234907	0.209864	0.248408
153.74	1324	626	637	614	0.15	0.9167	0.545805	0.51632	0.611108	0.251931	0.225009	0.266318
153.87	1323	627	638	615	0.13	0.9167	0.545464	0.51609	0.610699	0.218476	0.195139	0.230911
153.99	1322	628	639	616	0.12	0.9167	0.545106	0.515859	0.610363	0.201803	0.180227	0.213244
154.17	1321	629	640	617	0.18	0.9167	0.544559	0.515541	0.609729	0.303009	0.270622	0.320064
154.32	1320	630	641	618	0.15	0.9167	0.544022	0.515258	0.609125	0.252756	0.225742	0.266866
154.49	1319	631	642	619	0.17	0.9167	0.543338	0.514847	0.608566	0.286818	0.256076	0.30269
154.61	1318	632	643	620	0.12	0.9167	0.542839	0.514559	0.608313	0.202646	0.180834	0.213783
154.7	1317	633	644	620	0.09	0.9167	0.542383	0.514344	0.608118	0.152112	0.135669	0.160404
154.88	1316	634	645	621	0.18	0.9167	0.541917	0.514031	0.60763	0.304486	0.271557	0.321004
155	1315	635	646	622	0.12	0.9167	0.541594	0.513816	0.607311	0.203112	0.181133	0.214092
155.1	1314	636	647	623	0.1	0.9167	0.541237	0.513608	0.607057	0.169371	0.151007	0.178483
155.24	1313	637	648	624	0.14	0.9167	0.540688	0.513349	0.606657	0.237361	0.21155	0.250002
155.42	1312	638	649	625	0.18	0.9167	0.540059	0.513026	0.606033	0.305533	0.272272	0.321633
155.58	1311	639	650	626	0.16	0.9167	0.539423	0.512637	0.605577	0.271906	0.242202	0.286113
155.78	1310	640	651	627	0.2	0.9167	0.538819	0.512288	0.605092	0.340263	0.302995	0.357885
155.99	1309	641	652	628	0.21	0.9167	0.538213	0.511811	0.604538	0.357678	0.318437	0.376129
156.12	1308	642	654	629	0.13	0.9167	0.537819	0.511312	0.604241	0.221582	0.197224	0.233069
156.27	1307	643	654	630	0.15	0.9167	0.537377	0.51091	0.603749	0.255882	0.227752	0.269137
156.47	1306	644	656	631	0.2	0.9167	0.53673	0.510605	0.603159	0.341587	0.303966	0.359064
156.66	1305	645	657	632	0.19	0.9167	0.536223	0.510086	0.602654	0.324815	0.28901	0.341458
156.78	1304	646	658	633	0.12	0.9167	0.535813	0.509831	0.602262	0.205303	0.182652	0.215766
156.98	1303	647	659	634	0.2	0.9167	0.535141	0.509467	0.6018	0.342601	0.304653	0.359867
157.13	1302	648	660	635	0.15	0.9167	0.534722	0.509184	0.601438	0.257152	0.228627	0.270049
157.31	1301	649	661	636	0.18	0.9167	0.534144	0.50884	0.600998	0.308917	0.274554	0.324279
157.5	1300	650	662	637	0.19	0.9167	0.533485	0.508463	0.600565	0.326482	0.290015	0.342548
157.61	1299	651	663	638	0.11	0.9167	0.533155	0.508193	0.600263	0.189132	0.167988	0.198423
157.76	1298	652	664	639	0.15	0.9167	0.532778	0.507886	0.599874	0.25809	0.229223	0.27074
157.89	1297	653	665	640	0.13	0.9167	0.532423	0.507662	0.599636	0.223828	0.198739	0.234745
158.09	1296	654	666	641	0.2	0.9167	0.531796	0.507325	0.599018	0.344756	0.306068	0.361386
158.27	1295	655	667	642	0.18	0.9167	0.53132	0.506969	0.598418	0.310559	0.275737	0.325476
158.39	1294	656	668	643	0.12	0.9167	0.531036	0.506784	0.597965	0.20715	0.183964	0.217063
158.49	1293	657	669	644	0.1	0.9167	0.5307	0.506598	0.59769	0.172734	0.153374	0.180952
158.63	1292	658	670	645	0.14	0.9167	0.530164	0.506273	0.597264	0.242072	0.214876	0.253495
158.79	1291	659	671	646	0.16	0.9167	0.529683	0.505939	0.596745	0.276905	0.245787	0.289901
158.97	1290	660	672	647	0.18	0.9167	0.529182	0.505664	0.596165	0.311813	0.276779	0.326316
159.11	1289	661	673	648	0.14	0.9167	0.528897	0.505437	0.595826	0.242652	0.215395	0.253915
159.35	1288	662	674	649	0.24	0.9167	0.528213	0.504993	0.595163	0.416514	0.36966	0.435665
159.57	1287	663	676	651	0.22	0.9167	0.52773	0.504455	0.594501	0.382154	0.339232	0.399786
159.74	1286	664	677	652	0.17	0.9167	0.527196	0.504068	0.593782	0.2956	0.262452	0.309163
159.84	1285	665	678	653	0.1	0.9167	0.526892	0.503882	0.59346	0.173983	0.154467	0.181927
159.99	1284	666	679	654	0.15	0.9167	0.526504	0.503642	0.59278	0.261166	0.231967	0.273021
160.14	1283	667	680	655	0.15	0.9167	0.525966	0.50326	0.5925	0.261433	0.232076	0.273229
160.28	1282	668	681	656	0.14	0.9167	0.525592	0.502817	0.592238	0.244178	0.2167	0.255238
160.44	1281	669	682	657	0.16	0.9167	0.525231	0.502437	0.591549	0.279252	0.247946	0.291921
160.64	1280	670	683	658	0.2	0.9167	0.524736	0.502101	0.590939	0.349395	0.310252	0.365146
160.8	1279	671	684	659	0.16	0.9167	0.524362	0.501562	0.590299	0.279715	0.248471	0.292431
160.94	1278	672	685	660	0.14	0.9167	0.523908	0.501221	0.589854	0.244963	0.217576	0.256051
161.06	1277	673	686	661	0.12	0.9167	0.523547	0.500968	0.589531	0.210113	0.186596	0.219583
161.22	1276	674	687	662	0.16	0.9167	0.523137	0.500761	0.589097	0.28037	0.248978	0.292898
161.34	1275	675	688	663	0.12	0.9167	0.522879	0.500566	0.588761	0.210381	0.18684	0.219759
161.54	1274	676	689	664	0.2	0.9167	0.522473	0.500216	0.588247	0.350908	0.311672	0.366522
161.7	1273	677	690	665	0.16	0.9167	0.522095	0.499955	0.587686	0.28093	0.249576	0.293371
161.82	1272	678	691	665	0.12	0.9167	0.521858	0.499753	0.587423	0.210793	0.187265	0.220117
162.02	1271	679	692	666	0.2	0.9167	0.521377	0.499316	0.586916	0.351645	0.312379	0.367182
162.15	1270	680	693	667	0.13	0.9167	0.521036	0.49906	0.58653	0.228719	0.20318	0.238791
162.27	1269	681	693	668	0.12	0.9167	0.520691	0.498794	0.586113	0.211265	0.187684	0.22054
162.41	1268	682	694	669	0.14	0.9167	0.520306	0.498481	0.585755	0.246659	0.219098	0.257458
162.54	1267	683	695	670	0.13	0.9167	0.519793	0.498234	0.585395	0.229266	0.203574	0.239187
162.66	1266	684	696	671	0.12	0.9167	0.519365	0.498045	0.585037	0.211805	0.188029	0.220872
162.81	1265	685	697	672	0.15	0.9167	0.518877	0.497733	0.584563	0.265005	0.235227	0.276262
162.95	1264	686	698	672	0.14	0.9167	0.518548	0.497262	0.58412	0.247495	0.219712	0.25809
163.04	1263	687	699	673	0.09	0.9167	0.51839	0.497082	0.583855	0.159153	0.141307	0.165975
163.23	1262	688	700	674	0.19	0.9167	0.517999	0.496636	0.583389	0.336242	0.298554	0.350706
163.4	1261	689	701	675	0.17	0.9167	0.517677	0.496128	0.582975	0.301035	0.267317	0.314111
163.62	1260	690	702	676	0.22	0.9167	0.517234	0.495639	0.58235	0.389908	0.346311	0.406897
163.77	1259	691	703	677	0.15	0.9167	0.516924	0.495386	0.581932	0.266006	0.23629	0.277571
163.94	1258	692	704	679	0.17	0.9167	0.516493	0.494918	0.581515	0.301725	0.267988	0.314878
164.12	1257	693	705	680	0.18	0.9167	0.51603	0.494606	0.58088	0.31976	0.284062	0.333611
164.3	1256	694	706	681	0.18	0.9167	0.515616	0.494254	0.580376	0.320017	0.284309	0.333849
164.43	1255	695	707	682	0.13	0.9167	0.515339	0.493915	0.579919	0.231248	0.205496	0.241278
164.58	1254	696	708	682	0.15	0.9167	0.515035	0.493529	0.579614	0.266982	0.237235	0.278616
164.73	1253	697	709	683	0.15	0.9167	0.514759	0.493183	0.579332	0.267125	0.237351	0.278811
164.88	1252	698	710	685	0.15	0.9167	0.514402	0.492973	0.578767	0.26731	0.237583	0.27893
165.14	1251	699	711	686	0.26	0.9167	0.513772	0.492444	0.578214	0.463906	0.412204	0.483998
165.31	1250	700	712	687	0.17	0.9167	0.513379	0.49213	0.577717	0.303555	0.26975	0.316662
165.57	1249	701	714	688	0.26	0.9167	0.512813	0.491531	0.576913	0.464774	0.413134	0.484898
165.67	1248	702	715	689	0.1	0.9167	0.51254	0.491263	0.576723	0.178854	0.15895	0.186601
165.76	1247	703	716	690	0.09	0.9167	0.512313	0.491044	0.576564	0.16104	0.143094	0.168016
166.01	1246	704	717	691	0.25	0.9167	0.511732	0.490638	0.575883	0.447842	0.397954	0.467096
166.16	1245	705	718	692	0.15	0.9167	0.51146	0.490275	0.5755	0.268848	0.238931	0.280465
166.35	1244	706	719	693	0.19	0.9167	0.510998	0.489918	0.575101	0.340848	0.302856	0.355515
166.59	1243	707	720	694	0.24	0.9167	0.510346	0.489423	0.574593	0.431096	0.382893	0.449525
166.72	1242	708	721	695	0.13	0.9167	0.510113	0.489228	0.574385	0.233617	0.207476	0.24359
166.88	1241	709	722	696	0.16	0.9167	0.509876	0.488737	0.574019	0.287662	0.255518	0.300104
167.01	1240	710	723	697	0.13	0.9167	0.509571	0.488406	0.573632	0.233865	0.207748	0.244
167.19	1239	711	724	698	0.18	0.9167	0.508987	0.488091	0.573155	0.324185	0.287891	0.338064
167.29	1238	712	725	698	0.1	0.9167	0.508728	0.487891	0.572906	0.180195	0.160009	0.18789
167.51	1237	713	726	699	0.22	0.9167	0.508343	0.487474	0.572504	0.396728	0.352266	0.413712
167.6	1236	714	727	700	0.09	0.9167	0.508209	0.48731	0.572313	0.162341	0.144157	0.169303
167.75	1235	715	728	701	0.15	0.9167	0.507904	0.486997	0.571987	0.27073	0.240399	0.282353
167.91	1234	716	729	702	0.16	0.9167	0.507636	0.486641	0.571691	0.288931	0.256558	0.301397
168.1	1233	717	730	703	0.19	0.9167	0.507331	0.486165	0.571205	0.343312	0.304922	0.358259
168.22	1232	718	731	704	0.12	0.9167	0.507083	0.485919	0.570941	0.216935	0.192672	0.226383
168.38	1231	719	732	705	0.16	0.9167	0.506681	0.485649	0.570634	0.289476	0.257033	0.302012
168.54	1230	720	733	706	0.16	0.9167	0.506339	0.485339	0.570304	0.289672	0.257182	0.302205
168.72	1229	721	734	707	0.18	0.9167	0.505906	0.485018	0.569567	0.326159	0.289704	0.340206
168.88	1228	722	735	708	0.16	0.9167	0.505561	0.484587	0.569009	0.290117	0.257767	0.302674
169.03	1227	723	736	709	0.15	0.9167	0.505282	0.484348	0.568699	0.272135	0.241789	0.283897
169.12	1226	724	737	710	0.09	0.9167	0.505094	0.484167	0.568543	0.163342	0.145113	0.170402
169.29	1225	725	738	711	0.17	0.9167	0.504555	0.48379	0.568027	0.308864	0.274352	0.322121
169.44	1224	726	739	712	0.15	0.9167	0.504174	0.4835	0.567647	0.272733	0.242237	0.284395
169.62	1223	727	740	713	0.18	0.9167	0.503715	0.483171	0.567281	0.327578	0.290872	0.341507
169.72	1222	728	741	714	0.1	0.9167	0.503513	0.483033	0.567071	0.182061	0.161655	0.18978
169.94	1221	729	742	715	0.22	0.9167	0.503045	0.482722	0.566619	0.400907	0.355926	0.417785
170.13	1220	730	743	716	0.19	0.9167	0.502658	0.482382	0.566206	0.346504	0.307614	0.361069
170.28	1219	731	744	717	0.15	0.9167	0.502372	0.482041	0.565846	0.273711	0.243008	0.285256
170.51	1218	732	745	718	0.23	0.9167	0.501781	0.481588	0.565308	0.420186	0.372967	0.437804
170.6	1217	733	746	719	0.09	0.9167	0.501583	0.481442	0.56513	0.164485	0.14599	0.171366
170.72	1216	734	747	720	0.12	0.9167	0.501337	0.48117	0.564908	0.219421	0.194729	0.228618
170.98	1215	735	748	721	0.26	0.9167	0.500648	0.480725	0.564446	0.476067	0.422258	0.495797
171.1	1214	736	749	722	0.12	0.9167	0.500351	0.480529	0.564168	0.219853	0.194985	0.228923
171.22	1213	737	750	723	0.12	0.9167	0.500115	0.4803	0.563983	0.219957	0.195048	0.229032
171.42	1212	738	751	724	0.2	0.9167	0.499676	0.47997	0.563458	0.366918	0.325384	0.381982
171.64	1211	739	752	724	0.22	0.9167	0.499287	0.479323	0.562989	0.403924	0.35822	0.420748
171.79	1210	740	753	725	0.15	0.9167	0.498985	0.479003	0.562743	0.27557	0.244348	0.287065
171.88	1209	741	754	726	0.09	0.9167	0.498755	0.478817	0.562615	0.165418	0.146642	0.172306
172.04	1208	742	755	727	0.16	0.9167	0.498339	0.478473	0.562306	0.294322	0.26084	0.306542
172.23	1207	743	756	728	0.19	0.9167	0.497883	0.478078	0.561883	0.349827	0.309981	0.364319
172.38	1206	744	757	729	0.15	0.9167	0.497604	0.477813	0.561449	0.276334	0.244911	0.28778
172.5	1205	745	758	730	0.12	0.9167	0.497356	0.477649	0.561131	0.221177	0.19604	0.230303
172.64	1204	746	759	731	0.14	0.9167	0.496981	0.477467	0.560785	0.258235	0.228854	0.268789
172.76	1203	747	760	732	0.12	0.9167	0.496719	0.477257	0.560541	0.221461	0.196246	0.230492
172.85	1202	748	761	732	0.09	0.9167	0.496558	0.477125	0.560403	0.16615	0.147221	0.172917
173	1201	749	762	733	0.15	0.9167	0.496287	0.476844	0.560016	0.277068	0.245538	0.288365
173.19	1200	750	763	734	0.19	0.9167	0.495937	0.476472	0.55933	0.3512	0.311396	0.365547
173.35	1199	751	764	735	0.16	0.9167	0.495437	0.47616	0.558865	0.296046	0.262446	0.308031
173.5	1198	752	766	736	0.15	0.9167	0.495079	0.475932	0.558619	0.277744	0.246152	0.288917
173.6	1197	753	767	737	0.1	0.9167	0.49487	0.475775	0.558359	0.185241	0.164178	0.192675
173.73	1196	754	768	738	0.13	0.9167	0.494589	0.475537	0.557849	0.240949	0.213626	0.250603
173.87	1195	755	769	739	0.14	0.9167	0.49433	0.475226	0.55746	0.25962	0.230219	0.270057
173.97	1194	756	770	740	0.1	0.9167	0.494143	0.475003	0.557194	0.185513	0.164521	0.192988
174.1	1193	757	771	741	0.13	0.9167	0.493885	0.474752	0.556982	0.241293	0.213958	0.251017
174.29	1192	758	772	742	0.19	0.9167	0.49344	0.474321	0.556703	0.352977	0.312865	0.367205
174.38	1191	759	773	743	0.09	0.9167	0.493249	0.474163	0.556531	0.167264	0.148245	0.173997
174.51	1190	760	774	743	0.13	0.9167	0.49301	0.473917	0.556281	0.241721	0.214228	0.25146
174.64	1189	761	775	744	0.13	0.9167	0.492782	0.473669	0.556063	0.241833	0.214312	0.251591
174.94	1188	762	776	745	0.3	0.9167	0.492268	0.473218	0.555463	0.558659	0.4951	0.581149
175.17	1187	763	777	747	0.23	0.9167	0.491811	0.472812	0.554915	0.428703	0.379952	0.44593
175.29	1186	764	778	748	0.12	0.9167	0.491618	0.472616	0.554638	0.223759	0.198335	0.232756
175.39	1185	765	779	748	0.1	0.9167	0.49145	0.472428	0.554389	0.18653	0.165353	0.19404
175.6	1184	766	780	749	0.21	0.9167	0.491068	0.47205	0.553904	0.392017	0.347546	0.407811
175.76	1183	767	782	750	0.16	0.9167	0.490776	0.471743	0.553637	0.298857	0.264925	0.310915
175.88	1182	768	783	751	0.12	0.9167	0.490528	0.471509	0.553332	0.224256	0.198803	0.233302
176.01	1181	769	784	752	0.13	0.9167	0.490251	0.471163	0.552846	0.243082	0.215559	0.25293
176.13	1180	770	785	753	0.12	0.9167	0.490031	0.470803	0.55254	0.224484	0.199088	0.233652
176.25	1179	771	786	754	0.12	0.9167	0.489844	0.470626	0.55222	0.224569	0.199203	0.23374
176.39	1178	772	787	755	0.14	0.9167	0.489545	0.470335	0.551766	0.262158	0.232595	0.272865
176.53	1177	773	788	756	0.14	0.9167	0.489231	0.470043	0.551308	0.262326	0.232788	0.273034
176.7	1176	774	789	757	0.17	0.9167	0.488931	0.46971	0.550858	0.318734	0.282902	0.331777
176.82	1175	775	790	758	0.12	0.9167	0.488664	0.469476	0.550597	0.225112	0.19979	0.234312
176.94	1174	776	791	759	0.12	0.9167	0.488434	0.469292	0.550385	0.225218	0.199868	0.234404
177.04	1173	777	792	760	0.1	0.9167	0.488218	0.469055	0.550095	0.187765	0.166644	0.195435
177.14	1172	778	793	761	0.1	0.9167	0.488015	0.468799	0.549777	0.187842	0.16674	0.195542
177.29	1171	779	794	762	0.15	0.9167	0.487691	0.468485	0.549487	0.281951	0.250242	0.29351
177.38	1170	780	795	763	0.09	0.9167	0.48753	0.46826	0.549291	0.169226	0.150199	0.176191
177.54	1169	781	796	764	0.16	0.9167	0.487244	0.468013	0.548935	0.301024	0.267194	0.313393
177.72	1168	782	797	765	0.18	0.9167	0.486933	0.467652	0.548361	0.338868	0.300908	0.352839
177.82	1167	783	798	766	0.1	0.9167	0.486747	0.467533	0.548121	0.188332	0.167244	0.196072
177.91	1166	784	799	767	0.09	0.9167	0.486585	0.467361	0.547917	0.169555	0.150576	0.176529
178	1165	785	800	767	0.09	0.9167	0.486433	0.467173	0.547745	0.169608	0.150623	0.176601
178.13	1164	786	801	768	0.13	0.9167	0.486042	0.466991	0.547437	0.245187	0.217689	0.255189
178.25	1163	787	802	769	0.12	0.9167	0.485697	0.466815	0.547159	0.226487	0.201046	0.235648
178.44	1162	788	803	770	0.19	0.9167	0.485271	0.46639	0.546841	0.358919	0.318508	0.373449
178.6	1161	789	804	771	0.16	0.9167	0.484921	0.465997	0.546478	0.302466	0.268395	0.314749
178.76	1160	790	805	772	0.16	0.9167	0.484621	0.465654	0.546075	0.302653	0.268593	0.314981
178.88	1159	791	806	773	0.12	0.9167	0.484425	0.465366	0.545722	0.227082	0.201575	0.236381
178.98	1158	792	807	774	0.1	0.9167	0.484288	0.465125	0.545411	0.189288	0.168075	0.197087
179.16	1157	793	808	775	0.18	0.9167	0.484009	0.464832	0.545062	0.340915	0.302729	0.35498
179.39	1156	794	809	776	0.23	0.9167	0.483638	0.464364	0.544558	0.435948	0.387179	0.454043
179.62	1155	795	811	778	0.23	0.9167	0.483217	0.463753	0.544016	0.436328	0.387564	0.454641
179.69	1154	796	812	779	0.07	0.9167	0.483076	0.4636	0.543889	0.132834	0.117982	0.138415
179.81	1153	797	813	780	0.12	0.9167	0.482849	0.463397	0.543617	0.227823	0.202356	0.237386
180.09	1152	798	814	781	0.28	0.9167	0.482394	0.462857	0.543066	0.532087	0.472642	0.554547
180.25	1151	799	815	782	0.16	0.9167	0.482114	0.462485	0.542493	0.304227	0.270367	0.317139
180.41	1150	800	816	783	0.16	0.9167	0.481853	0.462197	0.542108	0.304392	0.270559	0.317337
180.5	1149	801	817	784	0.09	0.9167	0.481725	0.462	0.541941	0.171266	0.152236	0.178578
180.57	1148	802	818	785	0.07	0.9167	0.481633	0.461895	0.541751	0.133232	0.118447	0.138925
180.7	1147	803	819	786	0.13	0.9167	0.481392	0.461665	0.541515	0.247555	0.22007	0.258133
180.81	1146	804	820	787	0.11	0.9167	0.481113	0.461444	0.541303	0.209591	0.186286	0.218525
180.91	1145	805	821	788	0.1	0.9167	0.480891	0.461282	0.541076	0.190625	0.169422	0.198729
181.01	1144	806	822	789	0.1	0.9167	0.480714	0.461139	0.540857	0.190696	0.16949	0.198791
181.16	1143	807	823	790	0.15	0.9167	0.480442	0.460922	0.540477	0.286205	0.254414	0.298326
181.32	1142	808	824	791	0.16	0.9167	0.480132	0.460625	0.54009	0.305483	0.27157	0.31842
181.44	1141	809	825	792	0.12	0.9167	0.47995	0.460438	0.539764	0.229199	0.2038	0.238912
181.6	1140	810	826	793	0.16	0.9167	0.479664	0.460201	0.539345	0.305781	0.271945	0.318713
181.75	1139	811	827	794	0.15	0.9167	0.479346	0.459905	0.539063	0.28686	0.255081	0.298986
181.88	1138	812	828	795	0.13	0.9167	0.479089	0.459724	0.53881	0.248745	0.221174	0.259223
181.97	1137	813	829	796	0.09	0.9167	0.478921	0.459619	0.538614	0.172268	0.153176	0.179503
182.13	1136	814	830	797	0.16	0.9167	0.478651	0.459327	0.538294	0.306428	0.272476	0.319319
182.38	1135	815	831	798	0.25	0.9167	0.478127	0.458897	0.537662	0.479319	0.426244	0.499404
182.51	1134	816	833	799	0.13	0.9167	0.477825	0.458737	0.5374	0.249403	0.221755	0.259781
182.69	1133	817	834	800	0.18	0.9167	0.477463	0.458302	0.536976	0.345589	0.307287	0.360038
182.91	1132	818	835	801	0.22	0.9167	0.477043	0.457864	0.536494	0.422759	0.375911	0.440467
183.1	1131	819	836	802	0.19	0.9167	0.476737	0.45754	0.536147	0.365344	0.32486	0.380673
183.25	1130	820	837	803	0.15	0.9167	0.476463	0.457187	0.535927	0.288595	0.256574	0.300763
183.38	1129	821	838	804	0.13	0.9167	0.476177	0.456937	0.535756	0.250266	0.222435	0.260804
183.47	1128	822	839	805	0.09	0.9167	0.476032	0.45677	0.535586	0.173314	0.154042	0.180623
183.72	1127	823	840	806	0.25	0.9167	0.475516	0.456199	0.535073	0.48195	0.428306	0.502358
183.81	1126	824	841	807	0.09	0.9167	0.47531	0.456054	0.534853	0.173577	0.154254	0.180906
183.95	1125	825	842	808	0.14	0.9167	0.47501	0.455785	0.534606	0.27018	0.240061	0.281576
184.07	1124	826	843	809	0.12	0.9167	0.474767	0.455506	0.53432	0.231701	0.205876	0.241499
184.31	1123	827	844	810	0.24	0.9167	0.474346	0.454857	0.533787	0.463813	0.412165	0.483686
184.45	1122	828	845	811	0.14	0.9167	0.474128	0.454601	0.533524	0.270682	0.240548	0.282309
184.59	1121	829	846	812	0.14	0.9167	0.473863	0.454335	0.533267	0.270834	0.240664	0.282474
184.69	1120	830	847	813	0.1	0.9167	0.473714	0.454127	0.533096	0.193513	0.171958	0.20186
184.88	1119	831	848	814	0.19	0.9167	0.473431	0.453702	0.532712	0.367895	0.326955	0.383893
184.97	1118	832	849	815	0.09	0.9167	0.473251	0.453537	0.532568	0.174332	0.154916	0.18191
185.07	1117	833	850	816	0.1	0.9167	0.473035	0.453322	0.532339	0.193791	0.172202	0.202218
185.22	1116	834	851	817	0.15	0.9167	0.472644	0.453029	0.531823	0.290927	0.258554	0.303524
185.37	1115	835	852	818	0.15	0.9167	0.472301	0.45277	0.531401	0.291139	0.258759	0.303697
185.56	1114	836	853	819	0.19	0.9167	0.471859	0.452449	0.530963	0.369121	0.328032	0.384956
185.75	1113	837	854	820	0.19	0.9167	0.471515	0.452158	0.530507	0.36939	0.328314	0.385204
185.85	1112	838	855	821	0.1	0.9167	0.471338	0.451982	0.530287	0.194489	0.172869	0.202818
185.94	1111	839	856	822	0.09	0.9167	0.471154	0.451809	0.530112	0.175109	0.155633	0.182606
186.12	1110	840	857	823	0.18	0.9167	0.470723	0.451558	0.529813	0.350537	0.311442	0.365414
186.29	1109	841	858	824	0.17	0.9167	0.470424	0.45125	0.529588	0.331274	0.294265	0.34535
186.38	1108	842	859	825	0.09	0.9167	0.47028	0.451082	0.529439	0.175434	0.155831	0.1829
186.53	1107	843	860	826	0.15	0.9167	0.470045	0.450876	0.529186	0.292536	0.259843	0.304973
186.64	1106	844	861	827	0.11	0.9167	0.469854	0.450704	0.528978	0.214613	0.190626	0.223732
186.75	1105	845	862	828	0.11	0.9167	0.469644	0.450516	0.52874	0.214709	0.190712	0.223826
187	1104	846	863	829	0.25	0.9167	0.469106	0.450094	0.52821	0.488536	0.433871	0.509171
187.18	1103	847	865	830	0.18	0.9167	0.468779	0.449664	0.527904	0.351991	0.312568	0.366954
187.26	1102	848	866	831	0.08	0.9167	0.468632	0.44945	0.527766	0.15649	0.138956	0.163168
187.44	1101	849	867	832	0.18	0.9167	0.468325	0.449099	0.527428	0.352332	0.31285	0.367416
187.51	1100	850	867	833	0.07	0.9167	0.468193	0.448988	0.527272	0.137057	0.1217	0.142919
187.66	1099	851	868	833	0.15	0.9167	0.467965	0.44869	0.526908	0.293836	0.260966	0.306459
187.79	1098	852	869	834	0.13	0.9167	0.467756	0.448466	0.526603	0.254772	0.226301	0.265731
187.94	1097	853	870	835	0.15	0.9167	0.467533	0.448184	0.526212	0.294108	0.261311	0.306805
188.09	1096	854	872	837	0.15	0.9167	0.467273	0.44796	0.525894	0.294271	0.261469	0.306958
188.26	1095	855	873	838	0.17	0.9167	0.467019	0.447655	0.525572	0.333689	0.296513	0.348123
188.44	1094	856	874	839	0.18	0.9167	0.46672	0.447271	0.525176	0.353544	0.314192	0.368917
188.56	1093	857	875	840	0.12	0.9167	0.466527	0.446981	0.524961	0.235794	0.209547	0.246104
188.66	1092	858	876	841	0.1	0.9167	0.466393	0.446751	0.524822	0.196551	0.174669	0.205193
188.79	1091	859	877	842	0.13	0.9167	0.466204	0.4465	0.524656	0.25562	0.227141	0.2669
188.91	1090	860	878	843	0.12	0.9167	0.466018	0.446293	0.524453	0.236051	0.20975	0.246484
189.03	1089	861	879	843	0.12	0.9167	0.465816	0.44603	0.52418	0.236153	0.209859	0.246629
189.23	1088	862	880	845	0.2	0.9167	0.46551	0.44565	0.523818	0.393847	0.350007	0.411399
189.34	1087	863	881	846	0.11	0.9167	0.465329	0.44544	0.523599	0.2167	0.192584	0.226376
189.47	1086	864	882	846	0.13	0.9167	0.465141	0.445199	0.523349	0.256204	0.227709	0.26768
189.64	1085	865	883	848	0.17	0.9167	0.46485	0.444843	0.522976	0.335246	0.297985	0.350323
189.76	1084	866	884	849	0.12	0.9167	0.464625	0.44463	0.522713	0.236759	0.210448	0.247406
189.88	1083	867	885	850	0.12	0.9167	0.464407	0.444382	0.52235	0.23687	0.210594	0.247544
189.98	1082	868	886	851	0.1	0.9167	0.464221	0.444168	0.52201	0.197471	0.17561	0.206386
190.06	1081	869	887	851	0.08	0.9167	0.464058	0.44401	0.521765	0.158032	0.140554	0.165167
190.14	1080	870	888	852	0.08	0.9167	0.463877	0.443865	0.521675	0.158094	0.140578	0.165221
190.26	1079	871	889	853	0.12	0.9167	0.463665	0.443578	0.521449	0.237249	0.210958	0.247993
190.38	1078	872	890	854	0.12	0.9167	0.463509	0.443361	0.521168	0.237329	0.211072	0.248114
190.54	1077	873	891	855	0.16	0.9167	0.46323	0.443105	0.520851	0.316629	0.281601	0.331009
190.63	1076	874	892	856	0.09	0.9167	0.463064	0.442938	0.520612	0.178168	0.158473	0.186263
190.79	1075	875	893	857	0.16	0.9167	0.462705	0.442594	0.520307	0.316988	0.281895	0.331391
190.91	1074	876	894	858	0.12	0.9167	0.462438	0.442361	0.520053	0.237879	0.211524	0.248675
191.06	1073	877	895	859	0.15	0.9167	0.462131	0.442059	0.519639	0.297545	0.264616	0.311055
191.16	1072	878	896	860	0.1	0.9167	0.461964	0.441864	0.519406	0.198436	0.17649	0.207462
191.28	1071	879	896	860	0.12	0.9167	0.461735	0.44163	0.519102	0.238241	0.211912	0.249086
191.38	1070	880	897	861	0.1	0.9167	0.461511	0.441472	0.518882	0.19863	0.176668	0.207646
191.51	1069	881	898	862	0.13	0.9167	0.461252	0.441184	0.518649	0.258364	0.229772	0.270116
191.6	1068	882	899	863	0.09	0.9167	0.461108	0.440926	0.518476	0.178923	0.159126	0.187113
191.76	1067	883	900	864	0.16	0.9167	0.460853	0.440567	0.518176	0.318262	0.283055	0.332917
192.01	1066	884	902	865	0.25	0.9167	0.460366	0.440083	0.5177	0.497811	0.442679	0.520754
192.16	1065	885	903	867	0.15	0.9167	0.460086	0.439793	0.517488	0.298868	0.265716	0.312659
192.29	1064	886	904	868	0.13	0.9167	0.459845	0.43961	0.517262	0.259155	0.230388	0.271084
192.45	1063	887	905	869	0.16	0.9167	0.459537	0.439388	0.516841	0.319173	0.283785	0.333809
192.59	1062	888	906	870	0.14	0.9167	0.459333	0.439135	0.516459	0.279401	0.248496	0.292252
192.72	1061	889	907	871	0.13	0.9167	0.459122	0.438897	0.516139	0.259563	0.23089	0.271524
192.82	1060	890	908	872	0.1	0.9167	0.458985	0.438667	0.515879	0.199723	0.177697	0.208974
192.91	1059	891	909	872	0.09	0.9167	0.458844	0.438445	0.515637	0.179806	0.160002	0.188172
192.98	1058	892	910	873	0.07	0.9167	0.458738	0.438289	0.515443	0.139882	0.124493	0.146408
193.09	1057	893	911	874	0.11	0.9167	0.458565	0.438091	0.515188	0.219897	0.195728	0.230174
193.19	1056	894	912	875	0.1	0.9167	0.458358	0.437922	0.515021	0.199996	0.177993	0.209329
193.31	1055	895	913	876	0.12	0.9167	0.458092	0.437696	0.514791	0.240135	0.213687	0.251325
193.45	1054	896	914	877	0.14	0.9167	0.457839	0.437477	0.514462	0.280313	0.249461	0.293359
193.57	1053	897	915	878	0.12	0.9167	0.457595	0.437248	0.514116	0.240396	0.213967	0.251582
193.7	1052	898	916	879	0.13	0.9167	0.457357	0.436927	0.513711	0.260564	0.231981	0.272748
193.78	1051	899	917	880	0.08	0.9167	0.457222	0.43677	0.513513	0.160395	0.142812	0.167905
193.89	1050	900	918	881	0.11	0.9167	0.45703	0.436611	0.513332	0.220635	0.196436	0.230954
194.01	1049	901	919	882	0.12	0.9167	0.456835	0.436433	0.51308	0.240796	0.214399	0.252052
194.16	1048	902	920	883	0.15	0.9167	0.456576	0.436197	0.512766	0.301166	0.268164	0.315236
194.31	1047	903	921	884	0.15	0.9167	0.4563	0.435895	0.512385	0.301348	0.268363	0.315454
194.44	1046	904	922	885	0.13	0.9167	0.456058	0.435671	0.512102	0.261307	0.23271	0.273534
194.63	1045	905	923	886	0.19	0.9167	0.455707	0.435334	0.511704	0.382204	0.340378	0.40009
194.73	1044	906	924	887	0.1	0.9167	0.455524	0.43516	0.511526	0.201241	0.179209	0.210658
194.84	1043	907	925	888	0.11	0.9167	0.455344	0.434915	0.511313	0.221453	0.197212	0.231855
194.98	1042	908	926	889	0.14	0.9167	0.455068	0.434639	0.511043	0.282019	0.25113	0.295275
195.1	1041	909	927	890	0.12	0.9167	0.454813	0.434414	0.510858	0.241866	0.215332	0.253224
195.18	1040	910	928	891	0.08	0.9167	0.454665	0.434273	0.510726	0.161297	0.143592	0.168871
195.26	1039	911	929	892	0.08	0.9167	0.454524	0.434104	0.510579	0.161347	0.143633	0.168937
195.35	1038	912	930	893	0.09	0.9167	0.454321	0.433913	0.510459	0.181596	0.161625	0.190137
195.5	1037	913	931	893	0.15	0.9167	0.453979	0.433638	0.510154	0.302889	0.269536	0.317096
195.6	1036	914	932	894	0.1	0.9167	0.453806	0.43348	0.509998	0.202003	0.179746	0.211475
195.72	1035	915	933	895	0.12	0.9167	0.453581	0.4333	0.509832	0.242523	0.215765	0.253875
195.84	1034	916	934	896	0.12	0.9167	0.453397	0.433081	0.509617	0.242622	0.215856	0.254003
195.95	1033	917	935	897	0.11	0.9167	0.453205	0.43286	0.509401	0.222498	0.197952	0.232955
196.1	1032	918	936	898	0.15	0.9167	0.452961	0.4326	0.509167	0.303569	0.270059	0.317857
196.23	1031	919	937	899	0.13	0.9167	0.45268	0.432328	0.50901	0.263256	0.234123	0.27565
196.45	1030	920	938	900	0.22	0.9167	0.452315	0.431855	0.508572	0.445871	0.39655	0.466994
196.66	1029	921	940	902	0.21	0.9167	0.451982	0.431501	0.508199	0.425917	0.378802	0.446134
196.7	1028	922	941	903	0.04	0.9167	0.451914	0.43144	0.508148	0.0811392	0.07216	0.0849898
196.85	1027	923	942	904	0.15	0.9167	0.451616	0.431198	0.50784	0.304473	0.270764	0.318891
197	1026	924	943	905	0.15	0.9167	0.451392	0.430923	0.507474	0.304624	0.27096	0.319094
197.1	1025	925	944	906	0.1	0.9167	0.451216	0.430678	0.507266	0.203162	0.180714	0.21285
197.29	1024	926	945	907	0.19	0.9167	0.450894	0.430214	0.506876	0.386284	0.343621	0.404852
197.35	1023	927	946	908	0.06	0.9167	0.450766	0.430112	0.506763	0.122019	0.108536	0.127878
197.51	1022	928	947	909	0.16	0.9167	0.450438	0.429825	0.506372	0.325621	0.289653	0.341236
197.69	1021	929	948	910	0.18	0.9167	0.450121	0.429465	0.506013	0.366581	0.326091	0.384213
197.82	1020	930	949	911	0.13	0.9167	0.449891	0.429115	0.505815	0.264889	0.235602	0.277713
197.99	1019	931	950	912	0.17	0.9167	0.449546	0.428779	0.50551	0.346659	0.308281	0.363448
198.08	1018	932	951	913	0.09	0.9167	0.449407	0.428622	0.505339	0.183582	0.163263	0.192484
198.2	1017	933	952	914	0.12	0.9167	0.44921	0.42836	0.505068	0.244883	0.217801	0.256802
198.33	1016	934	953	915	0.13	0.9167	0.449023	0.428097	0.50473	0.265401	0.236108	0.278374
198.41	1015	935	954	916	0.08	0.9167	0.448887	0.427919	0.504538	0.163373	0.145353	0.171378
198.56	1014	936	955	917	0.15	0.9167	0.448635	0.427574	0.504191	0.306497	0.272724	0.321593
198.63	1013	937	956	918	0.07	0.9167	0.44852	0.427434	0.504052	0.143068	0.127306	0.150126
198.72	1012	938	957	919	0.09	0.9167	0.448366	0.427249	0.503894	0.184008	0.163731	0.193103
198.85	1011	939	958	920	0.13	0.9167	0.448097	0.426986	0.503615	0.265949	0.236631	0.279098
199.04	1010	940	959	921	0.19	0.9167	0.447702	0.426658	0.503168	0.389038	0.346152	0.408226
199.2	1009	941	960	922	0.16	0.9167	0.447454	0.426415	0.50291	0.327793	0.291647	0.343966
199.35	1008	942	961	923	0.15	0.9167	0.447227	0.426145	0.502612	0.307461	0.273581	0.322672
199.51	1007	943	962	924	0.16	0.9167	0.44697	0.425817	0.502241	0.328147	0.292035	0.344448
199.68	1006	944	963	925	0.17	0.9167	0.446626	0.425345	0.501932	0.348925	0.310479	0.366383
199.81	1005	945	964	926	0.13	0.9167	0.446266	0.425101	0.50164	0.26704	0.237563	0.280336
199.89	1004	946	965	927	0.08	0.9167	0.446086	0.424949	0.501449	0.164399	0.146248	0.172576
200.04	1003	947	966	928	0.15	0.9167	0.445841	0.424708	0.501137	0.308417	0.274386	0.323763
200.19	1002	948	967	929	0.15	0.9167	0.445546	0.424469	0.500803	0.308622	0.274569	0.323946
200.39	1001	949	968	930	0.2	0.9167	0.445229	0.424082	0.500403	0.411788	0.366385	0.432322
200.58	1000	950	970	931	0.19	0.9167	0.444863	0.423728	0.500081	0.391521	0.34829	0.411049
200.66	999	951	971	932	0.08	0.9167	0.444713	0.423572	0.499915	0.164906	0.146697	0.173137
200.79	998	952	972	933	0.13	0.9167	0.444524	0.423346	0.499612	0.268087	0.238527	0.281498
200.91	997	953	973	934	0.12	0.9167	0.444298	0.423084	0.499352	0.24759	0.220293	0.260005
201.07	996	954	974	935	0.16	0.9167	0.443974	0.422744	0.49902	0.330362	0.29392	0.346952
201.22	995	955	975	936	0.15	0.9167	0.443656	0.422473	0.498712	0.309936	0.27572	0.325476
201.32	994	956	976	937	0.1	0.9167	0.443437	0.42233	0.498515	0.206726	0.183886	0.217058
201.47	993	957	977	938	0.15	0.9167	0.443131	0.422063	0.498265	0.310303	0.275967	0.325793
201.57	992	958	978	939	0.1	0.9167	0.442929	0.421831	0.498036	0.206963	0.184063	0.217315
201.69	991	959	979	940	0.12	0.9167	0.442719	0.42159	0.497668	0.248474	0.221039	0.260926
201.81	990	960	980	941	0.12	0.9167	0.442526	0.421346	0.497346	0.248582	0.221182	0.261078
201.89	989	961	981	942	0.08	0.9167	0.442419	0.421146	0.497182	0.165761	0.147503	0.174134
202	988	962	982	943	0.11	0.9167	0.442253	0.420857	0.496985	0.228008	0.202897	0.239599
202.07	987	963	983	944	0.07	0.9167	0.442127	0.420692	0.496851	0.145137	0.129151	0.152532
202.22	986	964	984	945	0.15	0.9167	0.441855	0.420414	0.496511	0.3112	0.276943	0.32707
202.29	985	965	985	946	0.07	0.9167	0.441722	0.420285	0.496392	0.14527	0.129271	0.15268
202.38	984	966	985	946	0.09	0.9167	0.441499	0.420097	0.49626	0.18687	0.16625	0.19639
202.51	983	967	986	947	0.13	0.9167	0.441164	0.419835	0.496086	0.270129	0.240222	0.283852
202.62	982	968	987	948	0.11	0.9167	0.440971	0.419608	0.495918	0.22867	0.203334	0.240312
202.69	981	969	988	949	0.07	0.9167	0.440842	0.419486	0.495803	0.14556	0.129425	0.152971
202.76	980	970	989	950	0.07	0.9167	0.440719	0.419345	0.495659	0.145601	0.129462	0.153022
202.91	979	971	990	951	0.15	0.9167	0.440479	0.419028	0.495364	0.312171	0.277584	0.328152
203.01	978	972	991	952	0.1	0.9167	0.440328	0.418805	0.495141	0.208186	0.185139	0.218885
203.12	977	973	992	953	0.11	0.9167	0.440154	0.418618	0.494862	0.229095	0.203768	0.240881
203.19	976	974	993	954	0.07	0.9167	0.440032	0.418517	0.494677	0.145828	0.129719	0.153325
203.38	975	975	994	955	0.19	0.9167	0.439678	0.418204	0.494336	0.396138	0.352337	0.416478
203.51	974	976	996	957	0.13	0.9167	0.439438	0.417895	0.494098	0.271189	0.241189	0.28517
203.63	973	977	997	958	0.12	0.9167	0.439221	0.417604	0.493877	0.250453	0.222736	0.263417
203.75	972	978	998	959	0.12	0.9167	0.438973	0.417348	0.493687	0.250594	0.222821	0.263579
203.87	971	979	999	959	0.12	0.9167	0.438723	0.417107	0.493428	0.250737	0.222938	0.263731
204.04	970	980	1000	960	0.17	0.9167	0.438425	0.416813	0.492984	0.355452	0.316113	0.373883
204.16	969	981	1001	961	0.12	0.9167	0.438208	0.416573	0.492826	0.251031	0.22321	0.264069
204.26	968	982	1002	962	0.1	0.9167	0.438051	0.416386	0.492675	0.209268	0.186066	0.220156
204.33	967	983	1003	963	0.07	0.9167	0.437929	0.416262	0.492564	0.146528	0.130275	0.154155
204.47	966	984	1004	964	0.14	0.9167	0.437656	0.415995	0.492334	0.293239	0.260673	0.308509
204.57	965	985	1005	965	0.1	0.9167	0.437468	0.415826	0.49214	0.209547	0.186268	0.220453
204.75	964	986	1006	966	0.18	0.9167	0.437116	0.415537	0.491799	0.377488	0.335515	0.397091
204.89	963	987	1007	967	0.14	0.9167	0.436853	0.415292	0.491516	0.293779	0.261106	0.309031
205.04	962	988	1008	968	0.15	0.9167	0.436601	0.415001	0.491261	0.314944	0.279902	0.331336
205.16	961	989	1009	969	0.12	0.9167	0.43639	0.414725	0.491024	0.252077	0.22403	0.265245
205.26	960	990	1010	970	0.1	0.9167	0.436215	0.414553	0.490762	0.210149	0.186791	0.22113
205.41	959	991	1011	971	0.15	0.9167	0.435931	0.414335	0.49048	0.315429	0.280348	0.331869
205.57	958	992	1012	972	0.16	0.9167	0.435624	0.41405	0.490187	0.336694	0.299216	0.354237
205.64	957	993	1013	973	0.07	0.9167	0.435494	0.413921	0.490048	0.147348	0.130944	0.155027
205.76	956	994	1014	974	0.12	0.9167	0.435264	0.413679	0.48977	0.252729	0.224603	0.265916
205.88	955	995	1015	975	0.12	0.9167	0.435028	0.413464	0.489525	0.252866	0.224716	0.266055
206.04	954	996	1016	976	0.16	0.9167	0.434699	0.413141	0.489263	0.33741	0.299782	0.355017
206.13	953	997	1017	977	0.09	0.9167	0.434557	0.412966	0.489108	0.189856	0.168681	0.199782
206.26	952	998	1018	978	0.13	0.9167	0.434358	0.412782	0.488913	0.274361	0.243747	0.288702
206.41	951	999	1019	979	0.15	0.9167	0.434114	0.412543	0.488612	0.316749	0.281419	0.333311
206.54	950	1000	1020	980	0.13	0.9167	0.4338	0.412309	0.488366	0.274714	0.24402	0.289033
206.64	949	1001	1021	981	0.1	0.9167	0.433567	0.412136	0.488205	0.211432	0.187769	0.222426
206.83	948	1002	1022	982	0.19	0.9167	0.433189	0.411766	0.487747	0.402072	0.357097	0.42299
206.91	947	1003	1023	983	0.08	0.9167	0.433041	0.411614	0.487571	0.169351	0.150411	0.178167
207.01	946	1004	1024	984	0.1	0.9167	0.43287	0.411449	0.487368	0.211773	0.188092	0.222798
207.12	945	1005	1025	985	0.11	0.9167	0.432653	0.411293	0.487175	0.233066	0.206983	0.245171
207.26	944	1006	1026	986	0.14	0.9167	0.432383	0.41102	0.486961	0.296815	0.263549	0.312242
207.41	943	1007	1027	987	0.15	0.9167	0.43214	0.410716	0.486698	0.318195	0.282526	0.334794
207.51	942	1008	1028	988	0.1	0.9167	0.431964	0.410537	0.486558	0.212217	0.188405	0.223293
207.66	941	1009	1029	989	0.15	0.9167	0.43171	0.410308	0.486208	0.318513	0.282811	0.335126
207.77	940	1010	1030	990	0.11	0.9167	0.431541	0.410099	0.485866	0.233667	0.207541	0.245884
207.89	939	1011	1031	991	0.12	0.9167	0.431363	0.409879	0.485579	0.255015	0.226542	0.268382
207.98	938	1012	1032	992	0.09	0.9167	0.43121	0.409724	0.485425	0.191329	0.16996	0.201362
208.13	937	1013	1033	993	0.15	0.9167	0.430912	0.409476	0.485131	0.319103	0.283439	0.335808
208.35	936	1014	1034	994	0.22	0.9167	0.43041	0.409087	0.484673	0.468562	0.416103	0.492986
208.48	935	1015	1036	995	0.13	0.9167	0.430162	0.40886	0.484291	0.277037	0.246073	0.291471
208.58	934	1016	1037	996	0.1	0.9167	0.430003	0.408711	0.484071	0.213185	0.189373	0.22429
208.7	933	1017	1038	997	0.12	0.9167	0.429753	0.408466	0.483873	0.25597	0.22734	0.26931
208.85	932	1018	1039	998	0.15	0.9167	0.429487	0.408222	0.483535	0.320161	0.284374	0.336839
208.94	931	1019	1040	999	0.09	0.9167	0.42932	0.408084	0.483344	0.192171	0.170692	0.202172
209.01	930	1020	1041	1000	0.07	0.9167	0.42917	0.407976	0.483199	0.149519	0.1328	0.157286
209.1	929	1021	1042	1001	0.09	0.9167	0.429002	0.407841	0.483009	0.192314	0.17081	0.202292
209.2	928	1022	1042	1002	0.1	0.9167	0.428875	0.407669	0.482726	0.213745	0.189901	0.224864
209.33	927	1023	1043	1003	0.13	0.9167	0.428693	0.407332	0.482498	0.277987	0.246988	0.292565
209.44	926	1024	1044	1004	0.11	0.9167	0.428509	0.407097	0.482213	0.23532	0.209113	0.247698
209.6	925	1025	1045	1005	0.16	0.9167	0.428226	0.406863	0.481884	0.342511	0.304372	0.360494
209.76	924	1026	1046	1006	0.16	0.9167	0.427927	0.406565	0.481602	0.34275	0.30455	0.360759
209.85	923	1027	1047	1007	0.09	0.9167	0.427775	0.406408	0.48147	0.192865	0.171356	0.203005
209.97	922	1028	1048	1008	0.12	0.9167	0.427578	0.406169	0.481293	0.257272	0.228559	0.270833
210.07	921	1029	1049	1009	0.1	0.9167	0.427435	0.405934	0.481101	0.214465	0.190542	0.225825
210.19	920	1030	1050	1009	0.12	0.9167	0.427235	0.40571	0.480873	0.257479	0.228759	0.27114
210.26	919	1031	1051	1010	0.07	0.9167	0.427098	0.405596	0.480761	0.150244	0.133474	0.158209
210.45	918	1032	1052	1011	0.19	0.9167	0.426735	0.405147	0.480193	0.408152	0.362715	0.429901
210.6	917	1033	1053	1012	0.15	0.9167	0.42651	0.404821	0.479859	0.322396	0.286553	0.339669
210.66	916	1034	1054	1013	0.06	0.9167	0.426427	0.404727	0.479747	0.128984	0.114648	0.135899
210.75	915	1035	1055	1014	0.09	0.9167	0.42627	0.404598	0.479574	0.193546	0.172034	0.203913
210.85	914	1036	1056	1015	0.1	0.9167	0.426088	0.404445	0.479404	0.215144	0.191216	0.226656
210.95	913	1037	1057	1016	0.1	0.9167	0.425916	0.404286	0.479258	0.21523	0.191275	0.226745
211.1	912	1038	1058	1017	0.15	0.9167	0.425667	0.404022	0.479012	0.323034	0.287059	0.340341
211.18	911	1039	1059	1018	0.08	0.9167	0.425535	0.403882	0.478857	0.172338	0.153148	0.181578
211.31	910	1040	1060	1019	0.13	0.9167	0.425332	0.403684	0.478595	0.280183	0.249002	0.295209
211.41	909	1041	1061	1020	0.1	0.9167	0.425146	0.403542	0.478405	0.21562	0.191616	0.227163
211.52	908	1042	1062	1021	0.11	0.9167	0.424892	0.40337	0.478189	0.237324	0.210873	0.249986
211.69	907	1043	1063	1022	0.17	0.9167	0.424533	0.40307	0.477891	0.367083	0.326097	0.38663
211.79	906	1044	1064	1023	0.1	0.9167	0.424385	0.402906	0.477662	0.216006	0.191914	0.227522
211.91	905	1045	1065	1024	0.12	0.9167	0.424219	0.402669	0.477367	0.259309	0.230439	0.273187
212.01	904	1046	1066	1025	0.1	0.9167	0.424056	0.402451	0.477178	0.216174	0.192109	0.227779
212.16	903	1047	1067	1026	0.15	0.9167	0.42379	0.402199	0.476918	0.324465	0.28832	0.341883
212.29	902	1048	1068	1027	0.13	0.9167	0.423494	0.402006	0.476717	0.281399	0.249983	0.296441
212.37	901	1049	1069	1028	0.08	0.9167	0.42333	0.401875	0.476607	0.173236	0.153871	0.182485
212.48	900	1050	1070	1029	0.11	0.9167	0.423163	0.401703	0.476331	0.238293	0.211695	0.251023
212.56	899	1051	1071	1030	0.08	0.9167	0.423052	0.401591	0.476129	0.17335	0.154025	0.182614
212.68	898	1052	1072	1031	0.12	0.9167	0.422822	0.401428	0.475894	0.260166	0.231152	0.274032
212.81	897	1053	1073	1032	0.13	0.9167	0.422608	0.401233	0.475644	0.281989	0.250546	0.297012
212.91	896	1054	1074	1033	0.1	0.9167	0.422456	0.40103	0.475381	0.216993	0.192835	0.228586
213	895	1055	1075	1034	0.09	0.9167	0.422343	0.400835	0.475099	0.195346	0.173654	0.205828
213.19	894	1056	1076	1035	0.19	0.9167	0.422016	0.40043	0.474707	0.412717	0.366906	0.434965
213.31	893	1057	1077	1036	0.12	0.9167	0.421831	0.400198	0.474476	0.260777	0.231843	0.274874
213.43	892	1058	1078	1037	0.12	0.9167	0.421624	0.399987	0.474234	0.260905	0.231961	0.275019
213.52	891	1059	1079	1038	0.09	0.9167	0.421452	0.399817	0.47404	0.195759	0.174042	0.206352
213.6	890	1060	1080	1039	0.08	0.9167	0.42132	0.399657	0.473866	0.174062	0.154761	0.183497
213.72	889	1061	1081	1040	0.12	0.9167	0.421118	0.399422	0.473627	0.261219	0.232259	0.275408
213.79	888	1062	1082	1041	0.07	0.9167	0.420999	0.399292	0.473509	0.152421	0.135518	0.160707
213.97	887	1063	1083	1042	0.18	0.9167	0.420712	0.398929	0.473126	0.392206	0.348757	0.413623
214.16	886	1064	1084	1043	0.19	0.9167	0.42033	0.398568	0.472705	0.414372	0.36846	0.436997
214.29	885	1065	1085	1044	0.13	0.9167	0.4201	0.398351	0.472537	0.283673	0.252194	0.299161
214.38	884	1066	1086	1045	0.09	0.9167	0.419953	0.398213	0.472397	0.196458	0.174647	0.207183
214.51	883	1067	1087	1046	0.13	0.9167	0.419781	0.398009	0.472168	0.283889	0.252391	0.299418
214.63	882	1068	1088	1047	0.12	0.9167	0.419629	0.397773	0.471879	0.262146	0.233119	0.276549
214.76	881	1069	1089	1048	0.13	0.9167	0.419412	0.397528	0.471538	0.284139	0.252728	0.29978
214.97	880	1070	1090	1049	0.21	0.9167	0.419048	0.397069	0.471095	0.459391	0.408637	0.48482
215.07	879	1071	1092	1051	0.1	0.9167	0.418826	0.396878	0.470892	0.218874	0.194673	0.230978
215.16	878	1072	1092	1051	0.09	0.9167	0.41862	0.396728	0.470761	0.197083	0.175254	0.207959
215.32	877	1073	1094	1052	0.16	0.9167	0.418296	0.396431	0.470429	0.350642	0.311784	0.369981
215.44	876	1074	1095	1054	0.12	0.9167	0.418092	0.396212	0.47021	0.26311	0.233947	0.277639
215.56	875	1075	1096	1054	0.12	0.9167	0.417923	0.395968	0.469983	0.263216	0.23406	0.277811
215.75	874	1076	1097	1056	0.19	0.9167	0.417536	0.395576	0.469631	0.417145	0.370872	0.440302
215.83	873	1077	1098	1057	0.08	0.9167	0.417388	0.395429	0.469507	0.175702	0.156198	0.185459
216	872	1078	1099	1058	0.17	0.9167	0.417049	0.395094	0.46924	0.373671	0.332109	0.394435
216.12	871	1079	1100	1059	0.12	0.9167	0.416795	0.394793	0.469039	0.263928	0.234531	0.278637
216.22	870	1080	1101	1060	0.1	0.9167	0.416598	0.394602	0.468857	0.220044	0.195518	0.23231
216.32	869	1081	1102	1061	0.1	0.9167	0.416428	0.394446	0.468638	0.220134	0.195609	0.232402
216.39	868	1082	1103	1062	0.07	0.9167	0.416306	0.394349	0.468475	0.154139	0.136974	0.162721
216.51	867	1083	1104	1062	0.12	0.9167	0.41609	0.394164	0.468223	0.264375	0.234939	0.279082
216.63	866	1084	1105	1063	0.12	0.9167	0.415854	0.393985	0.468055	0.264525	0.235024	0.279209
216.72	865	1085	1106	1064	0.09	0.9167	0.415698	0.393814	0.467933	0.198469	0.176314	0.209497
216.95	864	1086	1107	1065	0.23	0.9167	0.415262	0.393319	0.467534	0.50773	0.450964	0.536056
217.1	863	1087	1108	1066	0.15	0.9167	0.414975	0.393085	0.467208	0.331357	0.294312	0.34981
217.2	862	1088	1109	1067	0.1	0.9167	0.414807	0.392897	0.467029	0.220994	0.196283	0.233318
217.32	861	1089	1110	1068	0.12	0.9167	0.414624	0.3926	0.46681	0.265311	0.23565	0.280194
217.41	860	1090	1111	1070	0.09	0.9167	0.414494	0.392383	0.466606	0.199045	0.176815	0.210261
217.5	859	1091	1112	1070	0.09	0.9167	0.414353	0.392193	0.466441	0.199113	0.176878	0.210363
217.6	858	1092	1113	1071	0.1	0.9167	0.414175	0.391977	0.466308	0.221331	0.196587	0.233866
217.72	857	1093	1114	1072	0.12	0.9167	0.413925	0.391703	0.466132	0.265758	0.235993	0.280835
217.85	856	1094	1115	1073	0.13	0.9167	0.413699	0.391403	0.465908	0.288062	0.255782	0.304471
217.95	855	1095	1116	1074	0.1	0.9167	0.413495	0.391196	0.465733	0.221695	0.196829	0.234333
218.08	854	1096	1117	1075	0.13	0.9167	0.413228	0.390943	0.465501	0.288391	0.256006	0.30483
218.17	853	1097	1118	1076	0.09	0.9167	0.413082	0.390781	0.465326	0.199726	0.177302	0.211123
218.32	852	1098	1119	1077	0.15	0.9167	0.412834	0.39056	0.465032	0.333076	0.295689	0.352071
218.47	851	1099	1120	1078	0.15	0.9167	0.412559	0.390341	0.464807	0.333298	0.295832	0.352269
218.57	850	1100	1121	1079	0.1	0.9167	0.412371	0.39011	0.464654	0.2223	0.197287	0.234985
218.67	849	1101	1122	1080	0.1	0.9167	0.412168	0.389903	0.46446	0.222409	0.197369	0.23511
218.76	848	1102	1123	1081	0.09	0.9167	0.411987	0.389734	0.464277	0.200256	0.177702	0.211691
218.83	847	1103	1124	1082	0.07	0.9167	0.41186	0.389603	0.464137	0.155803	0.138254	0.164704
219.04	846	1104	1125	1083	0.21	0.9167	0.411458	0.389267	0.463775	0.467866	0.415087	0.494537
219.14	845	1105	1126	1084	0.1	0.9167	0.411231	0.389051	0.463642	0.222916	0.197717	0.235625
219.25	844	1106	1127	1085	0.11	0.9167	0.411031	0.388801	0.463425	0.245327	0.217591	0.259354
219.39	843	1107	1128	1086	0.14	0.9167	0.410796	0.388549	0.463153	0.312413	0.277096	0.330301
219.6	842	1108	1129	1087	0.21	0.9167	0.410518	0.388074	0.46281	0.468937	0.415953	0.496058
219.72	841	1109	1131	1088	0.12	0.9167	0.410313	0.387817	0.462614	0.268098	0.237788	0.283649
219.82	840	1110	1131	1089	0.1	0.9167	0.410102	0.387621	0.462451	0.22353	0.198226	0.236494
219.94	839	1111	1132	1090	0.12	0.9167	0.40985	0.387341	0.462225	0.268401	0.237988	0.283998
220.07	838	1112	1134	1091	0.13	0.9167	0.409616	0.38699	0.462027	0.290933	0.257931	0.307943
220.19	837	1113	1135	1092	0.12	0.9167	0.409444	0.386755	0.461827	0.268666	0.238193	0.284428
220.33	836	1114	1136	1093	0.14	0.9167	0.409198	0.38651	0.461557	0.313633	0.278055	0.332043
220.42	835	1115	1137	1094	0.09	0.9167	0.409051	0.386301	0.461424	0.201694	0.178801	0.213572
220.56	834	1116	1138	1095	0.14	0.9167	0.408819	0.38602	0.461211	0.313924	0.278263	0.332465
220.69	833	1117	1139	1097	0.13	0.9167	0.40856	0.385768	0.461024	0.291685	0.258492	0.308919
220.83	832	1118	1140	1098	0.14	0.9167	0.408268	0.385515	0.46079	0.314348	0.278517	0.3329
220.89	831	1119	1141	1099	0.06	0.9167	0.40813	0.385413	0.460622	0.134766	0.119408	0.142709
220.98	830	1120	1142	1100	0.09	0.9167	0.407921	0.385251	0.460388	0.202252	0.179203	0.214154
221.08	829	1121	1143	1101	0.1	0.9167	0.407709	0.385063	0.46018	0.224842	0.199205	0.238065
221.25	828	1122	1144	1102	0.17	0.9167	0.407395	0.384795	0.459948	0.382526	0.338819	0.404992
221.41	827	1123	1145	1103	0.16	0.9167	0.407105	0.384512	0.459649	0.36028	0.319096	0.38145
221.54	826	1124	1146	1104	0.13	0.9167	0.406857	0.384288	0.459439	0.292906	0.259384	0.310109
221.66	825	1125	1147	1105	0.12	0.9167	0.406579	0.384063	0.459197	0.27056	0.239557	0.286421
221.78	824	1126	1148	1106	0.12	0.9167	0.406333	0.383891	0.4589	0.270724	0.239712	0.28655
221.85	823	1127	1149	1107	0.07	0.9167	0.406209	0.38379	0.458767	0.15797	0.139873	0.167198
222.01	822	1128	1150	1108	0.16	0.9167	0.405955	0.38354	0.458513	0.361301	0.319886	0.382416
222.1	821	1129	1151	1109	0.09	0.9167	0.405822	0.383395	0.458313	0.203299	0.180015	0.21519
222.22	820	1130	1152	1110	0.12	0.9167	0.405596	0.383224	0.458026	0.271216	0.24017	0.287049
222.33	819	1131	1153	1111	0.11	0.9167	0.405363	0.383059	0.457815	0.248757	0.220257	0.263241
222.44	818	1132	1154	1112	0.11	0.9167	0.405151	0.382801	0.457612	0.248888	0.220355	0.263419
222.51	817	1133	1155	1113	0.07	0.9167	0.405034	0.382647	0.457503	0.158429	0.140259	0.167698
222.62	816	1134	1156	1114	0.11	0.9167	0.404864	0.382462	0.457319	0.249064	0.220496	0.263653
222.72	815	1135	1157	1115	0.1	0.9167	0.40469	0.382308	0.457187	0.226519	0.200509	0.23978
222.83	814	1136	1158	1116	0.11	0.9167	0.404498	0.38207	0.456998	0.249289	0.220651	0.263923
222.97	813	1137	1159	1117	0.14	0.9167	0.404246	0.381839	0.456753	0.317475	0.280979	0.336105
223.12	812	1138	1160	1118	0.15	0.9167	0.403951	0.381607	0.456528	0.3404	0.301197	0.360332
223.19	811	1139	1161	1119	0.07	0.9167	0.403786	0.3815	0.456435	0.158918	0.140587	0.168202
223.26	810	1140	1162	1119	0.07	0.9167	0.403613	0.381387	0.45634	0.158987	0.140617	0.168252
223.39	809	1141	1163	1120	0.13	0.9167	0.40332	0.38118	0.456145	0.295475	0.261257	0.312637
223.47	808	1142	1164	1121	0.08	0.9167	0.403168	0.381053	0.455999	0.181899	0.160825	0.192456
223.62	807	1143	1165	1122	0.15	0.9167	0.402917	0.380793	0.455754	0.341274	0.301709	0.361101
223.72	806	1144	1166	1123	0.1	0.9167	0.402684	0.380606	0.455552	0.227648	0.201228	0.240853
223.82	805	1145	1167	1124	0.1	0.9167	0.402497	0.38038	0.455333	0.227753	0.201325	0.240996
223.97	804	1146	1168	1125	0.15	0.9167	0.402204	0.380116	0.45505	0.341879	0.302175	0.361745
224.07	803	1147	1169	1126	0.1	0.9167	0.402023	0.379947	0.454919	0.228022	0.201508	0.24127
224.13	802	1148	1169	1126	0.06	0.9167	0.401918	0.379833	0.454836	0.136849	0.120927	0.144806
224.23	801	1149	1170	1127	0.1	0.9167	0.401771	0.379615	0.454683	0.228165	0.201613	0.241482
224.33	800	1150	1171	1128	0.1	0.9167	0.401608	0.379375	0.454518	0.228257	0.201686	0.241634
224.44	799	1151	1172	1129	0.11	0.9167	0.401399	0.379141	0.454377	0.251214	0.221924	0.265961
224.54	798	1152	1173	1130	0.1	0.9167	0.401239	0.378939	0.454244	0.228467	0.201808	0.241912
224.67	797	1153	1174	1131	0.13	0.9167	0.401025	0.37871	0.454078	0.297166	0.262446	0.314676
224.78	796	1154	1175	1132	0.11	0.9167	0.400848	0.378566	0.453886	0.251559	0.222164	0.266366
224.87	795	1155	1176	1133	0.09	0.9167	0.40069	0.378469	0.453689	0.205902	0.181849	0.217992
224.94	794	1156	1177	1134	0.07	0.9167	0.40057	0.378391	0.453533	0.160194	0.141487	0.169584
225.07	793	1157	1178	1135	0.13	0.9167	0.400298	0.378218	0.45326	0.297706	0.26292	0.315085
225.19	792	1158	1179	1136	0.12	0.9167	0.400087	0.377994	0.453008	0.27495	0.24283	0.291021
225.31	791	1159	1180	1137	0.12	0.9167	0.399903	0.377817	0.452794	0.275076	0.242945	0.291157
225.41	790	1160	1181	1138	0.1	0.9167	0.399766	0.377679	0.452631	0.229309	0.202527	0.242719
225.47	789	1161	1182	1139	0.06	0.9167	0.399681	0.37758	0.452521	0.137615	0.121546	0.14567
225.6	788	1162	1183	1140	0.13	0.9167	0.399454	0.377386	0.452256	0.298335	0.263503	0.31578
225.72	787	1163	1184	1141	0.12	0.9167	0.39922	0.377225	0.452109	0.275547	0.243313	0.291614
225.81	786	1164	1185	1142	0.09	0.9167	0.399043	0.377101	0.451897	0.206752	0.182571	0.218782
225.91	785	1165	1186	1143	0.1	0.9167	0.398855	0.376972	0.451686	0.229833	0.202951	0.243175
226	784	1166	1187	1144	0.09	0.9167	0.398685	0.376858	0.451517	0.206938	0.182724	0.218923
226.1	783	1167	1188	1145	0.1	0.9167	0.398472	0.376714	0.451363	0.230054	0.203096	0.243341
226.22	782	1168	1189	1146	0.12	0.9167	0.398237	0.376501	0.451221	0.276228	0.243792	0.292174
226.31	781	1169	1190	1147	0.09	0.9167	0.398091	0.376355	0.451061	0.207246	0.182909	0.219216
226.38	780	1170	1191	1148	0.07	0.9167	0.397979	0.376256	0.450903	0.161237	0.142312	0.170546
226.53	779	1171	1192	1149	0.15	0.9167	0.397761	0.376056	0.450596	0.345697	0.305163	0.365651
226.62	778	1172	1193	1150	0.09	0.9167	0.397627	0.375923	0.450434	0.207488	0.183163	0.219468
226.69	777	1173	1194	1150	0.07	0.9167	0.39752	0.375827	0.450296	0.161423	0.142504	0.170741
226.79	776	1174	1195	1151	0.1	0.9167	0.397344	0.375699	0.450101	0.230707	0.203665	0.243999
226.87	775	1175	1196	1152	0.08	0.9167	0.397202	0.375598	0.449969	0.184632	0.16298	0.195251
226.97	774	1176	1197	1153	0.1	0.9167	0.39698	0.37547	0.449729	0.230918	0.203834	0.244147
227.16	773	1177	1198	1154	0.19	0.9167	0.396664	0.375142	0.449336	0.439095	0.387623	0.464285
227.29	772	1178	1199	1156	0.13	0.9167	0.39643	0.374923	0.449124	0.300611	0.265341	0.317855
227.35	771	1179	1200	1156	0.06	0.9167	0.396303	0.374835	0.449019	0.138788	0.122494	0.146736
227.44	770	1180	1201	1157	0.09	0.9167	0.396105	0.374714	0.448852	0.208286	0.183809	0.220176
227.57	769	1181	1202	1158	0.13	0.9167	0.395818	0.37451	0.448685	0.301075	0.265601	0.318205
227.66	768	1182	1203	1159	0.09	0.9167	0.395635	0.374384	0.44859	0.208533	0.183916	0.22037
227.75	767	1183	1204	1160	0.09	0.9167	0.395452	0.37425	0.448419	0.20863	0.183986	0.220449
227.94	766	1184	1205	1161	0.19	0.9167	0.395072	0.373859	0.448049	0.440864	0.388736	0.465879
228.04	765	1185	1206	1163	0.1	0.9167	0.394893	0.373645	0.447844	0.232139	0.204692	0.24534
228.12	764	1186	1207	1164	0.08	0.9167	0.394747	0.373485	0.447716	0.18578	0.1638	0.196356
228.23	763	1187	1208	1165	0.11	0.9167	0.394519	0.373322	0.44758	0.255595	0.225294	0.270107
228.44	762	1188	1209	1166	0.21	0.9167	0.394133	0.373068	0.447212	0.488432	0.430461	0.51601
228.56	761	1189	1211	1167	0.12	0.9167	0.393929	0.372902	0.44696	0.279248	0.246116	0.294994
228.63	760	1190	1212	1168	0.07	0.9167	0.393812	0.372792	0.446842	0.162943	0.143605	0.172131
228.72	759	1191	1213	1169	0.09	0.9167	0.393651	0.37264	0.446711	0.209584	0.18469	0.221401
228.81	758	1192	1214	1170	0.09	0.9167	0.393499	0.372485	0.446569	0.209665	0.184749	0.221493
228.89	757	1193	1215	1171	0.08	0.9167	0.393371	0.37236	0.446348	0.18643	0.164302	0.196949
229	756	1194	1215	1172	0.11	0.9167	0.393175	0.372204	0.44613	0.256469	0.226026	0.270919
229.1	755	1195	1216	1173	0.1	0.9167	0.392981	0.372028	0.445924	0.233268	0.205573	0.246407
229.19	754	1196	1217	1174	0.09	0.9167	0.392832	0.371847	0.445755	0.210021	0.185086	0.221874
229.26	753	1197	1218	1175	0.07	0.9167	0.392718	0.371722	0.445659	0.163397	0.143987	0.172626
229.35	752	1198	1219	1175	0.09	0.9167	0.392566	0.371566	0.445441	0.210163	0.185216	0.222041
229.44	751	1199	1220	1176	0.09	0.9167	0.392419	0.371418	0.445189	0.210242	0.185321	0.22213
229.56	750	1200	1221	1177	0.12	0.9167	0.392245	0.371266	0.444955	0.280447	0.247225	0.296294
229.63	749	1201	1222	1178	0.07	0.9167	0.392136	0.371148	0.44485	0.16364	0.144249	0.172893
229.78	748	1202	1223	1179	0.15	0.9167	0.391865	0.370878	0.444611	0.350899	0.309271	0.370756
229.91	747	1203	1224	1180	0.13	0.9167	0.391677	0.370665	0.444309	0.304258	0.268216	0.321506
230	746	1204	1226	1181	0.09	0.9167	0.391553	0.370487	0.444178	0.210707	0.185743	0.222688
230.07	745	1205	1227	1182	0.07	0.9167	0.391435	0.370353	0.444057	0.163933	0.144506	0.173264
230.16	744	1206	1227	1183	0.09	0.9167	0.391254	0.370219	0.443877	0.210868	0.185869	0.222849
230.26	743	1207	1228	1184	0.1	0.9167	0.391049	0.370085	0.443721	0.234421	0.206594	0.2477
230.33	742	1208	1229	1185	0.07	0.9167	0.390907	0.369976	0.443617	0.164154	0.144649	0.173441
230.41	741	1209	1230	1186	0.08	0.9167	0.390744	0.369847	0.443496	0.187683	0.165359	0.198287
230.48	740	1210	1231	1187	0.07	0.9167	0.390607	0.369711	0.443387	0.16428	0.144725	0.173565
230.58	739	1211	1232	1188	0.1	0.9167	0.390404	0.369538	0.4432	0.234808	0.206837	0.248067
230.72	738	1212	1233	1189	0.14	0.9167	0.390141	0.369297	0.44299	0.328953	0.289709	0.34752
230.85	737	1213	1234	1190	0.13	0.9167	0.389874	0.369059	0.442814	0.305665	0.269122	0.322905
230.97	736	1214	1235	1191	0.12	0.9167	0.389581	0.368858	0.442607	0.282365	0.248537	0.298228
231.1	735	1215	1236	1192	0.13	0.9167	0.389318	0.368628	0.442406	0.306102	0.269371	0.323283
231.19	734	1216	1237	1193	0.09	0.9167	0.389194	0.36847	0.44224	0.211984	0.186557	0.223907
231.29	733	1217	1238	1194	0.1	0.9167	0.389044	0.368311	0.442109	0.235629	0.207347	0.248893
231.41	732	1218	1239	1195	0.12	0.9167	0.388821	0.368138	0.441981	0.282917	0.248888	0.298812
231.54	731	1219	1240	1196	0.13	0.9167	0.388596	0.367913	0.441793	0.306671	0.269744	0.323911
231.64	730	1220	1241	1197	0.1	0.9167	0.388403	0.367758	0.441642	0.236018	0.207566	0.249267
231.75	729	1221	1242	1198	0.11	0.9167	0.388173	0.36761	0.441484	0.259773	0.228405	0.274304
231.88	728	1222	1243	1199	0.13	0.9167	0.387947	0.367411	0.441321	0.307184	0.270032	0.324353
232	727	1223	1244	1200	0.12	0.9167	0.387764	0.367189	0.441148	0.283688	0.249359	0.299584
232.1	726	1224	1245	1201	0.1	0.9167	0.387607	0.366996	0.440932	0.236503	0.207901	0.249785
232.19	725	1225	1246	1202	0.09	0.9167	0.387426	0.36683	0.440755	0.212952	0.187185	0.224908
232.28	724	1226	1247	1203	0.09	0.9167	0.387236	0.366694	0.440619	0.213056	0.187243	0.224991
232.35	723	1227	1248	1204	0.07	0.9167	0.387097	0.36657	0.440531	0.16577	0.145663	0.175052
232.48	722	1228	1249	1205	0.13	0.9167	0.386863	0.366289	0.440303	0.308044	0.270657	0.325347
232.6	721	1229	1250	1206	0.12	0.9167	0.386657	0.36602	0.440076	0.2845	0.249966	0.300541
232.69	720	1230	1251	1207	0.09	0.9167	0.386508	0.365845	0.439972	0.213458	0.187519	0.225513
232.85	719	1231	1252	1208	0.16	0.9167	0.386237	0.365593	0.439743	0.379746	0.33354	0.401189
232.97	718	1232	1254	1209	0.12	0.9167	0.386034	0.365391	0.439576	0.284959	0.25025	0.301058
233.07	717	1233	1255	1210	0.1	0.9167	0.385882	0.365191	0.439437	0.237559	0.208608	0.251019
233.16	716	1234	1256	1211	0.09	0.9167	0.385739	0.36504	0.439314	0.213883	0.1878	0.226011
233.28	715	1235	1257	1212	0.12	0.9167	0.385547	0.364857	0.439139	0.285319	0.2505	0.301499
233.37	714	1236	1258	1213	0.09	0.9167	0.38541	0.364707	0.438999	0.214065	0.187935	0.226218
233.5	713	1237	1259	1214	0.13	0.9167	0.385219	0.364451	0.438777	0.309359	0.271598	0.326988
233.62	712	1238	1260	1215	0.12	0.9167	0.385021	0.36423	0.438541	0.285709	0.250841	0.302018
233.75	711	1239	1261	1216	0.13	0.9167	0.38481	0.364027	0.438328	0.309688	0.271876	0.327368
233.85	710	1240	1262	1217	0.1	0.9167	0.384615	0.363862	0.438172	0.238342	0.20921	0.251936
233.95	709	1241	1263	1218	0.1	0.9167	0.384424	0.363702	0.438014	0.238461	0.209286	0.252047
234.1	708	1242	1264	1219	0.15	0.9167	0.384145	0.363489	0.437715	0.357951	0.314142	0.378292
234.26	707	1243	1265	1221	0.16	0.9167	0.383875	0.363247	0.437362	0.382083	0.335356	0.40378
234.35	706	1244	1266	1221	0.09	0.9167	0.383748	0.36309	0.437189	0.214993	0.188713	0.227225
234.44	705	1245	1267	1222	0.09	0.9167	0.383574	0.362949	0.437012	0.21509	0.188789	0.227313
234.51	704	1246	1268	1223	0.07	0.9167	0.383426	0.362844	0.436909	0.167357	0.14687	0.17685
234.6	703	1247	1269	1224	0.09	0.9167	0.383238	0.362702	0.436798	0.215279	0.188881	0.227468
234.66	702	1248	1270	1225	0.06	0.9167	0.383118	0.362602	0.43673	0.143564	0.125941	0.151687
234.82	701	1249	1271	1226	0.16	0.9167	0.382837	0.362353	0.436568	0.383118	0.335966	0.404777
234.95	700	1250	1272	1227	0.13	0.9167	0.382645	0.36215	0.43644	0.31144	0.273052	0.329066
235.07	699	1251	1273	1228	0.12	0.9167	0.382433	0.361924	0.436271	0.287643	0.252146	0.303943
235.16	698	1252	1274	1229	0.09	0.9167	0.382233	0.361715	0.436112	0.215845	0.189178	0.228089
235.23	697	1253	1275	1230	0.07	0.9167	0.382066	0.361559	0.436036	0.167953	0.147164	0.177479
235.37	696	1254	1276	1231	0.14	0.9167	0.381796	0.361292	0.435846	0.336143	0.294457	0.355219
235.54	695	1255	1277	1232	0.17	0.9167	0.381498	0.361052	0.435601	0.408492	0.357757	0.431625
235.67	694	1256	1278	1233	0.13	0.9167	0.381288	0.36084	0.435447	0.312548	0.273675	0.33026
235.79	693	1257	1279	1234	0.12	0.9167	0.381099	0.360601	0.4353	0.288649	0.252709	0.305057
235.92	692	1258	1280	1235	0.13	0.9167	0.38091	0.360384	0.435159	0.312858	0.273856	0.330677
236.07	691	1259	1281	1236	0.15	0.9167	0.380648	0.360143	0.434986	0.36124	0.316113	0.381806
236.2	690	1260	1283	1238	0.13	0.9167	0.380394	0.359953	0.434819	0.313283	0.274071	0.331074
236.32	689	1261	1284	1239	0.12	0.9167	0.380189	0.35979	0.434622	0.289341	0.253103	0.305745
236.44	688	1262	1285	1240	0.12	0.9167	0.380017	0.359553	0.434461	0.289471	0.253197	0.305946
236.54	687	1263	1286	1241	0.1	0.9167	0.379846	0.359366	0.434341	0.241334	0.211055	0.255088
236.63	686	1264	1287	1242	0.09	0.9167	0.379674	0.359231	0.434227	0.217299	0.19	0.229666
236.7	685	1265	1287	1242	0.07	0.9167	0.379525	0.359131	0.434133	0.169077	0.14781	0.178679
236.76	684	1266	1288	1243	0.06	0.9167	0.379419	0.359031	0.434051	0.144964	0.126718	0.153196
236.94	683	1267	1289	1244	0.18	0.9167	0.379154	0.358744	0.433853	0.435196	0.380327	0.459955
237.04	682	1268	1291	1245	0.1	0.9167	0.379004	0.358576	0.433746	0.241871	0.211345	0.25565
237.16	681	1269	1291	1246	0.12	0.9167	0.378787	0.358366	0.433603	0.290412	0.253698	0.30696
237.26	680	1270	1292	1247	0.1	0.9167	0.37859	0.358231	0.433445	0.242135	0.211492	0.255896
237.34	679	1271	1293	1248	0.08	0.9167	0.378428	0.358118	0.433295	0.193791	0.169252	0.204782
237.44	678	1272	1294	1249	0.1	0.9167	0.378238	0.35798	0.433166	0.24236	0.211628	0.256076
237.59	677	1273	1295	1250	0.15	0.9167	0.377979	0.357722	0.432971	0.36379	0.317585	0.384391
237.72	676	1274	1296	1251	0.13	0.9167	0.377732	0.357535	0.43279	0.315491	0.275356	0.333313
237.81	675	1275	1297	1252	0.09	0.9167	0.377589	0.357395	0.432658	0.2185	0.190689	0.230846
237.91	674	1276	1298	1253	0.1	0.9167	0.377445	0.357233	0.432544	0.24287	0.211932	0.256611
238.1	673	1277	1300	1254	0.19	0.9167	0.377095	0.3569	0.432229	0.461881	0.402965	0.488017
238.2	672	1278	1301	1255	0.1	0.9167	0.376919	0.3567	0.432037	0.243209	0.212181	0.256995
238.34	671	1279	1302	1256	0.14	0.9167	0.376652	0.356434	0.431758	0.340734	0.297245	0.360061
238.44	670	1280	1303	1257	0.1	0.9167	0.376497	0.356269	0.431591	0.243481	0.2124	0.257305
238.6	669	1281	1304	1259	0.16	0.9167	0.376265	0.356026	0.431419	0.38981	0.339976	0.41197
238.79	668	1282	1305	1260	0.19	0.9167	0.375989	0.355764	0.431211	0.46324	0.403916	0.489575
238.88	667	1283	1306	1261	0.09	0.9167	0.37585	0.355627	0.431097	0.21951	0.191379	0.231993
238.98	666	1284	1307	1262	0.1	0.9167	0.375677	0.35546	0.430953	0.244013	0.212715	0.257891
239.09	665	1285	1308	1263	0.11	0.9167	0.37547	0.355288	0.430793	0.268562	0.234073	0.283818
239.26	664	1286	1309	1264	0.17	0.9167	0.375175	0.354886	0.430539	0.415376	0.361962	0.439124
239.34	663	1287	1310	1265	0.08	0.9167	0.375043	0.354727	0.430448	0.19554	0.170371	0.206739
239.47	662	1288	1311	1266	0.13	0.9167	0.374865	0.354523	0.430267	0.317904	0.27697	0.336144
239.57	661	1289	1312	1267	0.1	0.9167	0.374713	0.354367	0.430031	0.24464	0.213171	0.258686
239.67	660	1290	1313	1268	0.1	0.9167	0.374557	0.354246	0.429921	0.244743	0.213225	0.258775
239.76	659	1291	1314	1268	0.09	0.9167	0.374412	0.354152	0.429757	0.220354	0.191976	0.232959
239.89	658	1292	1315	1269	0.13	0.9167	0.37419	0.353975	0.429569	0.318477	0.27742	0.336665
239.98	657	1293	1316	1270	0.09	0.9167	0.374033	0.353834	0.429497	0.220577	0.192092	0.233169
240.055	656	1294	1317	1271	0.075	0.9167	0.373883	0.353709	0.429374	0.183888	0.160123	0.194376
240.17	655	1295	1319	1272	0.115	0.9167	0.373655	0.35355	0.429181	0.282133	0.245632	0.298177
240.265	654	1296	1320	1273	0.095	0.9167	0.373415	0.353423	0.429037	0.233217	0.202981	0.246409
240.365	653	1297	1321	1274	0.1	0.9167	0.373196	0.353277	0.428896	0.245635	0.213735	0.259484
240.485	652	1298	1322	1275	0.12	0.9167	0.37302	0.353109	0.428674	0.294901	0.256614	0.311529
240.535	651	1299	1323	1275	0.05	0.9167	0.37295	0.353023	0.428555	0.122899	0.106952	0.129836
240.635	650	1300	1324	1276	0.1	0.9167	0.372799	0.352874	0.428424	0.245897	0.21397	0.259781
240.71	649	1301	1325	1277	0.075	0.9167	0.372674	0.352748	0.428373	0.184484	0.160497	0.194905
240.815	648	1302	1326	1278	0.105	0.9167	0.372456	0.352561	0.428223	0.258429	0.224774	0.273012
240.89	647	1303	1327	1279	0.075	0.9167	0.372292	0.352439	0.428112	0.184674	0.160594	0.195076
240.97	646	1304	1328	1280	0.08	0.9167	0.372131	0.352309	0.428003	0.19707	0.171345	0.208158
241.06	645	1305	1329	1281	0.09	0.9167	0.371979	0.352151	0.427821	0.221795	0.192844	0.234283
241.22	644	1306	1331	1282	0.16	0.9167	0.371748	0.351894	0.427591	0.394547	0.34302	0.416807
241.34	643	1307	1332	1283	0.12	0.9167	0.371557	0.351742	0.427378	0.296062	0.257393	0.31274
241.405	642	1308	1333	1284	0.065	0.9167	0.371466	0.351652	0.42727	0.160407	0.139456	0.169445
241.505	641	1309	1334	1285	0.1	0.9167	0.371303	0.35149	0.42713	0.246887	0.214618	0.260804
241.655	640	1310	1336	1286	0.15	0.9167	0.371096	0.351303	0.4269	0.370537	0.322101	0.391414
241.73	639	1311	1337	1287	0.075	0.9167	0.370988	0.351127	0.426775	0.185323	0.161098	0.195805
241.81	638	1312	1338	1287	0.08	0.9167	0.370854	0.350919	0.426644	0.197749	0.17189	0.208983
241.895	637	1313	1339	1288	0.085	0.9167	0.37071	0.350696	0.426516	0.21019	0.182688	0.222185
241.985	636	1314	1340	1289	0.09	0.9167	0.370562	0.350471	0.426427	0.222643	0.193475	0.235406
242.075	635	1315	1341	1290	0.09	0.9167	0.370428	0.350276	0.426295	0.222724	0.193535	0.235537
242.165	634	1316	1342	1291	0.09	0.9167	0.370285	0.350122	0.426149	0.222809	0.193601	0.235641
242.255	633	1317	1343	1292	0.09	0.9167	0.370142	0.349986	0.426021	0.222896	0.193659	0.235732
242.35	632	1318	1344	1293	0.095	0.9167	0.369999	0.349838	0.425907	0.23537	0.204473	0.248934
242.48	631	1319	1345	1294	0.13	0.9167	0.369774	0.349619	0.425745	0.32228	0.279912	0.34086
242.615	630	1320	1346	1295	0.135	0.9167	0.369562	0.349416	0.425534	0.334868	0.290822	0.354175
242.705	629	1321	1347	1296	0.09	0.9167	0.369418	0.349269	0.425387	0.223333	0.193948	0.236216
242.795	628	1322	1348	1297	0.09	0.9167	0.369264	0.349084	0.425225	0.223425	0.194022	0.236341
242.9	627	1323	1349	1298	0.105	0.9167	0.369082	0.348867	0.425041	0.260792	0.226457	0.275903
243.035	626	1324	1350	1300	0.135	0.9167	0.368816	0.348643	0.424864	0.335545	0.291281	0.354961
243.2	625	1325	1351	1301	0.165	0.9167	0.368484	0.348394	0.42455	0.410481	0.356272	0.43415
243.305	624	1326	1353	1302	0.105	0.9167	0.368297	0.348239	0.424322	0.261348	0.226841	0.276401
243.44	623	1327	1354	1303	0.135	0.9167	0.36802	0.348059	0.424067	0.336271	0.291828	0.355556
243.545	622	1328	1355	1304	0.105	0.9167	0.367805	0.347912	0.423914	0.261697	0.227059	0.27666
243.625	621	1329	1356	1305	0.08	0.9167	0.367654	0.347811	0.423811	0.19947	0.173039	0.21085
243.68	620	1330	1357	1306	0.055	0.9167	0.367563	0.34773	0.423744	0.13717	0.118983	0.144993
243.73	619	1331	1358	1307	0.05	0.9167	0.367484	0.347646	0.423662	0.124727	0.108188	0.131844
243.79	618	1332	1359	1307	0.06	0.9167	0.36739	0.347548	0.423556	0.14971	0.129858	0.158257
243.88	617	1333	1360	1308	0.09	0.9167	0.367266	0.347415	0.423384	0.224641	0.194866	0.237477
243.995	616	1334	1361	1309	0.115	0.9167	0.367092	0.347233	0.423216	0.287177	0.249094	0.303602
244.055	615	1335	1361	1310	0.06	0.9167	0.366993	0.347133	0.423136	0.149872	0.129986	0.158446
244.145	614	1336	1362	1311	0.09	0.9167	0.366869	0.346964	0.423008	0.224884	0.195039	0.237786
244.24	613	1337	1363	1312	0.095	0.9167	0.366739	0.346754	0.422858	0.237462	0.205947	0.251147
244.315	612	1338	1364	1313	0.075	0.9167	0.366629	0.346591	0.422744	0.187526	0.162634	0.198368
244.385	611	1339	1365	1313	0.07	0.9167	0.36652	0.346454	0.422599	0.175076	0.151844	0.185217
244.465	610	1340	1366	1314	0.08	0.9167	0.366392	0.34633	0.422464	0.200157	0.173591	0.211752
244.535	609	1341	1367	1315	0.07	0.9167	0.366289	0.346216	0.422377	0.175187	0.151923	0.185344
244.6	608	1342	1368	1316	0.065	0.9167	0.366194	0.34611	0.422276	0.162716	0.141106	0.172158
244.66	607	1343	1369	1317	0.06	0.9167	0.366105	0.346003	0.422183	0.150236	0.13028	0.158964
244.765	606	1344	1370	1318	0.105	0.9167	0.365944	0.345797	0.422025	0.263028	0.228075	0.278353
244.87	605	1345	1371	1319	0.105	0.9167	0.36578	0.345639	0.421877	0.263146	0.228155	0.27848
244.945	604	1346	1372	1320	0.075	0.9167	0.365671	0.34553	0.42179	0.188017	0.163002	0.198977
245.015	603	1347	1373	1321	0.07	0.9167	0.365573	0.345416	0.421708	0.17553	0.152164	0.185773
245.09	602	1348	1374	1322	0.075	0.9167	0.365446	0.345306	0.421606	0.188133	0.163073	0.199106
245.17	601	1349	1375	1323	0.08	0.9167	0.36532	0.345193	0.421485	0.200744	0.173994	0.212449
245.245	600	1350	1376	1324	0.075	0.9167	0.365198	0.345084	0.42138	0.188261	0.163161	0.199234
245.305	599	1351	1377	1325	0.06	0.9167	0.365104	0.345001	0.421286	0.150647	0.130557	0.159426
245.375	598	1352	1378	1326	0.07	0.9167	0.365016	0.344901	0.42118	0.175798	0.152355	0.18605
245.45	597	1353	1379	1327	0.075	0.9167	0.36491	0.344778	0.421107	0.18841	0.163266	0.199411
245.575	596	1354	1380	1328	0.125	0.9167	0.364707	0.344548	0.420897	0.31419	0.272246	0.332573
245.665	595	1355	1382	1329	0.09	0.9167	0.364565	0.344393	0.420771	0.226305	0.196076	0.239561
245.75	594	1356	1383	1330	0.085	0.9167	0.364394	0.344241	0.420655	0.213833	0.185234	0.226352
245.81	593	1357	1384	1331	0.06	0.9167	0.364275	0.344141	0.420572	0.15099	0.130779	0.159824
245.92	592	1358	1385	1332	0.11	0.9167	0.364068	0.344008	0.42042	0.276973	0.239848	0.293124
245.99	591	1359	1386	1333	0.07	0.9167	0.363941	0.343921	0.420324	0.176317	0.152666	0.186581
246.055	590	1360	1386	1333	0.065	0.9167	0.363827	0.343804	0.420226	0.163774	0.141794	0.173313
246.185	589	1361	1388	1334	0.13	0.9167	0.363612	0.343575	0.419918	0.327742	0.283796	0.346856
246.31	588	1362	1389	1335	0.125	0.9167	0.363388	0.343384	0.419696	0.315331	0.273025	0.333701
246.43	587	1363	1390	1336	0.12	0.9167	0.363211	0.343197	0.419453	0.302865	0.262256	0.320527
246.565	586	1364	1391	1338	0.135	0.9167	0.363024	0.343015	0.419308	0.340899	0.29514	0.360785
246.625	585	1365	1392	1339	0.06	0.9167	0.362939	0.342939	0.41925	0.151546	0.131192	0.160384
246.695	584	1366	1393	1340	0.07	0.9167	0.362841	0.342845	0.419128	0.176852	0.153101	0.187166
246.755	583	1367	1394	1340	0.06	0.9167	0.362756	0.342766	0.419041	0.151622	0.131257	0.160465
246.815	582	1368	1395	1341	0.06	0.9167	0.362671	0.342684	0.41896	0.151658	0.131282	0.160504
246.91	581	1369	1396	1342	0.095	0.9167	0.36254	0.34255	0.418759	0.240212	0.207963	0.25423
247	580	1370	1397	1343	0.09	0.9167	0.362416	0.342419	0.418622	0.227647	0.197082	0.240942
247.1	579	1371	1398	1344	0.1	0.9167	0.362253	0.342286	0.418504	0.253055	0.219042	0.267817
247.19	578	1372	1399	1345	0.09	0.9167	0.362097	0.342166	0.418353	0.227848	0.197209	0.24112
247.255	577	1373	1400	1346	0.065	0.9167	0.361992	0.342071	0.41825	0.164605	0.142464	0.17419
247.345	576	1374	1401	1347	0.09	0.9167	0.36183	0.341936	0.418163	0.228016	0.197299	0.241282
247.495	575	1375	1402	1348	0.15	0.9167	0.361569	0.341704	0.417982	0.380301	0.328973	0.40241
247.565	574	1376	1403	1349	0.07	0.9167	0.361437	0.341572	0.417871	0.177538	0.153562	0.187864
247.685	573	1377	1404	1350	0.12	0.9167	0.361226	0.341377	0.417621	0.30453	0.263406	0.322237
247.76	572	1378	1406	1351	0.075	0.9167	0.361108	0.341236	0.417512	0.190393	0.164672	0.201481
247.81	571	1379	1406	1352	0.05	0.9167	0.361035	0.341138	0.417447	0.126955	0.109798	0.134359
247.93	570	1380	1407	1353	0.12	0.9167	0.360863	0.340956	0.417278	0.304836	0.263623	0.322634
248.03	569	1381	1409	1354	0.1	0.9167	0.360711	0.340822	0.417145	0.254137	0.219756	0.268968
248.135	568	1382	1410	1355	0.105	0.9167	0.360523	0.340633	0.417004	0.266983	0.230822	0.282572
248.2	567	1383	1411	1356	0.065	0.9167	0.360403	0.340524	0.416913	0.16533	0.142921	0.174982
248.36	566	1384	1412	1357	0.16	0.9167	0.360133	0.340297	0.41666	0.407272	0.352019	0.431012
248.435	565	1385	1413	1358	0.075	0.9167	0.360031	0.34015	0.41654	0.190963	0.165056	0.202124
248.48	564	1386	1413	1358	0.045	0.9167	0.359974	0.340073	0.416476	0.114596	0.099049	0.121302
248.59	563	1387	1414	1359	0.11	0.9167	0.359831	0.339888	0.416358	0.280234	0.242188	0.296677
248.665	562	1388	1415	1360	0.075	0.9167	0.359724	0.339743	0.416256	0.191125	0.165169	0.202366
248.795	561	1389	1416	1361	0.13	0.9167	0.359527	0.339529	0.416096	0.331466	0.286402	0.350989
248.87	560	1390	1418	1363	0.075	0.9167	0.359412	0.339438	0.415954	0.191292	0.165289	0.202548
248.98	559	1391	1419	1364	0.11	0.9167	0.35924	0.3393	0.41583	0.280695	0.242496	0.297191
249.085	558	1392	1420	1365	0.105	0.9167	0.359057	0.339093	0.415679	0.268073	0.231557	0.283856
249.185	557	1393	1421	1366	0.1	0.9167	0.358896	0.338832	0.415555	0.255422	0.220596	0.270547
249.265	556	1394	1422	1367	0.08	0.9167	0.358763	0.338632	0.415443	0.204413	0.176525	0.216565
249.38	555	1395	1423	1368	0.115	0.9167	0.358603	0.338459	0.415254	0.293976	0.25387	0.311472
249.475	554	1396	1424	1369	0.095	0.9167	0.358484	0.338345	0.415093	0.24293	0.2098	0.25739
249.56	553	1397	1425	1370	0.085	0.9167	0.358343	0.338233	0.414932	0.217444	0.187789	0.230372
249.625	552	1398	1426	1370	0.065	0.9167	0.358245	0.338147	0.414813	0.166326	0.143644	0.176212
249.73	551	1399	1427	1371	0.105	0.9167	0.3581	0.337975	0.414638	0.268789	0.232139	0.284795
249.83	550	1400	1428	1372	0.1	0.9167	0.357941	0.337786	0.414478	0.256104	0.22117	0.271385
249.905	549	1401	1429	1373	0.075	0.9167	0.357798	0.337663	0.414375	0.192154	0.165919	0.203613
249.965	548	1402	1430	1374	0.06	0.9167	0.357698	0.337562	0.414294	0.153767	0.132761	0.162939
250.06	547	1403	1431	1375	0.095	0.9167	0.35754	0.337392	0.414183	0.243571	0.210261	0.258116
250.165	546	1404	1432	1376	0.105	0.9167	0.357352	0.337244	0.414051	0.269352	0.232468	0.285412
250.27	545	1405	1433	1377	0.105	0.9167	0.357185	0.337108	0.413914	0.269478	0.232545	0.285527
250.385	544	1406	1434	1378	0.115	0.9167	0.356995	0.336949	0.413755	0.295299	0.25479	0.312868
250.48	543	1407	1435	1379	0.095	0.9167	0.356792	0.336794	0.413615	0.244082	0.21055	0.258575
250.555	542	1408	1436	1380	0.075	0.9167	0.35663	0.336687	0.413509	0.192784	0.166266	0.204203
250.69	541	1409	1437	1381	0.135	0.9167	0.356367	0.336472	0.413219	0.347267	0.299489	0.3678
250.825	540	1410	1438	1383	0.135	0.9167	0.356166	0.336264	0.412932	0.347463	0.299697	0.368027
250.955	539	1411	1439	1384	0.13	0.9167	0.355971	0.336053	0.412751	0.334777	0.288724	0.354619
251.06	538	1412	1440	1385	0.105	0.9167	0.355828	0.335869	0.412608	0.270506	0.233281	0.286581
251.14	537	1413	1441	1386	0.08	0.9167	0.355715	0.335729	0.412509	0.206165	0.17778	0.218438
251.215	536	1414	1442	1387	0.075	0.9167	0.355581	0.335601	0.412432	0.193353	0.1667	0.204864
251.33	535	1415	1443	1388	0.115	0.9167	0.355376	0.335399	0.412337	0.296645	0.255666	0.314314
251.455	534	1416	1444	1389	0.125	0.9167	0.355198	0.33516	0.412178	0.322602	0.278005	0.341889
251.53	533	1417	1446	1390	0.075	0.9167	0.355075	0.335033	0.41206	0.193628	0.166851	0.205211
251.615	532	1418	1446	1390	0.085	0.9167	0.354925	0.334916	0.411931	0.219538	0.189157	0.232654
251.71	531	1419	1447	1391	0.095	0.9167	0.354766	0.334729	0.411821	0.245476	0.211467	0.26017
251.815	530	1420	1448	1392	0.105	0.9167	0.3546	0.334524	0.411714	0.271442	0.233787	0.287733
251.95	529	1421	1449	1393	0.135	0.9167	0.354387	0.334277	0.411525	0.349207	0.300722	0.370216
252.02	528	1422	1450	1394	0.07	0.9167	0.354279	0.334149	0.411449	0.181126	0.155959	0.192037
252.115	527	1423	1451	1395	0.095	0.9167	0.354124	0.334011	0.411309	0.245921	0.21173	0.260729
252.205	526	1424	1452	1396	0.09	0.9167	0.353991	0.333891	0.411183	0.233066	0.200648	0.247095
252.305	525	1425	1453	1397	0.1	0.9167	0.353835	0.333732	0.411069	0.259075	0.223004	0.274682
252.38	524	1426	1454	1398	0.075	0.9167	0.353712	0.333604	0.410954	0.194374	0.1673	0.20609
252.445	523	1427	1455	1399	0.065	0.9167	0.353627	0.333484	0.410817	0.168498	0.145042	0.178676
252.535	522	1428	1456	1400	0.09	0.9167	0.353503	0.333305	0.41072	0.233387	0.200874	0.24753
252.62	521	1429	1457	1401	0.085	0.9167	0.353359	0.333143	0.410564	0.220511	0.189787	0.233892
252.725	520	1430	1458	1402	0.105	0.9167	0.353171	0.332957	0.410413	0.272541	0.234528	0.289087
252.785	519	1431	1459	1403	0.06	0.9167	0.353071	0.332852	0.410325	0.155782	0.134045	0.165245
252.895	518	1432	1460	1404	0.11	0.9167	0.352892	0.332673	0.410156	0.285744	0.24585	0.303111
252.98	517	1433	1461	1405	0.085	0.9167	0.352754	0.332519	0.410049	0.220889	0.190025	0.234331
253.06	516	1434	1462	1406	0.08	0.9167	0.352627	0.332381	0.409962	0.207971	0.178885	0.220639
253.15	515	1435	1463	1406	0.09	0.9167	0.352466	0.332233	0.409852	0.234073	0.2013	0.248329
253.24	514	1436	1464	1407	0.09	0.9167	0.352295	0.332116	0.409719	0.234187	0.201365	0.248416
253.33	513	1437	1465	1408	0.09	0.9167	0.352144	0.331941	0.409618	0.234288	0.201414	0.248547
253.505	512	1438	1467	1410	0.175	0.9167	0.351847	0.33158	0.409344	0.455944	0.391901	0.483812
253.61	511	1439	1468	1411	0.105	0.9167	0.351699	0.331318	0.409066	0.273682	0.235301	0.290517
253.745	510	1440	1469	1412	0.135	0.9167	0.351516	0.33097	0.408741	0.352059	0.30277	0.373914
253.81	509	1441	1470	1413	0.065	0.9167	0.351415	0.330843	0.408601	0.169559	0.145828	0.180102
253.87	508	1442	1470	1413	0.06	0.9167	0.351312	0.330746	0.408482	0.156562	0.13465	0.166297
253.97	507	1443	1471	1414	0.1	0.9167	0.351124	0.330613	0.408314	0.261076	0.224509	0.277273
254.065	506	1444	1472	1415	0.095	0.9167	0.350949	0.330492	0.408202	0.248146	0.213342	0.263506
254.195	505	1445	1473	1416	0.13	0.9167	0.350728	0.330268	0.408	0.339782	0.292086	0.360831
254.285	504	1446	1474	1417	0.09	0.9167	0.35059	0.330121	0.407894	0.235326	0.202266	0.249917
254.35	503	1447	1475	1418	0.065	0.9167	0.350493	0.330038	0.407788	0.170005	0.146119	0.180541
254.465	502	1448	1477	1420	0.115	0.9167	0.350297	0.329865	0.407632	0.300946	0.258617	0.319587
254.525	501	1449	1478	1421	0.06	0.9167	0.350193	0.329756	0.407557	0.157062	0.134955	0.166796
254.6	500	1450	1479	1421	0.075	0.9167	0.350075	0.329637	0.407439	0.196393	0.168743	0.20857
254.675	499	1451	1480	1422	0.075	0.9167	0.349969	0.329535	0.40729	0.196453	0.168805	0.208635
254.825	498	1452	1481	1423	0.15	0.9167	0.349725	0.329294	0.406994	0.393181	0.337855	0.417575
254.915	497	1453	1482	1424	0.09	0.9167	0.349553	0.329143	0.406862	0.236024	0.202779	0.25066
254.995	496	1454	1483	1425	0.08	0.9167	0.349409	0.32904	0.40675	0.209886	0.180297	0.222879
255.07	495	1455	1484	1426	0.075	0.9167	0.349283	0.328947	0.406632	0.196839	0.169078	0.209008
255.16	494	1456	1485	1427	0.09	0.9167	0.349148	0.328815	0.406535	0.236298	0.202942	0.25091
255.25	493	1457	1486	1428	0.09	0.9167	0.349007	0.328673	0.406429	0.236394	0.202995	0.251018
255.335	492	1458	1487	1429	0.085	0.9167	0.34887	0.328538	0.406331	0.223348	0.191763	0.23717
255.44	491	1459	1488	1430	0.105	0.9167	0.348696	0.328378	0.406166	0.276038	0.236981	0.293118
255.53	490	1460	1489	1431	0.09	0.9167	0.348554	0.328219	0.406075	0.236701	0.203172	0.251365
255.595	489	1461	1490	1432	0.065	0.9167	0.348448	0.328092	0.40601	0.171002	0.146759	0.181612
255.68	488	1462	1491	1433	0.085	0.9167	0.348304	0.327925	0.405893	0.223711	0.191971	0.237614
255.745	487	1463	1492	1434	0.065	0.9167	0.348189	0.327799	0.405802	0.17113	0.146834	0.181775
255.865	486	1464	1493	1435	0.12	0.9167	0.347973	0.327565	0.405652	0.316128	0.271178	0.335823
255.92	485	1465	1494	1436	0.055	0.9167	0.347884	0.327464	0.405564	0.144929	0.124317	0.153966
256.015	484	1466	1495	1437	0.095	0.9167	0.347752	0.327305	0.405434	0.250427	0.214798	0.266071
256.09	483	1467	1496	1438	0.075	0.9167	0.347639	0.327194	0.405326	0.19777	0.169623	0.210128
256.175	482	1468	1497	1439	0.085	0.9167	0.347519	0.327061	0.405154	0.224216	0.192321	0.238241
256.28	481	1469	1498	1440	0.105	0.9167	0.347356	0.326862	0.404964	0.277104	0.237684	0.294477
256.39	480	1470	1499	1441	0.11	0.9167	0.347204	0.326654	0.404731	0.290426	0.249145	0.308697
256.51	479	1471	1500	1442	0.12	0.9167	0.347015	0.326454	0.404545	0.317	0.27192	0.336967
256.615	478	1472	1501	1443	0.105	0.9167	0.346821	0.326277	0.404407	0.277531	0.238012	0.295006
256.72	477	1473	1502	1445	0.105	0.9167	0.346629	0.326042	0.404232	0.277685	0.238114	0.295218
256.795	476	1474	1503	1446	0.075	0.9167	0.34652	0.325881	0.404093	0.198408	0.17014	0.210975
256.88	475	1475	1504	1446	0.085	0.9167	0.346403	0.325721	0.403951	0.224939	0.192894	0.239222
256.94	474	1476	1505	1447	0.06	0.9167	0.346325	0.32562	0.403864	0.158816	0.136189	0.168915
257.03	473	1477	1506	1448	0.09	0.9167	0.346207	0.325474	0.403754	0.238305	0.20434	0.253486
257.105	472	1478	1507	1449	0.075	0.9167	0.346088	0.325343	0.40365	0.198656	0.170327	0.211323
257.195	471	1479	1508	1450	0.09	0.9167	0.345919	0.325177	0.403523	0.238504	0.204457	0.253717
257.285	470	1480	1509	1451	0.09	0.9167	0.345749	0.325026	0.40341	0.238621	0.204514	0.253835
257.375	469	1481	1510	1452	0.09	0.9167	0.345574	0.324884	0.403288	0.238742	0.204576	0.253946
257.555	468	1482	1511	1453	0.18	0.9167	0.345244	0.324574	0.40308	0.47794	0.409363	0.508377
257.675	467	1483	1512	1454	0.12	0.9167	0.345056	0.324315	0.402877	0.3188	0.273046	0.339189
257.755	466	1484	1513	1455	0.08	0.9167	0.344937	0.32417	0.402717	0.212607	0.182103	0.226227
257.83	465	1485	1514	1456	0.075	0.9167	0.344819	0.324061	0.402644	0.199387	0.170753	0.212159
257.92	464	1486	1515	1457	0.09	0.9167	0.344668	0.323957	0.402477	0.239369	0.204988	0.254673
257.975	463	1487	1516	1458	0.055	0.9167	0.344568	0.323884	0.402371	0.146324	0.125303	0.155668
258.025	462	1488	1517	1458	0.05	0.9167	0.344466	0.323821	0.402299	0.133061	0.113933	0.141544
258.095	461	1489	1518	1459	0.07	0.9167	0.344345	0.323734	0.402222	0.186351	0.159536	0.198215
258.185	460	1490	1519	1460	0.09	0.9167	0.344199	0.32362	0.402137	0.239696	0.205161	0.254938
258.28	459	1491	1520	1462	0.095	0.9167	0.34403	0.323493	0.40201	0.253136	0.216627	0.269206
258.35	458	1492	1521	1463	0.07	0.9167	0.343893	0.323399	0.401881	0.186596	0.159672	0.198421
258.41	457	1493	1522	1464	0.06	0.9167	0.34377	0.323308	0.40179	0.159997	0.136892	0.170123
258.5	456	1494	1523	1465	0.09	0.9167	0.343588	0.323167	0.401671	0.240122	0.205399	0.255296
258.56	455	1495	1524	1466	0.06	0.9167	0.343473	0.323081	0.401596	0.160135	0.136958	0.170242
258.655	454	1496	1525	1467	0.095	0.9167	0.343326	0.322941	0.401454	0.253655	0.216928	0.269667
258.74	453	1497	1526	1468	0.085	0.9167	0.3432	0.322799	0.40132	0.227038	0.194158	0.241387
258.805	452	1498	1527	1469	0.065	0.9167	0.3431	0.322685	0.401252	0.173668	0.148499	0.184655
258.935	451	1499	1528	1469	0.13	0.9167	0.342901	0.322471	0.401097	0.347538	0.297113	0.369555
258.995	450	1500	1529	1470	0.06	0.9167	0.342805	0.322366	0.401024	0.160447	0.137154	0.17062
259.12	449	1501	1530	1471	0.125	0.9167	0.34259	0.322163	0.400884	0.334474	0.285837	0.355682
259.19	448	1502	1531	1472	0.07	0.9167	0.34247	0.322051	0.4008	0.187371	0.160102	0.199251
259.3	447	1503	1532	1473	0.11	0.9167	0.34228	0.321891	0.40066	0.294604	0.251677	0.313265
259.375	446	1504	1533	1474	0.075	0.9167	0.342124	0.321768	0.40057	0.200958	0.171637	0.213671
259.435	445	1505	1534	1475	0.06	0.9167	0.342021	0.321664	0.400503	0.160815	0.137332	0.170992
259.51	444	1506	1535	1476	0.075	0.9167	0.341906	0.321556	0.400416	0.201086	0.171703	0.213812
259.595	443	1507	1536	1477	0.085	0.9167	0.341782	0.321407	0.400312	0.22798	0.194647	0.242433
259.66	442	1508	1537	1478	0.065	0.9167	0.341687	0.32131	0.400223	0.174386	0.148881	0.185446
259.73	441	1509	1538	1479	0.07	0.9167	0.341588	0.321219	0.400115	0.187855	0.160376	0.199767
259.925	440	1510	1539	1480	0.195	0.9167	0.341327	0.32098	0.399852	0.52371	0.447057	0.556908
260.06	439	1511	1541	1481	0.135	0.9167	0.341151	0.320788	0.399645	0.362755	0.309661	0.385782
260.225	438	1512	1542	1482	0.165	0.9167	0.340912	0.320551	0.399368	0.443679	0.378737	0.471861
260.35	437	1513	1543	1484	0.125	0.9167	0.340731	0.320389	0.399158	0.336299	0.287073	0.357651
260.45	436	1514	1544	1485	0.1	0.9167	0.340552	0.320221	0.399053	0.269181	0.229719	0.286271
260.525	435	1515	1545	1486	0.075	0.9167	0.340426	0.320115	0.398967	0.20196	0.172326	0.214774
260.62	434	1516	1546	1487	0.095	0.9167	0.340277	0.319992	0.398789	0.255928	0.218378	0.272152
260.695	433	1517	1547	1488	0.075	0.9167	0.340152	0.319889	0.398704	0.202123	0.17244	0.214926
260.795	432	1518	1548	1489	0.1	0.9167	0.33995	0.319756	0.398579	0.269657	0.229992	0.286687
260.87	431	1519	1549	1490	0.075	0.9167	0.339801	0.319635	0.398467	0.202331	0.172543	0.215097
260.945	430	1520	1550	1490	0.075	0.9167	0.339688	0.319499	0.398325	0.202399	0.172604	0.215188
261.08	429	1521	1551	1491	0.135	0.9167	0.339479	0.319282	0.398143	0.364542	0.310829	0.387602
261.215	428	1522	1552	1493	0.135	0.9167	0.339293	0.319075	0.397862	0.364742	0.311049	0.387854
261.305	427	1523	1553	1494	0.09	0.9167	0.33916	0.31897	0.397709	0.243257	0.207446	0.258654
261.385	426	1524	1554	1495	0.08	0.9167	0.339013	0.318864	0.397638	0.216322	0.184429	0.229992
261.47	425	1525	1555	1496	0.085	0.9167	0.338861	0.318738	0.39755	0.229945	0.195999	0.244462
261.55	424	1526	1556	1497	0.08	0.9167	0.338753	0.318614	0.397477	0.216488	0.184504	0.230172
261.62	423	1527	1557	1498	0.07	0.9167	0.338648	0.318504	0.397381	0.189486	0.16148	0.20147
261.685	422	1528	1558	1499	0.065	0.9167	0.338544	0.31841	0.397242	0.176005	0.149998	0.187134
261.785	421	1529	1559	1499	0.1	0.9167	0.338383	0.318268	0.39698	0.270906	0.230919	0.288027
261.835	420	1530	1560	1500	0.05	0.9167	0.338304	0.318176	0.396845	0.135484	0.115498	0.144055
261.91	419	1531	1561	1501	0.075	0.9167	0.338181	0.318034	0.396686	0.203301	0.173317	0.21618
262	418	1532	1562	1502	0.09	0.9167	0.338014	0.317891	0.396596	0.244082	0.208028	0.259532
262.075	417	1533	1563	1503	0.075	0.9167	0.337896	0.317775	0.396527	0.203472	0.173386	0.216356
262.165	416	1534	1564	1504	0.09	0.9167	0.337781	0.317642	0.396426	0.24425	0.208117	0.259735
262.24	415	1535	1565	1505	0.075	0.9167	0.337662	0.317532	0.396329	0.203613	0.173473	0.216522
262.37	414	1536	1566	1506	0.13	0.9167	0.337441	0.317329	0.396196	0.353161	0.300788	0.375544
262.48	413	1537	1567	1507	0.11	0.9167	0.337268	0.317182	0.395936	0.298982	0.25468	0.317916
262.615	412	1538	1568	1508	0.135	0.9167	0.337062	0.317048	0.39577	0.367157	0.312693	0.390334
262.715	411	1539	1569	1510	0.1	0.9167	0.336897	0.316886	0.395602	0.272101	0.231723	0.289284
262.805	410	1540	1570	1511	0.09	0.9167	0.336764	0.316725	0.395455	0.244988	0.208628	0.260488
262.88	409	1541	1571	1511	0.075	0.9167	0.336657	0.316619	0.395362	0.204222	0.173898	0.217146
263	408	1542	1572	1512	0.12	0.9167	0.336475	0.316449	0.395262	0.326931	0.278306	0.34762
263.11	407	1543	1573	1513	0.11	0.9167	0.33632	0.316276	0.395111	0.299825	0.255212	0.318826
263.195	406	1544	1574	1514	0.085	0.9167	0.336188	0.316116	0.394975	0.231774	0.197277	0.24649
263.26	405	1545	1575	1515	0.065	0.9167	0.33608	0.316006	0.394884	0.177295	0.150894	0.188558
263.36	404	1546	1576	1516	0.1	0.9167	0.33592	0.315881	0.394789	0.272892	0.2322	0.290204
263.425	403	1547	1577	1517	0.065	0.9167	0.335823	0.315796	0.394678	0.177431	0.150973	0.188684
263.51	402	1548	1578	1518	0.085	0.9167	0.335703	0.31569	0.394545	0.232108	0.197492	0.246823
263.59	401	1549	1579	1519	0.08	0.9167	0.335596	0.315589	0.394438	0.218525	0.185925	0.232379
263.65	400	1550	1580	1520	0.06	0.9167	0.335518	0.315489	0.394359	0.163932	0.139472	0.174339
263.755	399	1551	1581	1521	0.105	0.9167	0.335351	0.315336	0.394197	0.287023	0.244176	0.305241
263.87	398	1552	1582	1522	0.115	0.9167	0.335192	0.315197	0.394013	0.314508	0.267556	0.334459
263.935	397	1553	1583	1523	0.065	0.9167	0.335118	0.315125	0.393916	0.177804	0.151264	0.189086
264.07	396	1554	1584	1524	0.135	0.9167	0.334945	0.314954	0.3937	0.369477	0.314337	0.392929
264.145	395	1555	1586	1525	0.075	0.9167	0.334835	0.314849	0.393575	0.205332	0.174687	0.218367
264.205	394	1556	1587	1526	0.06	0.9167	0.33475	0.314764	0.393489	0.164308	0.13978	0.174741
264.265	393	1557	1588	1527	0.06	0.9167	0.334671	0.314684	0.393377	0.164347	0.13982	0.174785
264.385	392	1558	1589	1528	0.12	0.9167	0.334522	0.314511	0.393185	0.32884	0.279777	0.349762
264.475	391	1559	1590	1529	0.09	0.9167	0.334388	0.31437	0.393071	0.246728	0.209893	0.262439
264.545	390	1560	1591	1530	0.07	0.9167	0.33428	0.314256	0.392949	0.191962	0.163301	0.204193
264.635	389	1561	1592	1531	0.09	0.9167	0.334123	0.314111	0.392783	0.246924	0.210047	0.262655
264.725	388	1562	1593	1532	0.09	0.9167	0.333984	0.313992	0.392631	0.247027	0.210129	0.262755
264.79	387	1563	1594	1533	0.065	0.9167	0.3339	0.313922	0.392495	0.178453	0.151812	0.18981
264.86	386	1564	1595	1534	0.07	0.9167	0.333796	0.313828	0.392399	0.19224	0.16353	0.204472
264.935	385	1565	1596	1535	0.075	0.9167	0.333667	0.313735	0.392273	0.206051	0.175267	0.219142
264.995	384	1566	1597	1536	0.06	0.9167	0.333573	0.313666	0.392168	0.164887	0.140251	0.175352
265.07	383	1567	1598	1537	0.075	0.9167	0.333458	0.313572	0.392095	0.206181	0.175346	0.219256
265.145	382	1568	1598	1538	0.075	0.9167	0.333356	0.313471	0.392002	0.206243	0.175388	0.219327
265.21	381	1569	1600	1539	0.065	0.9167	0.333286	0.31339	0.39192	0.178782	0.152035	0.190132
265.28	380	1570	1601	1540	0.07	0.9167	0.333202	0.313309	0.391829	0.192583	0.163768	0.204811
265.355	379	1571	1601	1541	0.075	0.9167	0.333127	0.313228	0.391702	0.206385	0.175522	0.219496
265.45	378	1572	1602	1542	0.095	0.9167	0.333018	0.313115	0.391545	0.261507	0.222417	0.27813
265.525	377	1573	1603	1543	0.075	0.9167	0.332918	0.31301	0.391398	0.206515	0.175659	0.219649
265.61	376	1574	1604	1544	0.085	0.9167	0.332805	0.312866	0.391237	0.234129	0.199162	0.249051
265.705	375	1575	1606	1545	0.095	0.9167	0.332681	0.312743	0.391086	0.261772	0.222679	0.27846
265.795	374	1576	1607	1546	0.09	0.9167	0.332562	0.312619	0.390952	0.248083	0.211031	0.263909
265.91	373	1577	1608	1547	0.115	0.9167	0.332387	0.312458	0.390798	0.317162	0.269757	0.337391
266.015	372	1578	1609	1548	0.105	0.9167	0.332225	0.312324	0.390605	0.289723	0.246422	0.308185
266.08	371	1579	1610	1549	0.065	0.9167	0.332134	0.312251	0.390496	0.179402	0.152589	0.190826
266.14	370	1580	1611	1550	0.06	0.9167	0.332051	0.312155	0.390415	0.165643	0.140881	0.176201
266.26	369	1581	1612	1551	0.12	0.9167	0.331869	0.311942	0.390258	0.331468	0.281875	0.352643
266.33	368	1582	1613	1552	0.07	0.9167	0.331763	0.311853	0.390182	0.193418	0.164459	0.205767
266.405	367	1583	1614	1553	0.075	0.9167	0.331657	0.311787	0.390015	0.2073	0.176282	0.220511
266.5	366	1584	1615	1554	0.095	0.9167	0.331519	0.311646	0.389864	0.262689	0.223377	0.279441
266.63	365	1585	1616	1555	0.13	0.9167	0.331356	0.311441	0.389571	0.359646	0.305903	0.382644
266.68	364	1586	1617	1555	0.05	0.9167	0.331298	0.311371	0.389475	0.13835	0.117684	0.147204
266.825	363	1587	1618	1556	0.145	0.9167	0.331113	0.311112	0.389079	0.401438	0.341631	0.427247
266.92	362	1588	1619	1558	0.095	0.9167	0.330979	0.310967	0.388918	0.263118	0.22392	0.280051
266.98	361	1589	1620	1559	0.06	0.9167	0.330909	0.310892	0.38881	0.166215	0.141462	0.176917
267.04	360	1590	1621	1560	0.06	0.9167	0.330833	0.310824	0.388724	0.166253	0.141494	0.176956
267.1	359	1591	1622	1560	0.06	0.9167	0.330752	0.310749	0.388648	0.166294	0.141521	0.176998
267.235	358	1592	1623	1561	0.135	0.9167	0.330564	0.310538	0.388528	0.374374	0.318521	0.398516
267.395	357	1593	1624	1563	0.16	0.9167	0.330381	0.31035	0.388238	0.443949	0.377789	0.472601
267.56	356	1594	1626	1564	0.165	0.9167	0.330135	0.310138	0.388058	0.458163	0.389775	0.487704
267.62	355	1595	1627	1565	0.06	0.9167	0.330036	0.310047	0.387971	0.166655	0.141768	0.177399
267.665	354	1596	1628	1566	0.045	0.9167	0.329965	0.309968	0.387902	0.125018	0.106345	0.133083
267.74	353	1597	1628	1566	0.075	0.9167	0.329841	0.30985	0.387776	0.208441	0.177299	0.22189
267.805	352	1598	1629	1567	0.065	0.9167	0.329737	0.309758	0.387681	0.180706	0.153697	0.192362
267.875	351	1599	1630	1568	0.07	0.9167	0.329636	0.309655	0.387594	0.194666	0.165557	0.207227
268.025	350	1600	1631	1569	0.15	0.9167	0.329412	0.30944	0.387389	0.417426	0.354953	0.444367
268.09	349	1601	1632	1571	0.065	0.9167	0.329291	0.309348	0.387273	0.180951	0.153859	0.192616
268.18	348	1602	1633	1571	0.09	0.9167	0.329149	0.309219	0.38715	0.250656	0.213103	0.266811
268.28	347	1603	1634	1572	0.1	0.9167	0.329028	0.309089	0.38705	0.278609	0.236843	0.296581
268.37	346	1604	1635	1573	0.09	0.9167	0.32893	0.308972	0.386939	0.250822	0.21322	0.267024
268.42	345	1605	1636	1574	0.05	0.9167	0.328872	0.308889	0.386873	0.13937	0.118475	0.148387
268.48	344	1606	1636	1574	0.06	0.9167	0.328789	0.308808	0.386788	0.167287	0.142202	0.178111
268.58	343	1607	1637	1575	0.1	0.9167	0.328652	0.308688	0.386638	0.278927	0.237095	0.296966
268.66	342	1608	1638	1576	0.08	0.9167	0.328556	0.308588	0.386527	0.223207	0.189731	0.23765
268.72	341	1609	1639	1577	0.06	0.9167	0.328489	0.308518	0.386452	0.167439	0.142326	0.178278
268.82	340	1610	1640	1578	0.1	0.9167	0.328377	0.308389	0.386319	0.279161	0.237291	0.297254
268.915	339	1611	1641	1579	0.095	0.9167	0.328256	0.308261	0.386142	0.265301	0.22553	0.282509
268.99	338	1612	1642	1580	0.075	0.9167	0.328144	0.308178	0.385993	0.209519	0.178119	0.223094
269.075	337	1613	1643	1581	0.085	0.9167	0.32802	0.308052	0.385838	0.237545	0.201949	0.252943
269.18	336	1614	1644	1582	0.105	0.9167	0.327878	0.307894	0.385644	0.293565	0.249592	0.312619
269.27	335	1615	1645	1583	0.09	0.9167	0.327753	0.307757	0.385493	0.251723	0.21402	0.268078
269.36	334	1616	1646	1584	0.09	0.9167	0.327625	0.307629	0.385351	0.251822	0.214098	0.26819
269.465	333	1617	1647	1585	0.105	0.9167	0.327479	0.307434	0.385219	0.293923	0.249867	0.313086
269.56	332	1618	1648	1586	0.095	0.9167	0.327337	0.30728	0.385125	0.266045	0.226125	0.283411
269.675	331	1619	1649	1587	0.115	0.9167	0.32713	0.307141	0.384847	0.322259	0.273929	0.343232
269.755	330	1620	1650	1588	0.08	0.9167	0.327019	0.307012	0.384768	0.224256	0.190598	0.23887
269.83	329	1621	1651	1589	0.075	0.9167	0.326936	0.306881	0.384598	0.210294	0.178764	0.224037
269.96	328	1622	1652	1590	0.13	0.9167	0.326781	0.306681	0.384421	0.364682	0.310002	0.388583
270.055	327	1623	1654	1592	0.095	0.9167	0.326677	0.306538	0.384283	0.266583	0.226621	0.284097
270.175	326	1624	1655	1593	0.12	0.9167	0.326529	0.306374	0.384011	0.336889	0.286461	0.359051
270.26	325	1625	1656	1594	0.085	0.9167	0.326411	0.306247	0.383832	0.238716	0.203004	0.254433
270.365	324	1626	1657	1595	0.105	0.9167	0.326277	0.306077	0.38365	0.295006	0.250889	0.314475
270.425	323	1627	1658	1595	0.06	0.9167	0.326202	0.305993	0.383574	0.168613	0.143393	0.179749
270.505	322	1628	1659	1596	0.08	0.9167	0.326096	0.305891	0.383464	0.224891	0.191246	0.239746
270.58	321	1629	1660	1597	0.075	0.9167	0.325994	0.305775	0.383349	0.210901	0.179347	0.224847
270.685	320	1630	1660	1598	0.105	0.9167	0.325853	0.305627	0.383148	0.295389	0.251218	0.314938
270.79	319	1631	1662	1600	0.105	0.9167	0.325665	0.305506	0.382992	0.295559	0.25132	0.315062
270.91	318	1632	1663	1601	0.12	0.9167	0.325417	0.305361	0.382827	0.33804	0.287346	0.360242
271.015	317	1633	1664	1602	0.105	0.9167	0.32525	0.305169	0.38267	0.295937	0.251531	0.315411
271.1	316	1634	1665	1603	0.085	0.9167	0.325127	0.305045	0.382532	0.239659	0.203694	0.255436
271.195	315	1635	1666	1604	0.095	0.9167	0.324989	0.30492	0.382337	0.267968	0.227774	0.285605
271.27	314	1636	1667	1604	0.075	0.9167	0.324879	0.304819	0.382176	0.211625	0.179897	0.225552
271.4	313	1637	1668	1605	0.13	0.9167	0.324697	0.304611	0.381992	0.367023	0.311973	0.391223
271.475	312	1638	1669	1606	0.075	0.9167	0.324605	0.304499	0.381909	0.211804	0.180023	0.225789
271.555	311	1639	1670	1607	0.08	0.9167	0.32448	0.304394	0.381828	0.226011	0.192065	0.240925
271.625	310	1640	1671	1608	0.07	0.9167	0.324365	0.304302	0.381724	0.197829	0.168103	0.210873
271.765	309	1641	1672	1609	0.14	0.9167	0.324191	0.304091	0.3816	0.395872	0.336316	0.422039
271.85	308	1642	1673	1610	0.085	0.9167	0.324078	0.303985	0.381497	0.240435	0.204247	0.256327
272	307	1643	1674	1611	0.15	0.9167	0.323849	0.303762	0.381327	0.424596	0.360596	0.452674
272.125	306	1644	1675	1612	0.125	0.9167	0.32367	0.303567	0.381139	0.354025	0.300645	0.37747
272.32	305	1645	1676	1613	0.195	0.9167	0.323353	0.303302	0.380893	0.552822	0.469309	0.589369
272.425	304	1646	1677	1615	0.105	0.9167	0.323227	0.303188	0.380728	0.297789	0.252815	0.317472
272.525	303	1647	1678	1616	0.1	0.9167	0.323103	0.303073	0.380564	0.283718	0.24088	0.302469
272.585	302	1648	1679	1617	0.06	0.9167	0.323019	0.302988	0.38048	0.170275	0.144559	0.181532
272.65	301	1649	1680	1618	0.065	0.9167	0.322922	0.302892	0.380371	0.18452	0.156651	0.196722
272.71	300	1650	1681	1618	0.06	0.9167	0.32282	0.302806	0.380284	0.17038	0.144634	0.181641
272.855	299	1651	1682	1620	0.145	0.9167	0.322556	0.302602	0.380074	0.412088	0.349725	0.439262
272.915	298	1652	1683	1621	0.06	0.9167	0.322458	0.30253	0.379986	0.170571	0.144748	0.181807
272.98	297	1653	1684	1622	0.065	0.9167	0.322368	0.302441	0.37991	0.184837	0.156841	0.197015
273.065	296	1654	1685	1623	0.085	0.9167	0.322271	0.302318	0.379801	0.241783	0.205159	0.25774
273.17	295	1655	1686	1624	0.105	0.9167	0.322125	0.302134	0.379619	0.298808	0.253553	0.318579
273.25	294	1656	1687	1625	0.08	0.9167	0.322015	0.301999	0.379506	0.227741	0.193241	0.242836
273.305	293	1657	1688	1626	0.055	0.9167	0.321942	0.301921	0.379433	0.156607	0.132879	0.166993
273.415	292	1658	1689	1626	0.11	0.9167	0.321783	0.301769	0.379241	0.31337	0.265892	0.334152
273.515	291	1659	1690	1627	0.1	0.9167	0.321654	0.301636	0.379143	0.284996	0.241782	0.303909
273.575	290	1660	1691	1628	0.06	0.9167	0.32159	0.301536	0.379063	0.171032	0.1451	0.182406
273.635	289	1661	1692	1629	0.06	0.9167	0.32153	0.301443	0.379003	0.171063	0.145123	0.182463
273.715	288	1662	1693	1630	0.08	0.9167	0.321441	0.301315	0.378916	0.228148	0.193542	0.243387
273.8	287	1663	1694	1631	0.085	0.9167	0.321344	0.301158	0.378804	0.24248	0.205699	0.258733
273.89	286	1664	1695	1632	0.09	0.9167	0.32121	0.30102	0.378709	0.25685	0.217854	0.274079
273.97	285	1665	1696	1633	0.08	0.9167	0.321105	0.300916	0.378562	0.228386	0.193723	0.243709
274.04	284	1666	1697	1634	0.07	0.9167	0.321014	0.300821	0.378502	0.199895	0.169534	0.213313
274.16	283	1667	1698	1635	0.12	0.9167	0.320871	0.300632	0.378368	0.342829	0.290733	0.365909
274.28	282	1668	1699	1636	0.12	0.9167	0.320735	0.300425	0.378193	0.342975	0.290867	0.366161
274.385	281	1669	1701	1637	0.105	0.9167	0.32057	0.300272	0.378047	0.300257	0.254607	0.320554
274.495	280	1670	1702	1638	0.11	0.9167	0.320396	0.300147	0.377924	0.314727	0.266818	0.335959
274.6	279	1671	1703	1639	0.105	0.9167	0.320239	0.300038	0.377794	0.300567	0.254778	0.320805
274.69	278	1672	1704	1640	0.09	0.9167	0.320125	0.299923	0.377703	0.257721	0.218434	0.275081
274.76	277	1673	1705	1641	0.07	0.9167	0.320041	0.299831	0.377599	0.200502	0.169939	0.214017
274.825	276	1674	1706	1642	0.065	0.9167	0.31995	0.299747	0.377494	0.186234	0.157845	0.198786
274.985	275	1675	1707	1644	0.16	0.9167	0.319715	0.299527	0.377229	0.458758	0.388814	0.489679
275.05	274	1676	1708	1645	0.065	0.9167	0.319637	0.29942	0.377161	0.186416	0.157984	0.199003
275.18	273	1677	1709	1646	0.13	0.9167	0.319495	0.299233	0.376945	0.372998	0.31615	0.398255
275.245	272	1678	1710	1647	0.065	0.9167	0.319412	0.29913	0.37692	0.186548	0.158085	0.199196
275.33	271	1679	1711	1648	0.085	0.9167	0.319286	0.298987	0.376825	0.244043	0.206779	0.260612
275.48	270	1680	1712	1649	0.15	0.9167	0.319085	0.298788	0.376627	0.430935	0.365096	0.460209
275.6	269	1681	1713	1650	0.12	0.9167	0.318913	0.29863	0.376449	0.344934	0.292215	0.368362
275.72	268	1682	1714	1651	0.12	0.9167	0.318729	0.298458	0.376287	0.345134	0.292341	0.368575
275.8	267	1683	1715	1652	0.08	0.9167	0.31862	0.298342	0.376203	0.230168	0.194937	0.245812
275.89	266	1684	1716	1653	0.09	0.9167	0.318516	0.298229	0.376036	0.259023	0.219402	0.276643
275.98	265	1685	1717	1654	0.09	0.9167	0.318424	0.298087	0.375894	0.259098	0.219485	0.276775
276.095	264	1686	1718	1655	0.115	0.9167	0.31829	0.29788	0.375729	0.331209	0.280576	0.353903
276.185	263	1687	1719	1656	0.09	0.9167	0.318181	0.297712	0.375598	0.259296	0.219658	0.277124
276.265	262	1688	1720	1657	0.08	0.9167	0.318077	0.297577	0.3755	0.23056	0.195302	0.246444
276.35	261	1689	1721	1658	0.085	0.9167	0.317987	0.297468	0.375388	0.24504	0.20757	0.261943
276.445	260	1690	1722	1659	0.095	0.9167	0.317862	0.297336	0.375241	0.273976	0.232082	0.292889
276.565	259	1691	1723	1660	0.12	0.9167	0.317691	0.297137	0.375083	0.346261	0.293279	0.370213
276.7	258	1692	1725	1661	0.135	0.9167	0.31753	0.296895	0.374976	0.389741	0.330033	0.41683
276.785	257	1693	1726	1662	0.085	0.9167	0.317431	0.296749	0.374893	0.245469	0.207845	0.262577
276.85	256	1694	1727	1663	0.065	0.9167	0.317351	0.296632	0.374787	0.187759	0.158985	0.200873
276.905	255	1695	1728	1664	0.055	0.9167	0.317283	0.296528	0.374659	0.158907	0.134572	0.17003
276.98	254	1696	1729	1665	0.075	0.9167	0.317193	0.296386	0.374572	0.216753	0.183549	0.23197
277.03	253	1697	1729	1666	0.05	0.9167	0.317135	0.2963	0.374519	0.144528	0.122384	0.154691
277.105	252	1698	1730	1667	0.075	0.9167	0.317047	0.296173	0.374422	0.216853	0.183623	0.232136
277.175	251	1699	1731	1667	0.07	0.9167	0.316959	0.296053	0.374303	0.202452	0.171436	0.216748
277.235	250	1700	1732	1668	0.06	0.9167	0.316877	0.295969	0.374243	0.173575	0.146969	0.185837
277.325	249	1701	1733	1670	0.09	0.9167	0.316738	0.295843	0.374106	0.260477	0.220534	0.278874
277.405	248	1702	1734	1671	0.08	0.9167	0.316625	0.295698	0.373935	0.231618	0.19612	0.24801
277.48	247	1703	1735	1672	0.075	0.9167	0.31653	0.295544	0.373833	0.217207	0.183912	0.23263
277.555	246	1704	1736	1673	0.075	0.9167	0.316423	0.295392	0.373784	0.21728	0.183936	0.23275
277.675	245	1705	1737	1674	0.12	0.9167	0.316256	0.295181	0.373613	0.347832	0.294433	0.372666
277.75	244	1706	1739	1675	0.075	0.9167	0.316122	0.295073	0.373537	0.217487	0.184058	0.233002
277.85	243	1707	1740	1676	0.1	0.9167	0.315945	0.294941	0.37343	0.290145	0.245481	0.310807
277.93	242	1708	1741	1677	0.08	0.9167	0.315836	0.29484	0.373302	0.232196	0.196452	0.248731
278.02	241	1709	1742	1678	0.09	0.9167	0.31573	0.29467	0.3732	0.261308	0.221069	0.279984
278.105	240	1710	1743	1679	0.085	0.9167	0.315611	0.294458	0.373092	0.246885	0.208848	0.26462
278.165	239	1711	1744	1680	0.06	0.9167	0.315517	0.294352	0.37303	0.174323	0.147447	0.186858
278.275	238	1712	1745	1681	0.11	0.9167	0.315361	0.294207	0.372905	0.319751	0.270409	0.342742
278.36	237	1713	1746	1682	0.085	0.9167	0.315247	0.294092	0.372827	0.247169	0.208996	0.264949
278.44	236	1714	1747	1683	0.08	0.9167	0.315122	0.293994	0.372717	0.232722	0.19676	0.249447
278.54	235	1715	1748	1684	0.1	0.9167	0.314975	0.293861	0.3726	0.291039	0.246028	0.31195
278.6	234	1716	1749	1685	0.06	0.9167	0.314896	0.293767	0.372526	0.174667	0.147646	0.18723
278.675	233	1717	1750	1686	0.075	0.9167	0.314807	0.293629	0.372424	0.218396	0.184608	0.234148
278.725	232	1718	1751	1687	0.05	0.9167	0.314744	0.293536	0.372358	0.145626	0.123094	0.156148
278.8	231	1719	1752	1688	0.075	0.9167	0.314641	0.293423	0.372252	0.218511	0.184693	0.234312
278.86	230	1720	1752	1689	0.06	0.9167	0.314554	0.293322	0.372164	0.174857	0.14779	0.187514
278.965	229	1721	1753	1689	0.105	0.9167	0.314396	0.293145	0.372005	0.306153	0.258742	0.328348
279.02	228	1722	1754	1690	0.055	0.9167	0.314319	0.293036	0.371926	0.160406	0.135561	0.172055
279.085	227	1723	1755	1691	0.065	0.9167	0.314241	0.292906	0.371847	0.189617	0.160242	0.203429
279.16	226	1724	1756	1692	0.075	0.9167	0.314136	0.292784	0.371768	0.218862	0.184934	0.234824
279.26	225	1725	1757	1693	0.1	0.9167	0.313956	0.292651	0.371658	0.291984	0.246652	0.31324
279.32	224	1726	1758	1694	0.06	0.9167	0.313859	0.29256	0.371595	0.175244	0.148016	0.188002
279.395	223	1727	1759	1695	0.075	0.9167	0.31376	0.292455	0.371526	0.219124	0.185054	0.235087
279.46	222	1728	1760	1696	0.065	0.9167	0.313675	0.292377	0.371462	0.189959	0.160408	0.203796
279.52	221	1729	1761	1697	0.06	0.9167	0.313588	0.292303	0.371381	0.175396	0.148101	0.188168
279.62	220	1730	1762	1698	0.1	0.9167	0.31344	0.292136	0.37126	0.292465	0.246916	0.313793
279.715	219	1731	1763	1699	0.095	0.9167	0.313287	0.291963	0.371159	0.277977	0.234634	0.298279
279.815	218	1732	1764	1700	0.1	0.9167	0.31309	0.291803	0.37106	0.292791	0.247049	0.314151
279.875	217	1733	1765	1701	0.06	0.9167	0.312985	0.291702	0.371001	0.175734	0.148253	0.188556
279.985	216	1734	1766	1702	0.11	0.9167	0.312823	0.291545	0.370876	0.322345	0.271889	0.345871
280.005	215	1735	1767	1703	0.02	0.9167	0.312795	0.291511	0.370851	0.0586134	0.0494377	0.0628929
280.085	214	1736	1768	1704	0.08	0.9167	0.312685	0.291368	0.370726	0.234536	0.197817	0.251695
280.165	213	1737	1769	1705	0.08	0.9167	0.312576	0.29123	0.370626	0.234618	0.19787	0.251815
280.235	212	1738	1770	1706	0.07	0.9167	0.312482	0.291076	0.370544	0.205353	0.173175	0.220454
280.335	211	1739	1771	1707	0.1	0.9167	0.312325	0.290839	0.370408	0.293508	0.247484	0.315192
280.405	210	1740	1772	1708	0.07	0.9167	0.312209	0.290706	0.370316	0.205532	0.173282	0.220735
280.475	209	1741	1773	1709	0.07	0.9167	0.312094	0.290602	0.370244	0.205608	0.173316	0.220814
280.59	208	1742	1775	1710	0.115	0.9167	0.311902	0.290412	0.370123	0.337992	0.284826	0.363004
280.68	207	1743	1776	1711	0.09	0.9167	0.311763	0.290251	0.370013	0.264634	0.222973	0.284247
280.76	206	1744	1777	1712	0.08	0.9167	0.311637	0.290098	0.369863	0.235325	0.198279	0.252797
280.84	205	1745	1778	1713	0.08	0.9167	0.311502	0.289962	0.369743	0.235427	0.198343	0.252916
280.915	204	1746	1779	1714	0.075	0.9167	0.311386	0.289847	0.369685	0.220795	0.185976	0.237203
280.995	203	1747	1780	1715	0.08	0.9167	0.311284	0.289743	0.369617	0.235592	0.198411	0.253107
281.09	202	1748	1781	1716	0.095	0.9167	0.311162	0.289641	0.369462	0.279875	0.235712	0.30067
281.165	201	1749	1782	1717	0.075	0.9167	0.311066	0.289532	0.369342	0.221022	0.186148	0.237461
281.21	200	1750	1783	1718	0.045	0.9167	0.311009	0.28946	0.369295	0.132638	0.111703	0.142512
281.245	199	1751	1784	1719	0.035	0.9167	0.310964	0.289408	0.36928	0.103177	0.086884	0.110863
281.325	198	1752	1785	1719	0.08	0.9167	0.310853	0.289292	0.369158	0.235919	0.198657	0.253501
281.455	197	1753	1787	1721	0.13	0.9167	0.310679	0.289091	0.368931	0.383582	0.323017	0.412227
281.515	196	1754	1788	1722	0.06	0.9167	0.310612	0.288976	0.368846	0.177076	0.149119	0.190334
281.585	195	1755	1789	1723	0.07	0.9167	0.310516	0.288868	0.368757	0.206653	0.174014	0.222139
281.68	194	1756	1790	1724	0.095	0.9167	0.310361	0.288735	0.36866	0.280598	0.236224	0.301614
281.735	193	1757	1791	1725	0.055	0.9167	0.310269	0.288676	0.368608	0.162499	0.136781	0.174654
281.88	192	1758	1792	1726	0.145	0.9167	0.310054	0.288514	0.368404	0.428705	0.360804	0.460711
281.96	191	1759	1793	1727	0.08	0.9167	0.309928	0.288417	0.368294	0.236623	0.199123	0.254271
282	190	1760	1794	1728	0.04	0.9167	0.309865	0.288357	0.368243	0.118336	0.0995756	0.127162
282.085	189	1761	1796	1729	0.085	0.9167	0.30973	0.288198	0.368191	0.251572	0.211628	0.270368
282.13	188	1762	1797	1729	0.045	0.9167	0.309659	0.288105	0.368123	0.133216	0.112059	0.143182
282.205	187	1763	1798	1730	0.075	0.9167	0.309532	0.287974	0.368027	0.222117	0.186814	0.238745
282.3	186	1764	1799	1731	0.095	0.9167	0.309352	0.287804	0.367935	0.281513	0.23669	0.30259
282.36	185	1765	1800	1732	0.06	0.9167	0.309249	0.28771	0.367827	0.177857	0.149532	0.191171
282.435	184	1766	1801	1733	0.075	0.9167	0.309138	0.28759	0.36771	0.222401	0.186975	0.239064
282.48	183	1767	1802	1734	0.045	0.9167	0.309074	0.287493	0.367661	0.133468	0.1122	0.143487
282.545	182	1768	1803	1735	0.065	0.9167	0.30898	0.287369	0.367596	0.192846	0.162095	0.207348
282.61	181	1769	1804	1736	0.065	0.9167	0.308885	0.287258	0.367474	0.192905	0.162149	0.207428
282.695	180	1770	1805	1737	0.085	0.9167	0.308758	0.287116	0.367376	0.252364	0.212098	0.271387
282.755	179	1771	1806	1738	0.06	0.9167	0.308652	0.287015	0.3673	0.178201	0.149747	0.191635
282.83	178	1772	1807	1739	0.075	0.9167	0.30852	0.286895	0.367202	0.222846	0.187233	0.239643
282.905	177	1773	1808	1740	0.075	0.9167	0.308392	0.286792	0.367121	0.222938	0.187275	0.239729
283	176	1774	1809	1741	0.095	0.9167	0.308239	0.286657	0.366968	0.282529	0.237313	0.3038
283.085	175	1775	1810	1742	0.085	0.9167	0.308109	0.286539	0.366913	0.252896	0.212365	0.271934
283.17	174	1776	1811	1743	0.085	0.9167	0.308005	0.286419	0.366794	0.252981	0.212434	0.272047
283.235	173	1777	1812	1744	0.065	0.9167	0.307931	0.286316	0.3667	0.193503	0.162491	0.208111
283.28	172	1778	1813	1745	0.045	0.9167	0.307863	0.286245	0.366643	0.133993	0.112511	0.144112
283.35	171	1779	1814	1746	0.07	0.9167	0.307732	0.286137	0.366564	0.208522	0.175055	0.22426
283.405	170	1780	1815	1747	0.055	0.9167	0.307629	0.286054	0.366509	0.163894	0.137564	0.176255
283.465	169	1781	1816	1748	0.06	0.9167	0.307546	0.285958	0.366438	0.178841	0.150099	0.192343
283.545	168	1782	1817	1749	0.08	0.9167	0.30742	0.285821	0.366343	0.238553	0.200184	0.25658
283.605	167	1783	1818	1749	0.06	0.9167	0.307313	0.285729	0.366291	0.178977	0.150159	0.192497
283.655	166	1784	1819	1750	0.05	0.9167	0.307223	0.285654	0.366222	0.149191	0.125156	0.160456
283.71	165	1785	1820	1751	0.055	0.9167	0.307146	0.285575	0.36615	0.164152	0.137699	0.176551
283.77	164	1786	1821	1752	0.06	0.9167	0.307065	0.2855	0.366104	0.179122	0.150236	0.192651
283.85	163	1787	1822	1753	0.08	0.9167	0.306957	0.28539	0.366025	0.238913	0.200358	0.256968
283.94	162	1788	1823	1754	0.09	0.9167	0.306842	0.285276	0.365893	0.268878	0.225484	0.289204
284	161	1789	1824	1755	0.06	0.9167	0.30677	0.285205	0.365808	0.179294	0.150357	0.192851
284.07	160	1790	1825	1756	0.07	0.9167	0.306681	0.285108	0.365719	0.209237	0.17546	0.225069
284.155	159	1791	1826	1757	0.085	0.9167	0.306557	0.284953	0.365587	0.254177	0.213135	0.273447
284.21	158	1792	1827	1758	0.055	0.9167	0.306475	0.28486	0.365515	0.164511	0.137938	0.176994
284.275	157	1793	1828	1759	0.065	0.9167	0.30639	0.284763	0.365443	0.194476	0.16305	0.209246
284.33	156	1794	1829	1760	0.055	0.9167	0.306309	0.284685	0.365381	0.1646	0.137989	0.177103
284.445	155	1795	1830	1761	0.115	0.9167	0.306119	0.284496	0.365158	0.344378	0.288698	0.370552
284.53	154	1796	1831	1762	0.085	0.9167	0.306005	0.284363	0.365069	0.254635	0.213438	0.274014
284.575	153	1797	1832	1763	0.045	0.9167	0.305945	0.284304	0.365038	0.134833	0.113006	0.145096
284.625	152	1798	1833	1764	0.05	0.9167	0.305884	0.284243	0.364958	0.149844	0.12559	0.161253
284.73	151	1799	1834	1765	0.105	0.9167	0.305751	0.28414	0.364786	0.31481	0.263863	0.338754
284.81	150	1800	1835	1766	0.08	0.9167	0.30563	0.284022	0.364664	0.23995	0.201105	0.258206
284.85	149	1801	1836	1767	0.04	0.9167	0.305565	0.28396	0.364595	0.120001	0.100572	0.129131
284.985	148	1802	1837	1768	0.135	0.9167	0.305335	0.283803	0.364422	0.405307	0.339591	0.436057
285.07	147	1803	1839	1769	0.085	0.9167	0.305196	0.28369	0.364298	0.25531	0.21389	0.274664
285.155	146	1804	1840	1770	0.085	0.9167	0.305077	0.283566	0.364207	0.255409	0.213943	0.274785
285.2	145	1805	1841	1771	0.045	0.9167	0.30502	0.283509	0.36417	0.135242	0.113275	0.145503
285.26	144	1806	1842	1772	0.06	0.9167	0.304937	0.283445	0.364067	0.180372	0.151077	0.194048
285.34	143	1807	1843	1773	0.08	0.9167	0.304801	0.28337	0.363935	0.240603	0.201508	0.2588
285.425	142	1808	1844	1774	0.085	0.9167	0.304632	0.283271	0.363828	0.255782	0.214166	0.275071
285.495	141	1809	1845	1775	0.07	0.9167	0.304515	0.283174	0.363745	0.210725	0.176412	0.226606
285.53	140	1810	1845	1775	0.035	0.9167	0.304468	0.283125	0.363698	0.105379	0.0882174	0.113323
285.61	139	1811	1846	1776	0.08	0.9167	0.304358	0.283003	0.363595	0.240953	0.201697	0.259135
285.655	138	1812	1847	1777	0.045	0.9167	0.304295	0.28292	0.363539	0.135564	0.113472	0.145806
285.765	137	1813	1848	1778	0.11	0.9167	0.304129	0.282738	0.363386	0.33156	0.277493	0.356645
285.85	136	1814	1849	1779	0.085	0.9167	0.303993	0.282617	0.363316	0.25632	0.214468	0.275707
285.905	135	1815	1850	1780	0.055	0.9167	0.303911	0.28253	0.363257	0.165899	0.138796	0.178453
286	134	1816	1851	1781	0.095	0.9167	0.303797	0.282417	0.363171	0.286661	0.239795	0.308361
286.065	133	1817	1852	1782	0.065	0.9167	0.303716	0.282341	0.363032	0.196188	0.164133	0.211041
286.145	132	1818	1853	1783	0.08	0.9167	0.303626	0.282245	0.362911	0.241534	0.202077	0.259831
286.205	131	1819	1854	1784	0.06	0.9167	0.303556	0.282169	0.362842	0.181192	0.151587	0.194925
286.295	130	1820	1855	1785	0.09	0.9167	0.303441	0.282048	0.362727	0.271892	0.227452	0.292514
286.335	129	1821	1856	1786	0.04	0.9167	0.303389	0.281986	0.362684	0.120861	0.101102	0.130035
286.415	128	1822	1857	1787	0.08	0.9167	0.303293	0.281854	0.36258	0.2418	0.202262	0.260191
286.5	127	1823	1858	1788	0.085	0.9167	0.303191	0.281735	0.362458	0.256998	0.214975	0.276571
286.56	126	1824	1859	1789	0.06	0.9167	0.303116	0.281644	0.362368	0.181456	0.151785	0.195289
286.62	125	1825	1860	1790	0.06	0.9167	0.303037	0.281564	0.362275	0.181503	0.151824	0.195344
286.69	124	1826	1861	1791	0.07	0.9167	0.302937	0.281472	0.362212	0.211823	0.177159	0.227976
286.735	123	1827	1862	1792	0.045	0.9167	0.302867	0.281411	0.362169	0.136203	0.113901	0.146588
286.815	122	1828	1863	1793	0.08	0.9167	0.302745	0.281295	0.362071	0.242237	0.202546	0.260709
286.865	121	1829	1864	1794	0.05	0.9167	0.30268	0.281217	0.361972	0.151431	0.126626	0.162988
286.93	120	1830	1865	1795	0.065	0.9167	0.302616	0.281134	0.361879	0.196901	0.164656	0.211947
287.025	119	1831	1866	1796	0.095	0.9167	0.302534	0.280998	0.361785	0.287857	0.240713	0.309919
287.09	118	1832	1867	1797	0.065	0.9167	0.302471	0.280922	0.361711	0.196996	0.164732	0.212107
287.18	117	1833	1868	1798	0.09	0.9167	0.302398	0.280794	0.361574	0.272829	0.228177	0.29382
287.25	116	1834	1869	1799	0.07	0.9167	0.302323	0.280694	0.361476	0.212253	0.17752	0.228609
287.325	115	1835	1870	1800	0.075	0.9167	0.302258	0.280593	0.361386	0.227463	0.190247	0.245025
287.45	114	1836	1872	1801	0.125	0.9167	0.302146	0.280427	0.361209	0.379246	0.317233	0.408618
287.52	113	1837	1873	1802	0.07	0.9167	0.302085	0.280351	0.361124	0.212421	0.177692	0.228888
287.555	112	1838	1874	1803	0.035	0.9167	0.302059	0.280301	0.361086	0.106219	0.0888557	0.114465
287.665	111	1839	1876	1804	0.11	0.9167	0.301955	0.28015	0.360983	0.333947	0.27934	0.359939
287.75	110	1840	1877	1805	0.085	0.9167	0.301879	0.280066	0.360892	0.258115	0.215908	0.278218
287.85	109	1841	1878	1806	0.1	0.9167	0.30179	0.279922	0.36079	0.303754	0.254082	0.327484
287.905	108	1842	1879	1807	0.055	0.9167	0.30174	0.279826	0.360705	0.167092	0.139778	0.180178
287.995	107	1843	1880	1808	0.09	0.9167	0.301659	0.27969	0.360581	0.273497	0.228806	0.29498
288.065	106	1844	1881	1809	0.07	0.9167	0.3016	0.279574	0.360504	0.212762	0.177998	0.229524
288.125	105	1845	1881	1810	0.06	0.9167	0.301542	0.279478	0.360439	0.182403	0.152597	0.196803
288.23	104	1846	1882	1811	0.105	0.9167	0.301436	0.279332	0.36028	0.319316	0.267163	0.344585
288.305	103	1847	1883	1812	0.075	0.9167	0.301375	0.279245	0.360222	0.22813	0.190862	0.246209
288.37	102	1848	1884	1813	0.065	0.9167	0.30132	0.279173	0.360152	0.197749	0.165446	0.213436
288.44	101	1849	1885	1814	0.07	0.9167	0.301254	0.279078	0.360035	0.213006	0.17823	0.229932
288.525	100	1850	1886	1815	0.085	0.9167	0.301179	0.27893	0.359887	0.258715	0.216511	0.279351
288.605	99	1851	1887	1816	0.08	0.9167	0.301103	0.278789	0.35977	0.243558	0.203841	0.263052
288.645	98	1852	1888	1816	0.04	0.9167	0.301062	0.278739	0.359717	0.121796	0.101936	0.13155
288.7	97	1853	1889	1817	0.055	0.9167	0.301018	0.278674	0.359627	0.167494	0.140197	0.180923
288.76	96	1854	1890	1818	0.06	0.9167	0.300967	0.27858	0.359551	0.182751	0.152974	0.197437
288.89	95	1855	1891	1819	0.13	0.9167	0.300849	0.278404	0.359449	0.396116	0.331538	0.428051
288.955	94	1856	1892	1820	0.065	0.9167	0.300792	0.278323	0.359328	0.198095	0.165825	0.214088
289.025	93	1857	1893	1821	0.07	0.9167	0.300728	0.278227	0.359212	0.213379	0.178638	0.230635
289.08	92	1858	1894	1822	0.055	0.9167	0.300674	0.27816	0.359151	0.167685	0.140382	0.181257
289.165	91	1859	1895	1823	0.085	0.9167	0.300597	0.278075	0.359009	0.259216	0.217041	0.280211
289.255	90	1860	1896	1824	0.09	0.9167	0.300518	0.277966	0.358834	0.274536	0.22992	0.29681
289.34	89	1861	1897	1825	0.085	0.9167	0.300441	0.277851	0.358742	0.25935	0.217202	0.280436
289.39	88	1862	1898	1826	0.05	0.9167	0.300395	0.277801	0.358677	0.152582	0.127789	0.164992
289.45	87	1863	1899	1827	0.06	0.9167	0.300342	0.27772	0.358604	0.183131	0.153378	0.198048
289.56	86	1864	1900	1828	0.11	0.9167	0.300234	0.277557	0.358477	0.335861	0.281293	0.363302
289.615	85	1865	1901	1829	0.055	0.9167	0.300186	0.27748	0.358401	0.167958	0.140676	0.181702
289.68	84	1866	1902	1830	0.065	0.9167	0.300132	0.277396	0.358284	0.198531	0.166308	0.214803
289.76	83	1867	1904	1831	0.08	0.9167	0.30006	0.277301	0.358164	0.244404	0.204755	0.264464
289.84	82	1868	1905	1832	0.08	0.9167	0.299986	0.277218	0.358042	0.244464	0.204825	0.264542
289.915	81	1869	1906	1833	0.075	0.9167	0.299918	0.277131	0.357968	0.229238	0.192063	0.248086
289.995	80	1870	1907	1834	0.08	0.9167	0.299846	0.277037	0.35788	0.244579	0.204918	0.264716
290.07	79	1871	1908	1835	0.075	0.9167	0.29978	0.276924	0.357803	0.229343	0.192152	0.248272
290.12	78	1872	1909	1836	0.05	0.9167	0.299734	0.27686	0.357771	0.152919	0.128113	0.165553
290.17	77	1873	1910	1837	0.05	0.9167	0.299687	0.276813	0.357709	0.152943	0.128135	0.165581
290.23	76	1874	1911	1838	0.06	0.9167	0.299634	0.276756	0.357637	0.183564	0.153793	0.198738
290.295	75	1875	1912	1839	0.065	0.9167	0.299577	0.276675	0.35757	0.198899	0.16664	0.215363
290.385	74	1876	1913	1840	0.09	0.9167	0.299497	0.276549	0.357449	0.275472	0.23081	0.29833
290.455	73	1877	1914	1841	0.07	0.9167	0.299429	0.276458	0.35739	0.214304	0.179549	0.232111
290.51	72	1878	1915	1842	0.055	0.9167	0.299377	0.276386	0.35731	0.168412	0.141106	0.182421
290.6	71	1879	1916	1843	0.09	0.9167	0.299302	0.276277	0.357182	0.275651	0.230983	0.298624
290.64	70	1880	1917	1844	0.04	0.9167	0.299264	0.276233	0.357134	0.122527	0.102673	0.132743
290.715	69	1881	1918	1845	0.075	0.9167	0.299194	0.276121	0.357034	0.229793	0.192566	0.248994
290.815	68	1882	1919	1846	0.1	0.9167	0.299104	0.276009	0.356911	0.306482	0.256842	0.332126
290.915	67	1883	1920	1847	0.1	0.9167	0.29901	0.275866	0.356713	0.306579	0.256985	0.332299
290.985	66	1884	1921	1848	0.07	0.9167	0.298947	0.275775	0.356646	0.21465	0.179923	0.232686
291.07	65	1885	1922	1849	0.085	0.9167	0.298874	0.27566	0.356534	0.26071	0.218547	0.282666
291.125	64	1886	1923	1850	0.055	0.9167	0.298822	0.275589	0.356474	0.168724	0.141437	0.182948
291.175	63	1887	1923	1851	0.05	0.9167	0.298768	0.275526	0.35642	0.153413	0.128598	0.166355
291.295	62	1888	1924	1852	0.12	0.9167	0.298668	0.275367	0.356277	0.368315	0.30876	0.399482
291.36	61	1889	1925	1853	0.065	0.9167	0.298606	0.275285	0.356184	0.199545	0.167289	0.21645
291.455	60	1890	1927	1854	0.095	0.9167	0.298521	0.275148	0.356057	0.291726	0.244586	0.316507
291.565	59	1891	1928	1855	0.11	0.9167	0.298424	0.274995	0.355934	0.337898	0.283303	0.366686
291.63	58	1892	1929	1856	0.065	0.9167	0.298362	0.274928	0.355842	0.199709	0.167449	0.216731
291.695	57	1893	1930	1857	0.065	0.9167	0.298305	0.274845	0.355747	0.199747	0.167494	0.216797
291.76	56	1894	1931	1858	0.065	0.9167	0.298245	0.274756	0.355638	0.199787	0.167545	0.216867
291.84	55	1895	1932	1859	0.08	0.9167	0.29817	0.274666	0.355497	0.245954	0.206292	0.267001
291.945	54	1896	1933	1860	0.105	0.9167	0.29808	0.274545	0.355318	0.322912	0.270894	0.350593
292.025	53	1897	1934	1861	0.08	0.9167	0.298002	0.274438	0.355196	0.246092	0.206466	0.267223
292.1	52	1898	1935	1862	0.075	0.9167	0.297933	0.274328	0.355144	0.230765	0.193591	0.250622
292.15	51	1899	1936	1863	0.05	0.9167	0.297886	0.274255	0.355075	0.153868	0.129085	0.167126
292.205	50	1900	1937	1864	0.055	0.9167	0.297837	0.274185	0.354992	0.169282	0.142027	0.183885
292.255	49	1901	1937	1864	0.05	0.9167	0.297794	0.274118	0.354927	0.153915	0.129139	0.167209
292.33	48	1902	1938	1865	0.075	0.9167	0.29772	0.274023	0.354805	0.23093	0.193775	0.2509
292.39	47	1903	1939	1866	0.06	0.9167	0.297669	0.273944	0.3547	0.184776	0.155066	0.200779
292.455	46	1904	1940	1867	0.065	0.9167	0.297611	0.273862	0.354593	0.200213	0.168039	0.217575
292.51	45	1905	1941	1868	0.055	0.9167	0.297561	0.273804	0.354497	0.169439	0.142225	0.184141
292.605	44	1906	1942	1869	0.095	0.9167	0.297475	0.273723	0.354362	0.292753	0.245756	0.318156
292.675	43	1907	1943	1870	0.07	0.9167	0.29741	0.273654	0.354244	0.215759	0.181143	0.23449
292.755	42	1908	1944	1871	0.08	0.9167	0.297333	0.273554	0.354091	0.246646	0.20711	0.268086
292.82	41	1909	1946	1872	0.065	0.9167	0.297274	0.273468	0.35398	0.20044	0.16833	0.217888
292.935	40	1910	1947	1873	0.115	0.9167	0.297169	0.273304	0.353804	0.354749	0.297963	0.385727
292.995	39	1911	1948	1874	0.06	0.9167	0.297114	0.273223	0.353703	0.185121	0.155504	0.201308
293.07	38	1912	1949	1875	0.075	0.9167	0.297046	0.27313	0.353606	0.231454	0.194432	0.251721
293.13	37	1913	1950	1876	0.06	0.9167	0.296993	0.273049	0.35355	0.185196	0.15557	0.201437
293.185	36	1914	1950	1877	0.055	0.9167	0.296943	0.272984	0.353471	0.169792	0.142638	0.184694
293.265	35	1915	1951	1878	0.08	0.9167	0.29687	0.27289	0.353331	0.247031	0.207556	0.268739
293.355	34	1916	1952	1879	0.09	0.9167	0.296792	0.27276	0.353154	0.277983	0.233618	0.302474
293.405	33	1917	1954	1880	0.05	0.9167	0.296747	0.272656	0.353054	0.154458	0.129824	0.168106
293.485	32	1918	1955	1881	0.08	0.9167	0.296673	0.272514	0.352894	0.247195	0.207813	0.26911
293.565	31	1919	1956	1882	0.08	0.9167	0.296597	0.27242	0.352792	0.247258	0.207873	0.269202
293.665	30	1920	1957	1883	0.1	0.9167	0.2965	0.272293	0.352653	0.309174	0.259944	0.33666
293.77	29	1921	1958	1884	0.105	0.9167	0.296404	0.27215	0.352541	0.324737	0.273028	0.353678
293.865	28	1922	1959	1885	0.095	0.9167	0.296319	0.272028	0.352455	0.293895	0.247085	0.320138
293.94	27	1923	1960	1886	0.075	0.9167	0.29625	0.271931	0.352317	0.232076	0.195144	0.25283
[truncated: 726 more rows]
