# Supplementary material for: A 2700-year annual timescale and accumulation history for an ice core from Roosevelt Island, West Antarctica
Source: Copernicus journal article supplement (doi:10.5194/cp-15-751-2019), 2019-04-10
Supplement: Supplementary file 2 [file RICE_WD_matchpoints.xlsx]

## Sheet: Sheet1
Volcanic matchpoints between RICE and WAIS Divide (RICE: 0-344 m; 2012 BC - 700 BCE)
Volcanic imprints in RICE were identified on basis of multiple volcanic proxy records (total acidity, non-sea-salt conductivity, non-sea-salt sulfur, and ECM).
Match points between RICE and WAIS Divide were found by identifying common sequential patterns of volcanic peaks in the two cores.
For questions on the use or construction of these matchpoints, please contact:
Mai Winstrup	mai@nbi.ku.dk
Reference:
Winstrup et al., A 2700-year annual timescale and accumulation history for an ice core from Roosevelt Island, West Antarctica, Climate of the Past (2019)
RICE depth (m)	RICE17 age (CE)	WAIS depth (m)	WD2014 age (CE)
18.15	1965.1	16.37	1964.8
37.45	1903.8	35.141	1904
42.34	1885	40.709	1885
47.9	1863.3	46.528	1863.9
59.46	1817	58.901	1816.4
80.09	1722.3	81.446	1723.5
85.99	1695	87.841	1695.8
97.12	1641.2	100.487	1642.4
105.58	1599.3	110.263	1600.9
122.67	1507	132.293	1506.7
125.19	1493.4	135.397	1492.4
131.04	1458.4	142.955	1459.8
145.15	1376.2	161.493	1378.7
161.02	1277.3	184.6	1277.2
162.17	1269.9	186.196	1269.7
164.06	1257.3	188.685	1258.9
165.02	1251.5	190.38	1251.6
166.68	1242.3	192.774	1241.9
168.32	1231.4	195.333	1230.7
174.5	1190.1	204.494	1191.9
180.01	1152.3	213.347	1153
194.81	1043.3	240.006	1040.3
203.44	974.5	255.328	976
208.11	937.1	264.213	939.6
211.02	912.6	269.738	918.1
212.03	903.9	271.902	909
212.88	896.3	273.591	900.9
222.94	813.2	292.98	819.9
232.66	720.3	315.336	726.1
235.78	693.1	322.333	698
236.94	683	325.089	685.9
237.25	680.1	325.88	682.9
247.49	575.1	351.406	576.2
250.93	539.2	359.745	541.7
260.59	434.3	384.687	435.4
264.19	394.4	394.419	395.5
267.41	356.9	402.515	360.8
276.06	264.3	423.787	266.6
278.41	236.4	430.054	237.1
280.82	205.3	437.595	207.1
283.36	170.9	445.591	171
284.97	148.1	451.871	143.9
286.17	131.6	455.877	125.3
286.4	128.1	456.568	121.9
287.49	113.4	460.343	105.5
288.11	105.2	462.241	97.8
288.35	102.3	462.766	96
289.18	90.8	465.708	83.8
289.54	86.2	467.23	77.5
292.8	41.2	477.717	31.7
296.12	3.1	486.318	-7.5
297.24	-10.9	489.054	-20.3
299.3	-34	495.115	-46.3
306.39	-130.9	517.345	-143.1
306.89	-137.9	518.565	-148.1
317.3	-295.9	555.963	-307.2
320.87	-344.4	567.805	-357
322.15	-362.8	572.266	-376.5
323.14	-376.7	576.064	-392.1
323.84	-385.7	578.654	-402.7
325.25	-405.7	583.918	-426.1
328.05	-446.6	594.039	-469.1
331.21	-496.4	605.43	-519.9
334.94	-554.7	619.422	-581
335.84	-567.5	623.098	-596.6
343.3	-691.5	651.924	-722
