# Supplementary material for: A 2700-year annual timescale and accumulation history for an ice core from Roosevelt Island, West Antarctica
Source: Copernicus journal article supplement (doi:10.5194/cp-15-751-2019), 2019-04-10
Supplement: Supplementary file 3 [file Timescales_and_accumulation_rates_from_three_Roosevelt_Island_cores.xlsx]

## Sheet: Metadata
Timescales and accumulation records for three ice cores from Roosevelt Island
Dating method:	Manual annual layer counting with age constraints from historical events. An estimated 95% age confidence interval is provided.
Accumulation rates:	Past annual accumulation rates were obtained from the annual layer thicknesses, after correction for firn densification and layer thinning due to ice flow. For all cores, the density correction was based on measured densities from the main RICE core, and the thinning function was assumed identical. The uncertainty of past accumulation rates was estimated based on the uncertainty in ice flow thinn…
Note:	The RICE17 timescale (Winstrup et al, 2019) was produced by combining data from the main RICE core and the shallow core RICE-12/13-B.
For questions on the use or construction of these chronologies and corresponding accumulation rate histories, please contact:
Mai Winstrup, Centre for Ice and Climate, University of Copenhagen			mai@nbi.ku.dk
Reference:	Winstrup et al, A 2700-year annual timescale and accumulation history for an ice core from Roosevelt Island, West Antarctica, Climate of the Past (2019)

## Sheet: RICE-main
Core:	RICE-main
Location:	79°21.839' S, 161°42.387' W
Drilled:	2011/12 (0-130 m)
Parameters used for annual layer counting: Continuous flow measurements of black carbon, Ca, pH, conductivity; stable isotopes; discrete samples of Na, Ca, Mg, I, and SO4, among others
Counting method: Manual
Depth [m]	Age [CE]	Layer thickness [m]	Density [g/cm3]	Thinning	Min thinning	Max thinning	Accumulation [m.w.eq]	Min accumulation [m.w.eq]	Max accumulation [m.w.eq]
8.666	1992	0.52	0.550638	0.987001	0.975522	0.989321	0.290103	0.289422	0.293516
9.126	1991	0.46	0.550737	0.986182	0.973974	0.988583	0.256889	0.256265	0.260109
9.288	1990	0.162	0.550758	0.985841	0.9732	0.988233	0.0905043	0.0902852	0.0916799
9.608	1989	0.32	0.550758	0.985374	0.972321	0.987784	0.178859	0.178422	0.18126
9.938	1988	0.33	0.550758	0.983954	0.970388	0.986805	0.184714	0.184181	0.187297
10.347	1987	0.409	0.573086	0.983438	0.969522	0.986386	0.23834	0.237627	0.241761
10.726	1986	0.379	0.573086	0.982922	0.968771	0.986068	0.220974	0.220268	0.224201
11.092	1985	0.366	0.573086	0.982187	0.967356	0.985427	0.213554	0.212852	0.216828
11.493	1984	0.401	0.581882	0.981381	0.965924	0.984695	0.237762	0.236961	0.241567
11.84	1983	0.347	0.581882	0.980614	0.964702	0.984074	0.205905	0.205181	0.209301
12.114	1982	0.274	0.581882	0.980074	0.963811	0.983653	0.162677	0.162085	0.165422
12.541	1981	0.427	0.593385	0.979299	0.962515	0.983041	0.260547	0.257748	0.263246
13.094	1980	0.553	0.593385	0.978084	0.960562	0.982045	0.333673	0.334142	0.341617
13.43	1979	0.336	0.600827	0.9774	0.959332	0.981485	0.209004	0.205687	0.210438
13.756	1978	0.326	0.600827	0.97657	0.957872	0.980798	0.203031	0.199704	0.204482
14.043	1977	0.287	0.600827	0.975627	0.956575	0.980053	0.172435	0.175947	0.180265
14.267	1976	0.224	0.601504	0.975099	0.955742	0.979584	0.141879	0.137545	0.140976
14.647	1975	0.38	0.601504	0.974351	0.954451	0.978942	0.23459	0.233487	0.239476
14.893	1974	0.246	0.601504	0.973879	0.95372	0.978543	0.154411	0.151214	0.155148
15.368	1973	0.475	0.620449	0.973133	0.952361	0.977908	0.299665	0.301369	0.30945
15.796	1972	0.428	0.620449	0.97214	0.950851	0.977105	0.299984	0.271763	0.279257
16.143	1971	0.347	0.620449	0.971591	0.949827	0.97668	0.191583	0.220431	0.226655
16.444	1970	0.301	0.621802	0.970676	0.948388	0.975987	0.204992	0.191764	0.197342
16.569	1969	0.125	0.621802	0.970301	0.947762	0.975665	0.0833111	0.0796617	0.0820048
16.967	1968	0.398	0.621802	0.969305	0.946349	0.974768	0.243779	0.253872	0.261489
17.296	1967	0.329	0.633304	0.968544	0.945191	0.97422	0.21578	0.213869	0.220437
17.794	1966	0.498	0.633304	0.967186	0.943952	0.973554	0.320847	0.323953	0.334112
18.2	1965	0.406	0.633304	0.966253	0.942492	0.972881	0.268721	0.26429	0.272813
18.76	1964	0.56	0.640747	0.964531	0.939981	0.971656	0.378663	0.369281	0.381719
19.139	1963	0.379	0.640747	0.963124	0.938137	0.970724	0.246158	0.250164	0.258851
19.444	1962	0.305	0.649543	0.962224	0.93654	0.969796	0.216019	0.204276	0.211526
20.039	1961	0.595	0.649543	0.961017	0.934107	0.968429	0.392026	0.399067	0.41372
20.435	1960	0.396	0.653603	0.960115	0.9322	0.967481	0.251871	0.267535	0.277665
20.756	1959	0.321	0.653603	0.959196	0.93085	0.966553	0.224852	0.217077	0.225414
21.088	1958	0.332	0.653603	0.958359	0.929312	0.965777	0.252343	0.224684	0.233499
21.471	1957	0.383	0.659015	0.957502	0.92804	0.965056	0.227125	0.261545	0.271978
21.712	1956	0.241	0.659015	0.956802	0.927159	0.964482	0.185962	0.164676	0.171308
21.904	1955	0.192	0.659015	0.956401	0.926603	0.96411	0.13092	0.131242	0.136555
22.165	1954	0.261	0.667135	0.955892	0.925845	0.96365	0.188438	0.18069	0.188068
22.396	1953	0.231	0.667135	0.955484	0.924897	0.963278	0.209479	0.159974	0.166598
22.687	1952	0.291	0.667135	0.955012	0.924109	0.96291	0.153695	0.201603	0.210053
23.098	1951	0.411	0.667135	0.953968	0.922839	0.962147	0.286726	0.284978	0.297115
23.339	1950	0.241	0.669841	0.953587	0.921855	0.961791	0.168587	0.167845	0.175115
23.798	1949	0.459	0.669841	0.952792	0.920021	0.96075	0.323395	0.320016	0.334182
24.14	1948	0.342	0.669841	0.952033	0.918502	0.960089	0.239221	0.238608	0.249411
24.336	1947	0.196	0.671194	0.951496	0.917848	0.95949	0.141083	0.137108	0.143328
24.621	1946	0.285	0.671194	0.95067	0.916995	0.958844	0.197687	0.1995	0.208604
25.071	1945	0.45	0.671194	0.949484	0.915067	0.958139	0.318106	0.315234	0.330074
25.58	1944	0.509	0.689463	0.948344	0.912297	0.956835	0.370779	0.366769	0.384674
25.967	1943	0.387	0.689463	0.947569	0.910852	0.955566	0.28377	0.279228	0.292935
26.191	1942	0.224	0.685403	0.947202	0.910016	0.954982	0.159194	0.160767	0.168711
26.502	1941	0.311	0.685403	0.946554	0.90895	0.954492	0.224471	0.223324	0.234514
26.785	1940	0.283	0.685403	0.945725	0.907656	0.953866	0.210175	0.20335	0.213702
27.181	1939	0.396	0.685403	0.944707	0.906173	0.953003	0.282954	0.284803	0.29952
27.45	1938	0.269	0.696905	0.944056	0.905226	0.952319	0.199315	0.196854	0.207095
27.741	1937	0.291	0.696905	0.943442	0.904323	0.95175	0.214218	0.213081	0.224256
27.947	1936	0.206	0.696905	0.942924	0.903511	0.951378	0.155209	0.150899	0.158893
28.264	1935	0.317	0.703672	0.941969	0.902396	0.950824	0.231576	0.234601	0.247191
28.529	1934	0.265	0.703672	0.941223	0.901401	0.95022	0.201855	0.196242	0.206872
28.812	1933	0.283	0.703672	0.94055	0.900205	0.94966	0.209481	0.209695	0.221216
29.173	1932	0.361	0.703672	0.939684	0.898645	0.948904	0.26958	0.267706	0.282679
29.553	1931	0.38	0.710438	0.938777	0.89715	0.947879	0.287571	0.284812	0.300919
29.76	1930	0.207	0.710438	0.938219	0.896224	0.94735	0.159015	0.155234	0.164091
30.141	1929	0.381	0.710438	0.937111	0.894596	0.94657	0.288083	0.285955	0.302569
30.465	1928	0.324	0.713144	0.936568	0.893335	0.945844	0.251277	0.244287	0.258645
30.804	1927	0.339	0.713144	0.935844	0.892	0.945258	0.251471	0.255756	0.271026
31.04	1926	0.236	0.713144	0.935376	0.891167	0.944856	0.182979	0.178125	0.188857
31.409	1925	0.369	0.71788	0.934684	0.88983	0.944233	0.284177	0.280543	0.297694
31.635	1924	0.226	0.71788	0.934184	0.888994	0.943907	0.176746	0.171882	0.182498
31.856	1923	0.221	0.71788	0.933543	0.888269	0.943384	0.169179	0.168171	0.178605
32.202	1922	0.346	0.723293	0.932959	0.886952	0.942745	0.263592	0.265458	0.282155
32.392	1921	0.19	0.723293	0.932696	0.88617	0.942511	0.147342	0.145809	0.15508
32.675	1920	0.283	0.723293	0.931966	0.885031	0.942043	0.217303	0.217288	0.231286
33.022	1919	0.347	0.723293	0.930801	0.883714	0.941066	0.271971	0.266702	0.284012
33.273	1918	0.251	0.728029	0.930278	0.882886	0.940549	0.195647	0.194287	0.206978
33.642	1917	0.369	0.728029	0.92942	0.881392	0.939825	0.289826	0.285844	0.304797
33.805	1916	0.163	0.728029	0.929039	0.880552	0.939506	0.133219	0.12631	0.134766
34.069	1915	0.264	0.728029	0.928398	0.879269	0.93899	0.203888	0.204686	0.218586
34.383	1914	0.314	0.731412	0.927415	0.878093	0.938265	0.244483	0.244775	0.261549
34.788	1913	0.405	0.731412	0.926243	0.876658	0.937114	0.323758	0.316101	0.3379
35.135	1912	0.347	0.731412	0.925087	0.87523	0.936295	0.276728	0.271066	0.289977
35.318	1911	0.183	0.736825	0.924707	0.874431	0.935791	0.143428	0.14409	0.1542
35.602	1910	0.284	0.736825	0.924097	0.873186	0.935293	0.223257	0.223736	0.239649
35.816	1909	0.214	0.736825	0.923419	0.872368	0.934882	0.175546	0.168663	0.180749
36.206	1908	0.39	0.749004	0.921998	0.870719	0.933708	0.316831	0.312846	0.335475
36.477	1907	0.271	0.749004	0.921411	0.869503	0.932994	0.219481	0.217556	0.23344
36.822	1906	0.345	0.749004	0.92069	0.868089	0.932386	0.276599	0.277145	0.297672
36.999	1905	0.177	0.749004	0.920306	0.867316	0.932064	0.146495	0.142237	0.152856
37.398	1904	0.399	0.753064	0.919347	0.865494	0.93134	0.327653	0.322623	0.347165
37.678	1903	0.28	0.753064	0.918326	0.86428	0.93069	0.229613	0.22656	0.243967
37.97	1902	0.292	0.753064	0.917596	0.863155	0.929728	0.238001	0.236514	0.254756
38.303	1901	0.333	0.756447	0.916277	0.861977	0.928998	0.272436	0.27115	0.292233
38.561	1900	0.258	0.756447	0.915562	0.861247	0.928146	0.214813	0.210274	0.226608
38.95	1899	0.389	0.756447	0.914208	0.85993	0.927064	0.322699	0.317409	0.342189
39.188	1898	0.238	0.767273	0.913525	0.859017	0.926422	0.201577	0.197114	0.21258
39.496	1897	0.308	0.767273	0.912468	0.857751	0.925682	0.260675	0.255291	0.275507
39.715	1896	0.219	0.767273	0.911669	0.857103	0.924983	0.185158	0.181658	0.196045
39.89	1895	0.175	0.767273	0.911087	0.856582	0.924458	0.143167	0.145244	0.156753
39.901	1894	0.011	0.767273	0.910779	0.855951	0.9239	0.160115	0.00913244	0.00985676

## Sheet: RICE-12-13-B
Core:	RICE-12/13-B
Location:	79°21.726' S, 161°42.000' W
Drilled:	Jan 2013
Parameters used for annual layer counting: Continuous flow measurements of black carbon, Ca, pH, conductivity; stable isotopes; discrete samples of Na, Ca, Mg, I, and SO4, among others
Counting method: Manual
Depth [m]	Age [CE]	Layer thickness [m]	Density [g/cm3]	Thinning	Min thinning	Max thinning	Accumulation [m.w.eq]	Min accumulation [m.w.eq]	Max accumulation [m.w.eq]
0.528	2012	0.528	0.414669	0.999602	0.9996	0.9996	0.219872	0.219032	0.219032
1.288	2011	0.76	0.426057	0.998147	0.996362	0.998464	0.324433	0.3243	0.324982
1.462	2010	0.174	0.43435	0.997842	0.995775	0.998346	0.0739992	0.0757022	0.0758977
1.808	2009	0.346	0.438972	0.997254	0.994622	0.998183	0.154063	0.152161	0.152706
2.228	2008	0.42	0.445781	0.996723	0.993578	0.997799	0.187859	0.187641	0.188437
2.698	2007	0.47	0.45371	0.99599	0.992229	0.997279	0.214119	0.213825	0.214912
3.128	2006	0.43	0.461727	0.995382	0.991109	0.996732	0.19948	0.199193	0.200323
3.572	2005	0.444	0.469507	0.994673	0.98984	0.996164	0.207689	0.209264	0.210601
3.908	2004	0.336	0.47645	0.99415	0.988915	0.995729	0.162946	0.160774	0.161882
4.325	2003	0.417	0.483144	0.993581	0.987871	0.995192	0.204259	0.202444	0.203943
4.904	2002	0.579	0.491976	0.992573	0.986099	0.994524	0.28253	0.286422	0.288869
5.306	2001	0.402	0.500661	0.991779	0.984728	0.993875	0.206973	0.202506	0.204387
5.803	2000	0.497	0.508578	0.991028	0.983427	0.993062	0.251464	0.254529	0.257023
6.126	1999	0.323	0.515799	0.99065	0.982668	0.992561	0.171823	0.167852	0.169542
6.475	1998	0.349	0.521666	0.990274	0.981434	0.991976	0.184405	0.183532	0.185502
6.778	1997	0.303	0.527351	0.989853	0.980601	0.991615	0.159846	0.161138	0.162947
7.026	1996	0.248	0.532156	0.989449	0.979882	0.991297	0.134472	0.133133	0.134683
7.329	1995	0.303	0.536828	0.988945	0.979028	0.990907	0.162862	0.164151	0.166142
7.725	1994	0.396	0.542661	0.988383	0.978039	0.990451	0.219637	0.216965	0.219717
8.094	1993	0.369	0.549045	0.987923	0.977235	0.990092	0.200076	0.204625	0.207317
8.612	1992	0.518	0.550627	0.987092	0.975702	0.989407	0.290069	0.28828	0.292331
9.11	1991	0.498	0.55073	0.98622	0.974064	0.988624	0.279212	0.27742	0.281567
9.347	1990	0.237	0.550758	0.985818	0.973142	0.988208	0.134084	0.132087	0.134132
9.54	1989	0.193	0.550758	0.985391	0.972339	0.987793	0.106196	0.10761	0.10932
9.997	1988	0.457	0.550758	0.983964	0.970395	0.986808	0.257479	0.25506	0.259373
10.414	1987	0.417	0.573086	0.98335	0.969375	0.986316	0.238944	0.242293	0.246527
10.71	1986	0.296	0.573086	0.982887	0.968729	0.986051	0.174919	0.172034	0.175111
11.035	1985	0.325	0.573086	0.982263	0.967486	0.985493	0.192534	0.188994	0.19251
11.374	1984	0.339	0.581882	0.981573	0.966223	0.984851	0.195626	0.200292	0.204153
11.782	1983	0.408	0.581882	0.980763	0.964956	0.984194	0.24325	0.241222	0.246032
12.105	1982	0.323	0.581882	0.980148	0.96393	0.983709	0.195911	0.19106	0.19498
12.497	1981	0.392	0.593385	0.979358	0.962604	0.983084	0.237509	0.236609	0.241643
13.113	1980	0.616	0.593385	0.978112	0.960602	0.982065	0.373704	0.3722	0.380517
13.427	1979	0.314	0.600827	0.97738	0.959289	0.981464	0.193026	0.192223	0.196666
13.708	1978	0.281	0.600827	0.976634	0.957992	0.980855	0.172872	0.172128	0.176236
13.952	1977	0.244	0.600827	0.975841	0.956872	0.980224	0.150231	0.14956	0.153209
14.209	1976	0.257	0.601504	0.975253	0.955985	0.979721	0.158509	0.157786	0.161704
14.664	1975	0.455	0.601504	0.974402	0.95455	0.978992	0.280874	0.279557	0.286715
14.901	1974	0.237	0.601504	0.973856	0.953692	0.978529	0.146384	0.145684	0.149478
15.296	1973	0.395	0.620449	0.9732	0.952498	0.977972	0.251826	0.250597	0.257299
15.792	1972	0.496	0.620449	0.972224	0.951047	0.977209	0.316535	0.31492	0.323583
16.022	1971	0.23	0.620449	0.971676	0.950048	0.976772	0.146863	0.146097	0.150206
16.319	1970	0.297	0.621802	0.971035	0.948989	0.976277	0.190184	0.189163	0.194602
16.504	1969	0.185	0.621802	0.970465	0.948078	0.975828	0.118534	0.117883	0.121333
16.898	1968	0.394	0.621802	0.969571	0.946787	0.975046	0.252679	0.25126	0.258759
17.295	1967	0.397	0.633304	0.968615	0.945317	0.97428	0.259568	0.258059	0.265966
17.76	1966	0.465	0.633304	0.967244	0.944005	0.973583	0.304459	0.302477	0.311955
18.167	1965	0.407	0.633304	0.966325	0.942594	0.972928	0.266737	0.264927	0.273453
18.64	1964	0.473	0.640747	0.964804	0.940399	0.97186	0.31413	0.311849	0.322282
19.051	1963	0.411	0.640747	0.963435	0.938567	0.970941	0.273342	0.271229	0.280584
19.318	1962	0.267	0.649543	0.962505	0.937075	0.970107	0.180184	0.178772	0.185074

## Sheet: RID-75
Core:	RID-75
Location:	79°22' S, 161°40' W
Drilled:	1974/1975
Parameters used for annual layer counting: d18O
Counting method: Manual
Depth [m]	Age [CE]	Layer thickness [m]	Density [g/cm3]	Thinning	Min thinning	Max thinning	Accumulation [m.w.eq]	Min accumulation [m.w.eq]	Max accumulation [m.w.eq]
0.454	1974	0.454	0.414014	0.999657	0.999657	0.999657	0.188027	0.188027	0.188027
1.035	1973	0.581	0.423166	0.998516	0.997193	0.998756	0.246225	0.246166	0.246551
1.811	1972	0.776	0.435204	0.997734	0.995562	0.998316	0.338485	0.338288	0.339224
2.203	1971	0.392	0.445585	0.996739	0.993613	0.997812	0.175241	0.175053	0.175792
2.574	1970	0.371	0.452382	0.996113	0.992461	0.997368	0.168489	0.168277	0.169109
2.78	1969	0.206	0.457522	0.995701	0.991701	0.997021	0.0946565	0.0945311	0.0950383
3.244	1968	0.464	0.46349	0.995222	0.990826	0.996605	0.216092	0.215792	0.217051
3.678	1967	0.434	0.471483	0.994524	0.989577	0.99604	0.20575	0.205437	0.206779
4.29	1966	0.612	0.480793	0.993781	0.988245	0.995384	0.296087	0.29561	0.297746
4.798	1965	0.508	0.490725	0.992716	0.986353	0.99462	0.251118	0.250637	0.252738
5.466	1964	0.668	0.501137	0.991734	0.98465	0.993826	0.337549	0.336839	0.339978
5.869	1963	0.403	0.510568	0.990923	0.983219	0.992925	0.207644	0.207225	0.209271
6.296	1962	0.427	0.517864	0.990518	0.982241	0.992359	0.223245	0.22283	0.225126
6.989	1961	0.693	0.52763	0.98983	0.980569	0.9916	0.369405	0.368745	0.372894
7.349	1960	0.36	0.536686	0.988961	0.979062	0.990923	0.195364	0.194977	0.197339
7.759	1959	0.41	0.543112	0.988349	0.977989	0.990428	0.225301	0.224828	0.227688
8.133	1958	0.374	0.549654	0.987855	0.97711	0.990036	0.208098	0.20764	0.210386
8.624	1957	0.491	0.550632	0.987048	0.97561	0.989363	0.273908	0.273267	0.277119
8.915	1956	0.291	0.550712	0.986377	0.974354	0.988763	0.16247	0.162078	0.164475
9.117	1955	0.202	0.550758	0.98605	0.973675	0.988448	0.112827	0.112553	0.114261
9.407	1954	0.29	0.550758	0.985752	0.973023	0.988146	0.162028	0.161636	0.164148
9.681	1953	0.274	0.550758	0.984952	0.971747	0.987493	0.153213	0.152819	0.155295
10.109	1952	0.428	0.550758	0.983783	0.970102	0.986667	0.23961	0.23891	0.24299
10.645	1951	0.536	0.573086	0.983128	0.969062	0.986187	0.312446	0.311477	0.316981
