# Supplementary material for: A 2700-year annual timescale and accumulation history for an ice core from Roosevelt Island, West Antarctica
Source: Copernicus journal article supplement (doi:10.5194/cp-15-751-2019), 2019-04-10
Supplement: Supplementary file [file cp-15-751-2019-supplement-title-page.pdf › cp-15-751-2019-supplement-title-page.pdf]

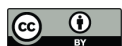

## *Supplement of*

# **A 2700-year annual timescale and accumulation history for an ice core from Roosevelt Island, West Antarctica**

**Mai Winstrup et al.**

*Correspondence to:* Mai Winstrup (mai@nbi.ku.dk)

- cp-15-751-2019-supplement-title-page.pdf
- RICE\_2700-year\_timescale\_and\_accumulation.xlsx
- RICE\_WD\_matchpoints.xlsx
- Timescales\_and\_accumulation\_rates\_from\_three\_Roosevelt\_Island\_cores.xlsx
- Winstrup\_2019\_supplementary.pdf

The copyright of individual parts of the supplement might differ from the CC BY 4.0 License.
